# Supplementary material for: [NiFe]-hydrogenase is essential for cyanobacterium Synechocystis sp. PCC 6803 aerobic growth in the dark
Source: PubMed Central journal article supplement (PMC4517062; doi:10.1038/srep12424), 2015-07-28
Supplement: srep12424-s1.pdf [file srep12424-s1.pdf]

[NiFe]-hydrogenase is essential for cyanobacterium *Synechocystis* sp. PCC 6803 aerobic growth in the dark

Edith De Rosa, Vanessa Checchetto, Cinzia Franchin, Elisabetta Bergantino, Paola Berto, Ildikò Szabò, Giorgio M. Giacometti, Giorgio Arrigoni, and Paola Costantini

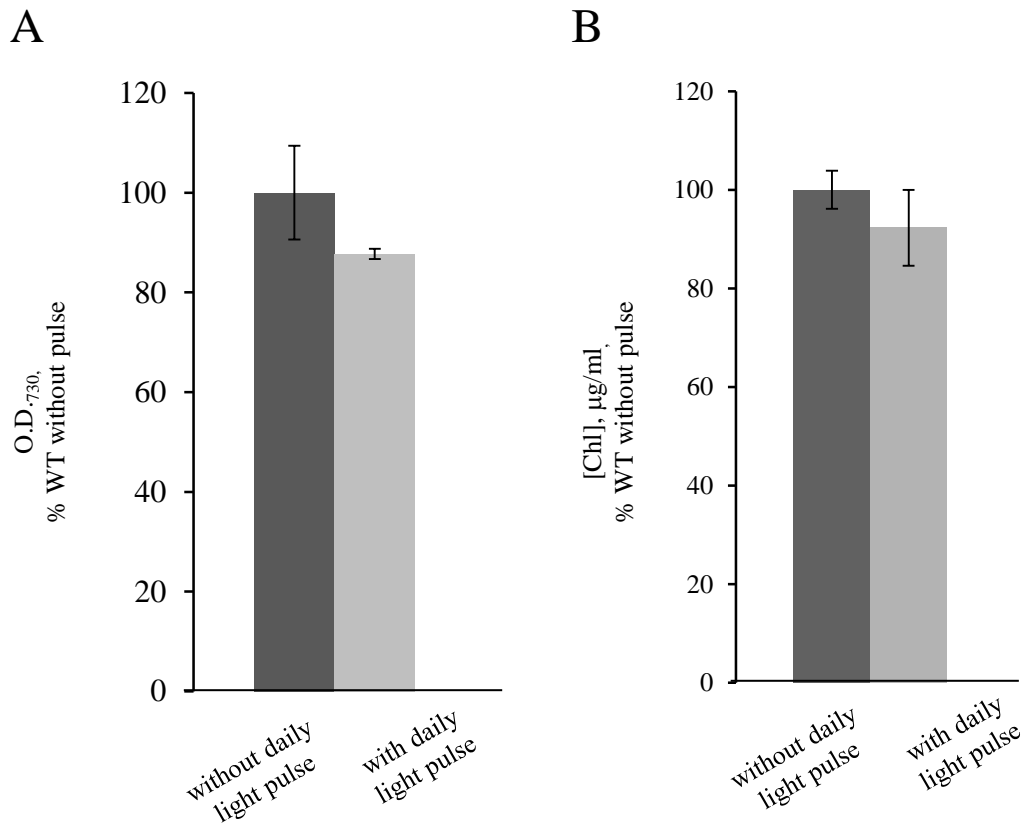

**Supplementary figure 1. Heterotrophic growth of wild type *Synechocystis* in the dark, with or without a daily light pulse.** Optical densities at 730 nm (O.D.<sub>730</sub>) (panel A) and chlorophyll concentration (panel B) of wild type cultures were measured after five days of growth in the dark, either without (dark grey) or with (light grey) a daily 5 minutes pulse of white light (50 mE m<sup>-2</sup> s<sup>-1</sup>). The values were normalized to those of the wild type grown without pulse of light (panel A, 1.7 ± 0.16; panel B, 5.2 µg/ml ± 0.2). Reported data result from the mean of three independent experiments ± Standard Deviation.

[NiFe]-hydrogenase is essential for cyanobacterium *Synechocystis* sp. PCC 6803 aerobic growth in the dark

Edith De Rosa, Vanessa Checchetto, Cinzia Franchin, Elisabetta Bergantino, Paola Berto, Ildikò Szabò, Giorgio M. Giacometti, Giorgio Arrigoni, and Paola Costantini

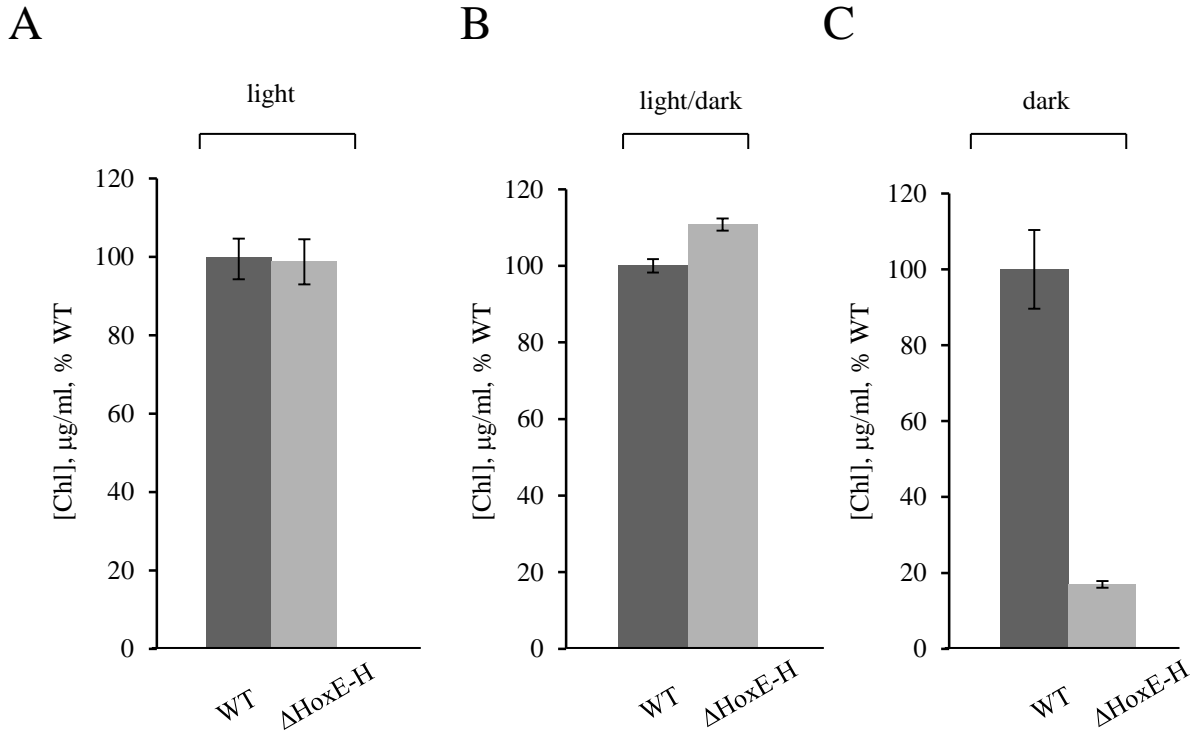

**Supplementary figure 2. Wild type *Synechocystis* is more resistant to prolonged darkness than  $\Delta\text{HoxE-H}$  mutant strain.** Panel A, continuous white light ( $50 \text{ mE m}^{-2} \text{ s}^{-1}$ ); panel B, 12 h cycles of light/dark; panel C, continuous darkness. Chlorophyll concentration ( $\mu\text{g/ml}$ ) of wild type (WT, dark grey) and  $\Delta\text{HoxE-H}$  (light grey) cultures was measured after five days of growth, and for each growth condition the values were normalized to the value of the corresponding WT (panel A,  $15.6 \pm 0.73$ ; panel B,  $13 \pm 0.23$ ; panel C,  $5.3 \pm 0.54$ ). Reported data result from the mean of three independent experiments  $\pm$  Standard Deviation.

[NiFe]-hydrogenase is essential for cyanobacterium *Synechocystis* sp. PCC 6803 aerobic growth in the dark

Edith De Rosa, Vanessa Checchetto, Cinzia Franchin, Elisabetta Bergantino, Paola Berto, Ildikò Szabò, Giorgio M. Giacometti, Giorgio Arrigoni, and Paola Costantini

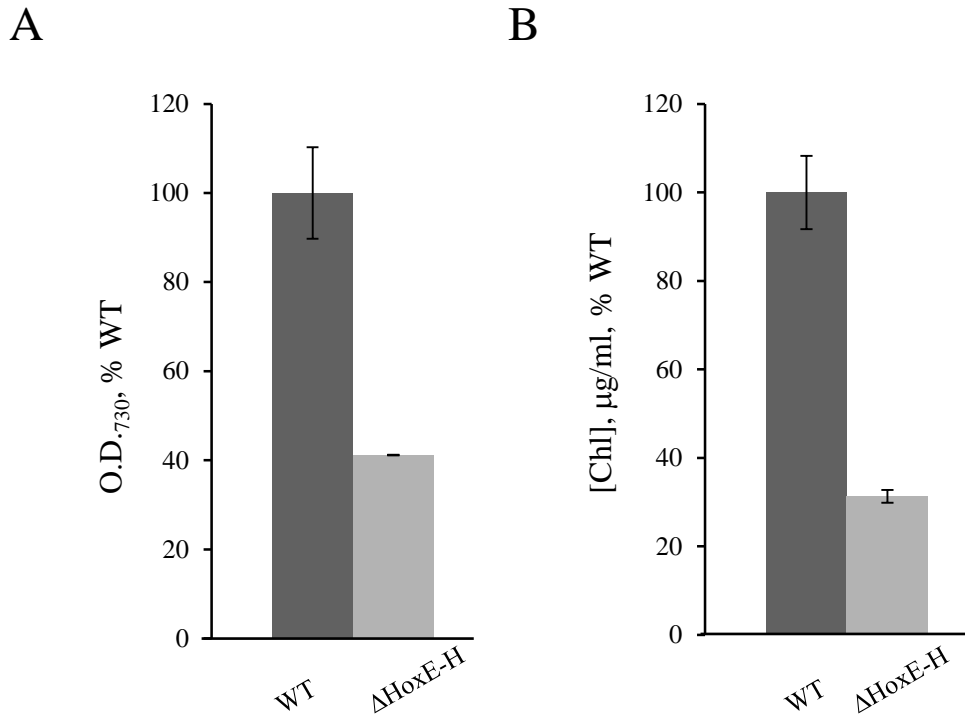

**Supplementary figure 3. Wild type *Synechocystis* is more resistant to prolonged darkness in anaerobiosis than  $\Delta$ HoxE-H strain.** Optical densities at 730 nm (O.D.<sub>730</sub>) (panel A) and chlorophyll concentration (panel B) of wild type (dark grey) and  $\Delta$ HoxE-H (light grey) cultures were measured after five days of anaerobic growth in the dark. The values were normalized to the O.D.<sub>730</sub> or chlorophyll concentration values of the wild type (panel A,  $1.9 \pm 0.19$ ; panel B,  $4.95 \mu\text{g/ml} \pm 0.41$ ). Reported data result from the mean of three independent experiments  $\pm$  Standard Deviation.

[NiFe]-hydrogenase is essential for cyanobacterium *Synechocystis* sp. PCC 6803 aerobic growth in the dark

Edith De Rosa, Vanessa Checchetto, Cinzia Franchin, Elisabetta Bergantino, Paola Berto, Ildikò Szabò, Giorgio M. Giacometti, Giorgio Arrigoni, and Paola Costantini

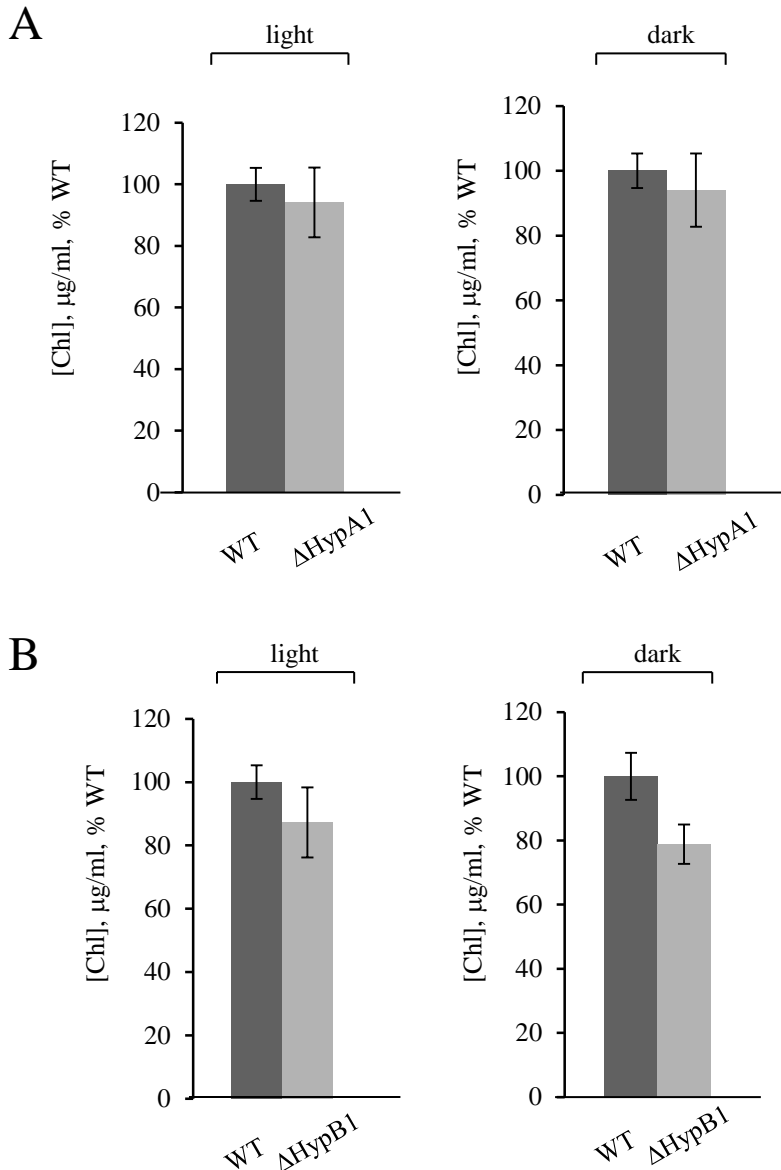

**Supplementary figure 4.  $\Delta$ HypA1 and  $\Delta$ HypB1 *Synechocystis* strains have the same growth phenotype of the wild type strain when cultured in the dark.** Panel A,  $\Delta$ HypA1; panel B,  $\Delta$ HypB1. Strains were grown either under continuous white light ( $50 \text{ mE m}^{-2} \text{ s}^{-1}$ ) or darkness. Chlorophyll concentration of WT (dark grey) and mutants (light grey) cultures were measured after five days, and for each growth condition the values were normalized to the chlorophyll concentration of the WT ( $20.97 \text{ } \mu\text{g/ml} \pm 1.12$  and  $4.1 \pm 0.3$  for light and darkness, respectively). Reported data result from the mean of three independent experiments  $\pm$  Standard Deviation.

**Supplementary table S1.** H<sub>2</sub> evolution activities of wild type,  $\Delta$ HypA1 and  $\Delta$ HypB1 *Synechocystis* strains

| Strain         | nmol H <sub>2</sub> · mg Chl <sup>-1</sup> · min <sup>-1</sup> ± SD <sup>(a)</sup> |
|----------------|------------------------------------------------------------------------------------|
| wild type      | 30 ± 3.1                                                                           |
| $\Delta$ HypA1 | N.A. <sup>(b)</sup>                                                                |
| $\Delta$ HypB1 | N.A. <sup>(b)</sup>                                                                |

<sup>(a)</sup> Reported values represent the mean of three independent experiments ± Standard Deviation

<sup>(b)</sup> N.A.: not applicable

**Supplementary Table S2**  
**16S rDNA Evolution in essential for cyanobacterial Symbioses up PC-803 azobenz growth in the dark**

**Fabrizio Rossi, Vanessa Chiochetti, Cinzia Fracchia, Elisabetta Bergamini, Paola Biondi, Ildiko Szabo, Giorgio M. Caspani, and Paola Cristofari**

| Accession | Strain                                                                         | Species | # Reads | # Proteins | Protein Group | Annotations | ACQ    | 16S117 | 16S117 Count | 16S117 variability (%) | g-value | RP      | IndScore | Exp Value | Charge | MW (kDa) | pI (pKa) | ST (DPI) | # Peptide Coverage |        |
|-----------|--------------------------------------------------------------------------------|---------|---------|------------|---------------|-------------|--------|--------|--------------|------------------------|---------|---------|----------|-----------|--------|----------|----------|----------|--------------------|--------|
|           |                                                                                |         |         |            |               |             |        |        |              |                        |         |         |          |           |        |          |          |          |                    | 16S117 |
| Q914      | Cyanobacteria strain CG-Symbioses up (Strain PC-803) / Azobenz (PC-1) / 16S117 | ATP5A1  | 15      | 1          | ATP5A1        | ATP5A1      | 0.0000 | 0.001  | 1            | 0.0000                 | 0.0000  | 0.0000  | 0.0000   | 1.0E-10   | 14     | 20.0000  | 4.1      | 20.0000  | 0.01               | 20.00  |
|           |                                                                                | ATP5B1  | 15      | 1          | ATP5B1        | ATP5B1      | 0.0000 | 0.001  | 1            | 0.0000                 | 0.0000  | 0.0000  | 0.0000   | 1.0E-10   | 14     | 20.0000  | 4.1      | 20.0000  | 0.01               | 20.00  |
|           |                                                                                | ATP5C1  | 15      | 1          | ATP5C1        | ATP5C1      | 0.0000 | 0.001  | 1            | 0.0000                 | 0.0000  | 0.0000  | 0.0000   | 1.0E-10   | 14     | 20.0000  | 4.1      | 20.0000  | 0.01               | 20.00  |
|           |                                                                                | ATP5D1  | 15      | 1          | ATP5D1        | ATP5D1      | 0.0000 | 0.001  | 1            | 0.0000                 | 0.0000  | 0.0000  | 0.0000   | 1.0E-10   | 14     | 20.0000  | 4.1      | 20.0000  | 0.01               | 20.00  |
|           |                                                                                | ATP5E1  | 15      | 1          | ATP5E1        | ATP5E1      | 0.0000 | 0.001  | 1            | 0.0000                 | 0.0000  | 0.0000  | 0.0000   | 1.0E-10   | 14     | 20.0000  | 4.1      | 20.0000  | 0.01               | 20.00  |
|           |                                                                                | ATP5F1  | 15      | 1          | ATP5F1        | ATP5F1      | 0.0000 | 0.001  | 1            | 0.0000                 | 0.0000  | 0.0000  | 0.0000   | 1.0E-10   | 14     | 20.0000  | 4.1      | 20.0000  | 0.01               | 20.00  |
|           |                                                                                | ATP5G1  | 15      | 1          | ATP5G1        | ATP5G1      | 0.0000 | 0.001  | 1            | 0.0000                 | 0.0000  | 0.0000  | 0.0000   | 1.0E-10   | 14     | 20.0000  | 4.1      | 20.0000  | 0.01               | 20.00  |
|           |                                                                                | ATP5H1  | 15      | 1          | ATP5H1        | ATP5H1      | 0.0000 | 0.001  | 1            | 0.0000                 | 0.0000  | 0.0000  | 0.0000   | 1.0E-10   | 14     | 20.0000  | 4.1      | 20.0000  | 0.01               | 20.00  |
|           |                                                                                | ATP5I1  | 15      | 1          | ATP5I1        | ATP5I1      | 0.0000 | 0.001  | 1            | 0.0000                 | 0.0000  | 0.0000  | 0.0000   | 1.0E-10   | 14     | 20.0000  | 4.1      | 20.0000  | 0.01               | 20.00  |
|           |                                                                                | ATP5J1  | 15      | 1          | ATP5J1        | ATP5J1      | 0.0000 | 0.001  | 1            | 0.0000                 | 0.0000  | 0.0000  | 0.0000   | 1.0E-10   | 14     | 20.0000  | 4.1      | 20.0000  | 0.01               | 20.00  |
|           |                                                                                | ATP5K1  | 15      | 1          | ATP5K1        | ATP5K1      | 0.0000 | 0.001  | 1            | 0.0000                 | 0.0000  | 0.0000  | 0.0000   | 1.0E-10   | 14     | 20.0000  | 4.1      | 20.0000  | 0.01               | 20.00  |
|           |                                                                                | ATP5L1  | 15      | 1          | ATP5L1        | ATP5L1      | 0.0000 | 0.001  | 1            | 0.0000                 | 0.0000  | 0.0000  | 0.0000   | 1.0E-10   | 14     | 20.0000  | 4.1      | 20.0000  | 0.01               | 20.00  |
|           |                                                                                | ATP5M1  | 15      | 1          | ATP5M1        | ATP5M1      | 0.0000 | 0.001  | 1            | 0.0000                 | 0.0000  | 0.0000  | 0.0000   | 1.0E-10   | 14     | 20.0000  | 4.1      | 20.0000  | 0.01               | 20.00  |
|           |                                                                                | ATP5N1  | 15      | 1          | ATP5N1        | ATP5N1      | 0.0000 | 0.001  | 1            | 0.0000                 | 0.0000  | 0.0000  | 0.0000   | 1.0E-10   | 14     | 20.0000  | 4.1      | 20.0000  | 0.01               | 20.00  |
|           |                                                                                | ATP5O1  | 15      | 1          | ATP5O1        | ATP5O1      | 0.0000 | 0.001  | 1            | 0.0000                 | 0.0000  | 0.0000  | 0.0000   | 1.0E-10   | 14     | 20.0000  | 4.1      | 20.0000  | 0.01               | 20.00  |
|           |                                                                                | ATP5P1  | 15      | 1          | ATP5P1        | ATP5P1      | 0.0000 | 0.001  | 1            | 0.0000                 | 0.0000  | 0.0000  | 0.0000   | 1.0E-10   | 14     | 20.0000  | 4.1      | 20.0000  | 0.01               | 20.00  |
|           |                                                                                | ATP5Q1  | 15      | 1          | ATP5Q1        | ATP5Q1      | 0.0000 | 0.001  | 1            | 0.0000                 | 0.0000  | 0.0000  | 0.0000   | 1.0E-10   | 14     | 20.0000  | 4.1      | 20.0000  | 0.01               | 20.00  |
|           |                                                                                | ATP5R1  | 15      | 1          | ATP5R1        | ATP5R1      | 0.0000 | 0.001  | 1            | 0.0000                 | 0.0000  | 0.0000  | 0.0000   | 1.0E-10   | 14     | 20.0000  | 4.1      | 20.0000  | 0.01               | 20.00  |
|           |                                                                                | ATP5S1  | 15      | 1          | ATP5S1        | ATP5S1      | 0.0000 | 0.001  | 1            | 0.0000                 | 0.0000  | 0.0000  | 0.0000   | 1.0E-10   | 14     | 20.0000  | 4.1      | 20.0000  | 0.01               | 20.00  |
|           |                                                                                | ATP5T1  | 15      | 1          | ATP5T1        | ATP5T1      | 0.0000 | 0.001  | 1            | 0.0000                 | 0.0000  | 0.0000  | 0.0000   | 1.0E-10   | 14     | 20.0000  | 4.1      | 20.0000  | 0.01               | 20.00  |
|           |                                                                                | ATP5U1  | 15      | 1          | ATP5U1        | ATP5U1      | 0.0000 | 0.001  | 1            | 0.0000                 | 0.0000  | 0.0000  | 0.0000   | 1.0E-10   | 14     | 20.0000  | 4.1      | 20.0000  | 0.01               | 20.00  |
|           |                                                                                | ATP5V1  | 15      | 1          | ATP5V1        | ATP5V1      | 0.0000 | 0.001  | 1            | 0.0000                 | 0.0000  | 0.0000  | 0.0000   | 1.0E-10   | 14     | 20.0000  | 4.1      | 20.0000  | 0.01               | 20.00  |
|           |                                                                                | ATP5W1  | 15      | 1          | ATP5W1        | ATP5W1      | 0.0000 | 0.001  | 1            | 0.0000                 | 0.0000  | 0.0000  | 0.0000   | 1.0E-10   | 14     | 20.0000  | 4.1      | 20.0000  | 0.01               | 20.00  |
|           |                                                                                | ATP5X1  | 15      | 1          | ATP5X1        | ATP5X1      | 0.0000 | 0.001  | 1            | 0.0000                 | 0.0000  | 0.0000  | 0.0000   | 1.0E-10   | 14     | 20.0000  | 4.1      | 20.0000  | 0.01               | 20.00  |
|           |                                                                                | ATP5Y1  | 15      | 1          | ATP5Y1        | ATP5Y1      | 0.0000 | 0.001  | 1            | 0.0000                 | 0.0000  | 0.0000  | 0.0000   | 1.0E-10   | 14     | 20.0000  | 4.1      | 20.0000  | 0.01               | 20.00  |
| ATP5Z1    | 15                                                                             | 1       | ATP5Z1  | ATP5Z1     | 0.0000        | 0.001       | 1      | 0.0000 | 0.0000       | 0.0000                 | 0.0000  | 1.0E-10 | 14       | 20.0000   | 4.1    | 20.0000  | 0.01     | 20.00    |                    |        |

























































































**Supplementary Table 4**  
 NAD<sup>+</sup> dependence is essential for cyanobacterium *Synechocystis* sp. PCC 6803 aerobic growth in the dark  
 Fishi Da Rosa, Vanessa Checchetto, Clara Franchin, Elisabetta Bergamini, Paola Berto, Ildiko Szabo, Giorgio M. Giacomini, Giorgio Arrigoni, and Paolo Costantini

| Strain | Gene                                                                               | Accession | Length (aa) | F. Protein | F. Protein Group | Protein Group Accession | Description  | ACO | 141615 Count | 141616 Count | 141617 Count | 141618 Count | 141619 Count | 141620 Count | 141621 Count | 141622 Count | 141623 Count | 141624 Count | 141625 Count | 141626 Count | 141627 Count | 141628 Count | 141629 Count | 141630 Count | 141631 Count | 141632 Count | 141633 Count | 141634 Count | 141635 Count | 141636 Count | 141637 Count | 141638 Count | 141639 Count | 141640 Count | 141641 Count | 141642 Count | 141643 Count | 141644 Count | 141645 Count | 141646 Count | 141647 Count | 141648 Count | 141649 Count | 141650 Count | 141651 Count | 141652 Count | 141653 Count | 141654 Count | 141655 Count | 141656 Count | 141657 Count | 141658 Count | 141659 Count | 141660 Count | 141661 Count | 141662 Count | 141663 Count | 141664 Count | 141665 Count | 141666 Count | 141667 Count | 141668 Count | 141669 Count | 141670 Count | 141671 Count | 141672 Count | 141673 Count | 141674 Count | 141675 Count | 141676 Count | 141677 Count | 141678 Count | 141679 Count | 141680 Count | 141681 Count | 141682 Count | 141683 Count | 141684 Count | 141685 Count | 141686 Count | 141687 Count | 141688 Count | 141689 Count | 141690 Count | 141691 Count | 141692 Count | 141693 Count | 141694 Count | 141695 Count | 141696 Count | 141697 Count | 141698 Count | 141699 Count | 141700 Count | 141701 Count | 141702 Count | 141703 Count | 141704 Count | 141705 Count | 141706 Count | 141707 Count | 141708 Count | 141709 Count | 141710 Count | 141711 Count | 141712 Count | 141713 Count | 141714 Count | 141715 Count | 141716 Count | 141717 Count | 141718 Count | 141719 Count | 141720 Count | 141721 Count | 141722 Count | 141723 Count | 141724 Count | 141725 Count | 141726 Count | 141727 Count | 141728 Count | 141729 Count | 141730 Count | 141731 Count | 141732 Count | 141733 Count | 141734 Count | 141735 Count | 141736 Count | 141737 Count | 141738 Count | 141739 Count | 141740 Count | 141741 Count | 141742 Count | 141743 Count | 141744 Count | 141745 Count | 141746 Count | 141747 Count | 141748 Count | 141749 Count | 141750 Count | 141751 Count | 141752 Count | 141753 Count | 141754 Count | 141755 Count | 141756 Count | 141757 Count | 141758 Count | 141759 Count | 141760 Count | 141761 Count | 141762 Count | 141763 Count | 141764 Count | 141765 Count | 141766 Count | 141767 Count | 141768 Count | 141769 Count | 141770 Count | 141771 Count | 141772 Count | 141773 Count | 141774 Count | 141775 Count | 141776 Count | 141777 Count | 141778 Count | 141779 Count | 141780 Count | 141781 Count | 141782 Count | 141783 Count | 141784 Count | 141785 Count | 141786 Count | 141787 Count | 141788 Count | 141789 Count | 141790 Count | 141791 Count | 141792 Count | 141793 Count | 141794 Count | 141795 Count | 141796 Count | 141797 Count | 141798 Count | 141799 Count | 141800 Count | 141801 Count | 141802 Count | 141803 Count | 141804 Count | 141805 Count | 141806 Count | 141807 Count | 141808 Count | 141809 Count | 141810 Count | 141811 Count | 141812 Count | 141813 Count | 141814 Count | 141815 Count | 141816 Count | 141817 Count | 141818 Count | 141819 Count | 141820 Count | 141821 Count | 141822 Count | 141823 Count | 141824 Count | 141825 Count | 141826 Count | 141827 Count | 141828 Count | 141829 Count | 141830 Count | 141831 Count | 141832 Count | 141833 Count | 141834 Count | 141835 Count | 141836 Count | 141837 Count | 141838 Count | 141839 Count | 141840 Count | 141841 Count | 141842 Count | 141843 Count | 141844 Count | 141845 Count | 141846 Count | 141847 Count | 141848 Count | 141849 Count | 141850 Count | 141851 Count | 141852 Count | 141853 Count | 141854 Count | 141855 Count | 141856 Count | 141857 Count | 141858 Count | 141859 Count | 141860 Count | 141861 Count | 141862 Count | 141863 Count | 141864 Count | 141865 Count | 141866 Count | 141867 Count | 141868 Count | 141869 Count | 141870 Count | 141871 Count | 141872 Count | 141873 Count | 141874 Count | 141875 Count | 141876 Count | 141877 Count | 141878 Count | 141879 Count | 141880 Count | 141881 Count | 141882 Count | 141883 Count | 141884 Count | 141885 Count | 141886 Count | 141887 Count | 141888 Count | 141889 Count | 141890 Count | 141891 Count | 141892 Count | 141893 Count | 141894 Count | 141895 Count | 141896 Count | 141897 Count | 141898 Count | 141899 Count | 141900 Count | 141901 Count | 141902 Count | 141903 Count | 141904 Count | 141905 Count | 141906 Count | 141907 Count | 141908 Count | 141909 Count | 141910 Count | 141911 Count | 141912 Count | 141913 Count | 141914 Count | 141915 Count | 141916 Count | 141917 Count | 141918 Count | 141919 Count | 141920 Count | 141921 Count | 141922 Count | 141923 Count | 141924 Count | 141925 Count | 141926 Count | 141927 Count | 141928 Count | 141929 Count | 141930 Count | 141931 Count | 141932 Count | 141933 Count | 141934 Count | 141935 Count | 141936 Count | 141937 Count | 141938 Count | 141939 Count | 141940 Count | 141941 Count | 141942 Count | 141943 Count | 141944 Count | 141945 Count | 141946 Count | 141947 Count | 141948 Count | 141949 Count | 141950 Count | 141951 Count | 141952 Count | 141953 Count | 141954 Count | 141955 Count | 141956 Count | 141957 Count | 141958 Count | 141959 Count | 141960 Count | 141961 Count | 141962 Count | 141963 Count | 141964 Count | 141965 Count | 141966 Count | 141967 Count | 141968 Count | 141969 Count | 141970 Count | 141971 Count | 141972 Count | 141973 Count | 141974 Count | 141975 Count | 141976 Count | 141977 Count | 141978 Count | 141979 Count | 141980 Count | 141981 Count | 141982 Count | 141983 Count | 141984 Count | 141985 Count | 141986 Count | 141987 Count | 141988 Count | 141989 Count | 141990 Count | 141991 Count | 141992 Count | 141993 Count | 141994 Count | 141995 Count | 141996 Count | 141997 Count | 141998 Count | 141999 Count | 142000 Count |
|--------|------------------------------------------------------------------------------------|-----------|-------------|------------|------------------|-------------------------|--------------|-----|--------------|--------------|--------------|--------------|--------------|--------------|--------------|--------------|--------------|--------------|--------------|--------------|--------------|--------------|--------------|--------------|--------------|--------------|--------------|--------------|--------------|--------------|--------------|--------------|--------------|--------------|--------------|--------------|--------------|--------------|--------------|--------------|--------------|--------------|--------------|--------------|--------------|--------------|--------------|--------------|--------------|--------------|--------------|--------------|--------------|--------------|--------------|--------------|--------------|--------------|--------------|--------------|--------------|--------------|--------------|--------------|--------------|--------------|--------------|--------------|--------------|--------------|--------------|--------------|--------------|--------------|--------------|--------------|--------------|--------------|--------------|--------------|--------------|--------------|--------------|--------------|--------------|--------------|--------------|--------------|--------------|--------------|--------------|--------------|--------------|--------------|--------------|--------------|--------------|--------------|--------------|--------------|--------------|--------------|--------------|--------------|--------------|--------------|--------------|--------------|--------------|--------------|--------------|--------------|--------------|--------------|--------------|--------------|--------------|--------------|--------------|--------------|--------------|--------------|--------------|--------------|--------------|--------------|--------------|--------------|--------------|--------------|--------------|--------------|--------------|--------------|--------------|--------------|--------------|--------------|--------------|--------------|--------------|--------------|--------------|--------------|--------------|--------------|--------------|--------------|--------------|--------------|--------------|--------------|--------------|--------------|--------------|--------------|--------------|--------------|--------------|--------------|--------------|--------------|--------------|--------------|--------------|--------------|--------------|--------------|--------------|--------------|--------------|--------------|--------------|--------------|--------------|--------------|--------------|--------------|--------------|--------------|--------------|--------------|--------------|--------------|--------------|--------------|--------------|--------------|--------------|--------------|--------------|--------------|--------------|--------------|--------------|--------------|--------------|--------------|--------------|--------------|--------------|--------------|--------------|--------------|--------------|--------------|--------------|--------------|--------------|--------------|--------------|--------------|--------------|--------------|--------------|--------------|--------------|--------------|--------------|--------------|--------------|--------------|--------------|--------------|--------------|--------------|--------------|--------------|--------------|--------------|--------------|--------------|--------------|--------------|--------------|--------------|--------------|--------------|--------------|--------------|--------------|--------------|--------------|--------------|--------------|--------------|--------------|--------------|--------------|--------------|--------------|--------------|--------------|--------------|--------------|--------------|--------------|--------------|--------------|--------------|--------------|--------------|--------------|--------------|--------------|--------------|--------------|--------------|--------------|--------------|--------------|--------------|--------------|--------------|--------------|--------------|--------------|--------------|--------------|--------------|--------------|--------------|--------------|--------------|--------------|--------------|--------------|--------------|--------------|--------------|--------------|--------------|--------------|--------------|--------------|--------------|--------------|--------------|--------------|--------------|--------------|--------------|--------------|--------------|--------------|--------------|--------------|--------------|--------------|--------------|--------------|--------------|--------------|--------------|--------------|--------------|--------------|--------------|--------------|--------------|--------------|--------------|--------------|--------------|--------------|--------------|--------------|--------------|--------------|--------------|--------------|--------------|--------------|--------------|--------------|--------------|--------------|--------------|--------------|--------------|--------------|--------------|--------------|--------------|--------------|--------------|--------------|--------------|--------------|--------------|--------------|--------------|--------------|--------------|--------------|--------------|--------------|--------------|--------------|--------------|--------------|--------------|--------------|--------------|--------------|--------------|--------------|--------------|--------------|--------------|--------------|--------------|--------------|--------------|--------------|--------------|--------------|--------------|--------------|--------------|--------------|--------------|--------------|--------------|--------------|--------------|--------------|--------------|--------------|--------------|--------------|--------------|--------------|--------------|
|        |                                                                                    |           |             |            |                  |                         |              |     |              |              |              |              |              |              |              |              |              |              |              |              |              |              |              |              |              |              |              |              |              |              |              |              |              |              |              |              |              |              |              |              |              |              |              |              |              |              |              |              |              |              |              |              |              |              |              |              |              |              |              |              |              |              |              |              |              |              |              |              |              |              |              |              |              |              |              |              |              |              |              |              |              |              |              |              |              |              |              |              |              |              |              |              |              |              |              |              |              |              |              |              |              |              |              |              |              |              |              |              |              |              |              |              |              |              |              |              |              |              |              |              |              |              |              |              |              |              |              |              |              |              |              |              |              |              |              |              |              |              |              |              |              |              |              |              |              |              |              |              |              |              |              |              |              |              |              |              |              |              |              |              |              |              |              |              |              |              |              |              |              |              |              |              |              |              |              |              |              |              |              |              |              |              |              |              |              |              |              |              |              |              |              |              |              |              |              |              |              |              |              |              |              |              |              |              |              |              |              |              |              |              |              |              |              |              |              |              |              |              |              |              |              |              |              |              |              |              |              |              |              |              |              |              |              |              |              |              |              |              |              |              |              |              |              |              |              |              |              |              |              |              |              |              |              |              |              |              |              |              |              |              |              |              |              |              |              |              |              |              |              |              |              |              |              |              |              |              |              |              |              |              |              |              |              |              |              |              |              |              |              |              |              |              |              |              |              |              |              |              |              |              |              |              |              |              |              |              |              |              |              |              |              |              |              |              |              |              |              |              |              |              |              |              |              |              |              |              |              |              |              |              |              |              |              |              |              |              |              |              |              |              |              |              |              |              |              |              |              |              |              |              |              |              |              |              |              |              |              |              |              |              |              |              |              |              |              |              |              |              |              |              |              |              |              |              |              |              |              |              |              |              |              |              |              |              |              |              |              |              |              |              |              |              |              |              |
| Q0914  | Cyanobacteria alpha class CG-Synechocystis sp. (strain PCC 6803) / Accession Q0914 | 56512     | 56512       | 1          | 1                | Protein Group Accession | NonRedundant | ACO | 141615       | 141616       | 141617       | 141618       | 141619       | 141620       | 141621       | 141622       | 141623       | 141624       | 141625       | 141626       | 141627       | 141628       | 141629       | 141630       | 141631       | 141632       | 141633       | 141634       | 141635       | 141636       | 141637       | 141638       | 141639       | 141640       | 141641       | 141642       | 141643       | 141644       | 141645       | 141646       | 141647       | 141648       | 141649       | 141650       | 141651       | 141652       | 141653       | 141654       | 141655       | 141656       | 141657       | 141658       | 141659       | 141660       | 141661       | 141662       | 141663       | 141664       | 141665       | 141666       | 141667       | 141668       | 141669       | 141670       | 141671       | 141672       | 141673       | 141674       | 141675       | 141676       | 141677       | 141678       | 141679       | 141680       | 141681       | 141682       | 141683       | 141684       | 141685       | 141686       | 141687       | 141688       | 141689       | 141690       | 141691       | 141692       | 141693       | 141694       | 141695       | 141696       | 141697       | 141698       | 141699       | 141700       | 141701       | 141702       | 141703       | 141704       | 141705       | 141706       | 141707       | 141708       | 141709       | 141710       | 141          |              |              |              |              |              |              |              |              |              |              |              |              |              |              |              |              |              |              |              |              |              |              |              |              |              |              |              |              |              |              |              |              |              |              |              |              |              |              |              |              |              |              |              |              |              |              |              |              |              |              |              |              |              |              |              |              |              |              |              |              |              |              |              |              |              |              |              |              |              |              |              |              |              |              |              |              |              |              |              |              |              |              |              |              |              |              |              |              |              |              |              |              |              |              |              |              |              |              |              |              |              |              |              |              |              |              |              |              |              |              |              |              |              |              |              |              |              |              |              |              |              |              |              |              |              |              |              |              |              |              |              |              |              |              |              |              |              |              |              |              |              |              |              |              |              |              |              |              |              |              |              |              |              |              |              |              |              |              |              |              |              |              |              |              |              |              |              |              |              |              |              |              |              |              |              |              |              |              |              |              |              |              |              |              |              |              |              |              |              |              |              |              |              |              |              |              |              |              |              |              |              |              |              |              |              |              |              |              |              |              |              |              |              |              |              |              |              |              |              |              |              |              |              |              |              |              |              |              |              |              |              |              |              |              |              |              |              |              |              |              |              |              |              |              |              |              |              |              |              |              |              |              |              |              |              |              |              |              |              |              |              |              |              |              |              |              |              |              |              |              |              |              |              |              |              |              |              |              |              |              |              |              |              |              |              |              |              |              |              |









| ID | Name | Seq | Start | End | Strand | Gene | Transcript | Accession | Length | GC | GC3 | GC4 | GC5 | GC6 | GC7 | GC8 | GC9 | GC10 | GC11 | GC12 | GC13 | GC14 | GC15 | GC16 | GC17 | GC18 | GC19 | GC20 | GC21 | GC22 | GC23 | GC24 | GC25 | GC26 | GC27 | GC28 | GC29 | GC30 | GC31 | GC32 | GC33 | GC34 | GC35 | GC36 | GC37 | GC38 | GC39 | GC40 | GC41 | GC42 | GC43 | GC44 | GC45 | GC46 | GC47 | GC48 | GC49 | GC50 | GC51 | GC52 | GC53 | GC54 | GC55 | GC56 | GC57 | GC58 | GC59 | GC60 | GC61 | GC62 | GC63 | GC64 | GC65 | GC66 | GC67 | GC68 | GC69 | GC70 | GC71 | GC72 | GC73 | GC74 | GC75 | GC76 | GC77 | GC78 | GC79 | GC80 | GC81 | GC82 | GC83 | GC84 | GC85 | GC86 | GC87 | GC88 | GC89 | GC90 | GC91 | GC92 | GC93 | GC94 | GC95 | GC96 | GC97 | GC98 | GC99 | GC100 | GC101 | GC102 | GC103 | GC104 | GC105 | GC106 | GC107 | GC108 | GC109 | GC110 | GC111 | GC112 | GC113 | GC114 | GC115 | GC116 | GC117 | GC118 | GC119 | GC120 | GC121 | GC122 | GC123 | GC124 | GC125 | GC126 | GC127 | GC128 | GC129 | GC130 | GC131 | GC132 | GC133 | GC134 | GC135 | GC136 | GC137 | GC138 | GC139 | GC140 | GC141 | GC142 | GC143 | GC144 | GC145 | GC146 | GC147 | GC148 | GC149 | GC150 | GC151 | GC152 | GC153 | GC154 | GC155 | GC156 | GC157 | GC158 | GC159 | GC160 | GC161 | GC162 | GC163 | GC164 | GC165 | GC166 | GC167 | GC168 | GC169 | GC170 | GC171 | GC172 | GC173 | GC174 | GC175 | GC176 | GC177 | GC178 | GC179 | GC180 | GC181 | GC182 | GC183 | GC184 | GC185 | GC186 | GC187 | GC188 | GC189 | GC190 | GC191 | GC192 | GC193 | GC194 | GC195 | GC196 | GC197 | GC198 | GC199 | GC200 | GC201 | GC202 | GC203 | GC204 | GC205 | GC206 | GC207 | GC208 | GC209 | GC210 | GC211 | GC212 | GC213 | GC214 | GC215 | GC216 | GC217 | GC218 | GC219 | GC220 | GC221 | GC222 | GC223 | GC224 | GC225 | GC226 | GC227 | GC228 | GC229 | GC230 | GC231 | GC232 | GC233 | GC234 | GC235 | GC236 | GC237 | GC238 | GC239 | GC240 | GC241 | GC242 | GC243 | GC244 | GC245 | GC246 | GC247 | GC248 | GC249 | GC250 | GC251 | GC252 | GC253 | GC254 | GC255 | GC256 | GC257 | GC258 | GC259 | GC260 | GC261 | GC262 | GC263 | GC264 | GC265 | GC266 | GC267 | GC268 | GC269 | GC270 | GC271 | GC272 | GC273 | GC274 | GC275 | GC276 | GC277 | GC278 | GC279 | GC280 | GC281 | GC282 | GC283 | GC284 | GC285 | GC286 | GC287 | GC288 | GC289 | GC290 | GC291 | GC292 | GC293 | GC294 | GC295 | GC296 | GC297 | GC298 | GC299 | GC300 | GC301 | GC302 | GC303 | GC304 | GC305 | GC306 | GC307 | GC308 | GC309 | GC310 | GC311 | GC312 | GC313 | GC314 | GC315 | GC316 | GC317 | GC318 | GC319 | GC320 | GC321 | GC322 | GC323 | GC324 | GC325 | GC326 | GC327 | GC328 | GC329 | GC330 | GC331 | GC332 | GC333 | GC334 | GC335 | GC336 | GC337 | GC338 | GC339 | GC340 | GC341 | GC342 | GC343 | GC344 | GC345 | GC346 | GC347 | GC348 | GC349 | GC350 | GC351 | GC352 | GC353 | GC354 | GC355 | GC356 | GC357 | GC358 | GC359 | GC360 | GC361 | GC362 | GC363 | GC364 | GC365 | GC366 | GC367 | GC368 | GC369 | GC370 | GC371 | GC372 | GC373 | GC374 | GC375 | GC376 | GC377 | GC378 | GC379 | GC380 | GC381 | GC382 | GC383 | GC384 | GC385 | GC386 | GC387 | GC388 | GC389 | GC390 | GC391 | GC392 | GC393 | GC394 | GC395 | GC396 | GC397 | GC398 | GC399 | GC400 | GC401 | GC402 | GC403 | GC404 | GC405 | GC406 | GC407 | GC408 | GC409 | GC410 | GC411 | GC412 | GC413 | GC414 | GC415 | GC416 | GC417 | GC418 | GC419 | GC420 | GC421 | GC422 | GC423 | GC424 | GC425 | GC426 | GC427 | GC428 | GC429 | GC430 | GC431 | GC432 | GC433 | GC434 | GC435 | GC436 | GC437 | GC438 | GC439 | GC440 | GC441 | GC442 | GC443 | GC444 | GC445 | GC446 | GC447 | GC448 | GC449 | GC450 | GC451 | GC452 | GC453 | GC454 | GC455 | GC456 | GC457 | GC458 | GC459 | GC460 | GC461 | GC462 | GC463 | GC464 | GC465 | GC466 | GC467 | GC468 | GC469 | GC470 | GC471 | GC472 | GC473 | GC474 | GC475 | GC476 | GC477 | GC478 | GC479 | GC480 | GC481 | GC482 | GC483 | GC484 | GC485 | GC486 | GC487 | GC488 | GC489 | GC490 | GC491 | GC492 | GC493 | GC494 | GC495 | GC496 | GC497 | GC498 | GC499 | GC500 | GC501 | GC502 | GC503 | GC504 | GC505 | GC506 | GC507 | GC508 | GC509 | GC510 | GC511 | GC512 | GC513 | GC514 | GC515 | GC516 | GC517 | GC518 | GC519 | GC520 | GC521 | GC522 | GC523 | GC524 | GC525 | GC526 | GC527 | GC528 | GC529 | GC530 | GC531 | GC532 | GC533 | GC534 | GC535 | GC536 | GC537 | GC538 | GC539 | GC540 | GC541 | GC542 | GC543 | GC544 | GC545 | GC546 | GC547 | GC548 | GC549 | GC550 | GC551 | GC552 | GC553 | GC554 | GC555 | GC556 | GC557 | GC558 | GC559 | GC560 | GC561 | GC562 | GC563 | GC564 | GC565 | GC566 | GC567 | GC568 | GC569 | GC570 | GC571 | GC572 | GC573 | GC574 | GC575 | GC576 | GC577 | GC578 | GC579 | GC580 | GC581 | GC582 | GC583 | GC584 | GC585 | GC586 | GC587 | GC588 | GC589 | GC590 | GC591 | GC592 | GC593 | GC594 | GC595 | GC596 | GC597 | GC598 | GC599 | GC600 | GC601 | GC602 | GC603 | GC604 | GC605 | GC606 | GC607 | GC608 | GC609 | GC610 | GC611 | GC612 | GC613 | GC614 | GC615 | GC616 | GC617 | GC618 | GC619 | GC620 | GC621 | GC622 | GC623 | GC624 | GC625 | GC626 | GC627 | GC628 | GC629 | GC630 | GC631 | GC632 | GC633 | GC634 | GC635 | GC636 | GC637 | GC638 | GC639 | GC640 | GC641 | GC642 | GC643 | GC644 | GC645 | GC646 | GC647 | GC648 | GC649 | GC650 | GC651 | GC652 | GC653 | GC654 | GC655 | GC656 | GC657 | GC658 | GC659 | GC660 | GC661 | GC662 | GC663 | GC664 | GC665 | GC666 | GC667 | GC668 | GC669 | GC670 | GC671 | GC672 | GC673 | GC674 | GC675 | GC676 | GC677 | GC678 | GC679 | GC680 | GC681 | GC682 | GC683 | GC684 | GC685 | GC686 | GC687 | GC688 | GC689 | GC690 | GC691 | GC692 | GC693 | GC694 | GC695 | GC696 | GC697 | GC698 | GC699 | GC700 | GC701 | GC702 | GC703 | GC704 | GC705 | GC706 | GC707 | GC708 | GC709 | GC710 | GC711 | GC712 | GC713 | GC714 | GC715 | GC716 | GC717 | GC718 | GC719 | GC720 | GC721 | GC722 | GC723 | GC724 | GC725 | GC726 | GC727 | GC728 | GC729 | GC730 | GC731 | GC732 | GC733 | GC734 | GC735 | GC736 | GC737 | GC738 | GC739 | GC740 | GC741 | GC742 | GC743 | GC744 | GC745 | GC746 | GC747 | GC748 | GC749 | GC750 | GC751 | GC752 | GC753 | GC754 | GC755 | GC756 | GC757 | GC758 | GC759 | GC760 | GC761 | GC762 | GC763 | GC764 | GC765 | GC766 | GC767 | GC768 | GC769 | GC770 | GC771 | GC772 | GC773 | GC774 | GC775 | GC776 | GC777 | GC778 | GC779 | GC780 | GC781 | GC782 | GC783 | GC784 | GC785 | GC786 | GC787 | GC788 | GC789 | GC790 | GC791 | GC792 | GC793 | GC794 | GC795 | GC796 | GC797 | GC798 | GC799 | GC800 | GC801 | GC802 | GC803 | GC804 | GC805 | GC806 | GC807 | GC808 | GC809 | GC810 | GC811 | GC812 | GC813 | GC814 | GC815 | GC816 | GC817 | GC818 | GC819 | GC820 | GC821 | GC822 | GC823 | GC824 | GC825 | GC826 | GC827 | GC828 | GC829 | GC830 | GC831 | GC832 | GC833 | GC834 | GC835 | GC836 | GC837 | GC838 | GC839 | GC840 | GC841 | GC842 | GC843 | GC844 | GC845 | GC846 | GC847 | GC848 | GC849 | GC850 | GC851 | GC852 | GC853 | GC854 | GC855 | GC856 | GC857 | GC858 | GC859 | GC860 | GC861 | GC862 | GC863 | GC864 | GC865 | GC866 | GC867 | GC868 | GC869 | GC870 | GC871 | GC872 | GC873 | GC874 | GC875 | GC876 | GC877 | GC878 | GC879 | GC880 | GC881 | GC882 | GC883 | GC884 | GC885 | GC886 | GC887 | GC888 | GC889 | GC890 | GC891 | GC892 | GC893 | GC894 | GC895 | GC896 | GC897 | GC898 | GC899 | GC900 | GC901 | GC902 | GC903 | GC904 | GC905 | GC906 | GC907 | GC908 | GC909 | GC910 | GC911 | GC912 | GC913 | GC914 | GC915 | GC916 | GC917 | GC918 | GC919 | GC920 | GC921 | GC922 | GC923 | GC924 | GC925 | GC926 | GC927 | GC928 | GC929 | GC930 | GC931 | GC932 | GC933 | GC934 | GC935 | GC936 | GC937 | GC938 | GC939 | GC940 | GC941 | GC942 | GC943 | GC944 | GC945 | GC946 | GC947 | GC948 | GC949 | GC950 | GC951</ |
|----|------|-----|-------|-----|--------|------|------------|-----------|--------|----|-----|-----|-----|-----|-----|-----|-----|------|------|------|------|------|------|------|------|------|------|------|------|------|------|------|------|------|------|------|------|------|------|------|------|------|------|------|------|------|------|------|------|------|------|------|------|------|------|------|------|------|------|------|------|------|------|------|------|------|------|------|------|------|------|------|------|------|------|------|------|------|------|------|------|------|------|------|------|------|------|------|------|------|------|------|------|------|------|------|------|------|------|------|------|------|------|------|------|------|------|-------|-------|-------|-------|-------|-------|-------|-------|-------|-------|-------|-------|-------|-------|-------|-------|-------|-------|-------|-------|-------|-------|-------|-------|-------|-------|-------|-------|-------|-------|-------|-------|-------|-------|-------|-------|-------|-------|-------|-------|-------|-------|-------|-------|-------|-------|-------|-------|-------|-------|-------|-------|-------|-------|-------|-------|-------|-------|-------|-------|-------|-------|-------|-------|-------|-------|-------|-------|-------|-------|-------|-------|-------|-------|-------|-------|-------|-------|-------|-------|-------|-------|-------|-------|-------|-------|-------|-------|-------|-------|-------|-------|-------|-------|-------|-------|-------|-------|-------|-------|-------|-------|-------|-------|-------|-------|-------|-------|-------|-------|-------|-------|-------|-------|-------|-------|-------|-------|-------|-------|-------|-------|-------|-------|-------|-------|-------|-------|-------|-------|-------|-------|-------|-------|-------|-------|-------|-------|-------|-------|-------|-------|-------|-------|-------|-------|-------|-------|-------|-------|-------|-------|-------|-------|-------|-------|-------|-------|-------|-------|-------|-------|-------|-------|-------|-------|-------|-------|-------|-------|-------|-------|-------|-------|-------|-------|-------|-------|-------|-------|-------|-------|-------|-------|-------|-------|-------|-------|-------|-------|-------|-------|-------|-------|-------|-------|-------|-------|-------|-------|-------|-------|-------|-------|-------|-------|-------|-------|-------|-------|-------|-------|-------|-------|-------|-------|-------|-------|-------|-------|-------|-------|-------|-------|-------|-------|-------|-------|-------|-------|-------|-------|-------|-------|-------|-------|-------|-------|-------|-------|-------|-------|-------|-------|-------|-------|-------|-------|-------|-------|-------|-------|-------|-------|-------|-------|-------|-------|-------|-------|-------|-------|-------|-------|-------|-------|-------|-------|-------|-------|-------|-------|-------|-------|-------|-------|-------|-------|-------|-------|-------|-------|-------|-------|-------|-------|-------|-------|-------|-------|-------|-------|-------|-------|-------|-------|-------|-------|-------|-------|-------|-------|-------|-------|-------|-------|-------|-------|-------|-------|-------|-------|-------|-------|-------|-------|-------|-------|-------|-------|-------|-------|-------|-------|-------|-------|-------|-------|-------|-------|-------|-------|-------|-------|-------|-------|-------|-------|-------|-------|-------|-------|-------|-------|-------|-------|-------|-------|-------|-------|-------|-------|-------|-------|-------|-------|-------|-------|-------|-------|-------|-------|-------|-------|-------|-------|-------|-------|-------|-------|-------|-------|-------|-------|-------|-------|-------|-------|-------|-------|-------|-------|-------|-------|-------|-------|-------|-------|-------|-------|-------|-------|-------|-------|-------|-------|-------|-------|-------|-------|-------|-------|-------|-------|-------|-------|-------|-------|-------|-------|-------|-------|-------|-------|-------|-------|-------|-------|-------|-------|-------|-------|-------|-------|-------|-------|-------|-------|-------|-------|-------|-------|-------|-------|-------|-------|-------|-------|-------|-------|-------|-------|-------|-------|-------|-------|-------|-------|-------|-------|-------|-------|-------|-------|-------|-------|-------|-------|-------|-------|-------|-------|-------|-------|-------|-------|-------|-------|-------|-------|-------|-------|-------|-------|-------|-------|-------|-------|-------|-------|-------|-------|-------|-------|-------|-------|-------|-------|-------|-------|-------|-------|-------|-------|-------|-------|-------|-------|-------|-------|-------|-------|-------|-------|-------|-------|-------|-------|-------|-------|-------|-------|-------|-------|-------|-------|-------|-------|-------|-------|-------|-------|-------|-------|-------|-------|-------|-------|-------|-------|-------|-------|-------|-------|-------|-------|-------|-------|-------|-------|-------|-------|-------|-------|-------|-------|-------|-------|-------|-------|-------|-------|-------|-------|-------|-------|-------|-------|-------|-------|-------|-------|-------|-------|-------|-------|-------|-------|-------|-------|-------|-------|-------|-------|-------|-------|-------|-------|-------|-------|-------|-------|-------|-------|-------|-------|-------|-------|-------|-------|-------|-------|-------|-------|-------|-------|-------|-------|-------|-------|-------|-------|-------|-------|-------|-------|-------|-------|-------|-------|-------|-------|-------|-------|-------|-------|-------|-------|-------|-------|-------|-------|-------|-------|-------|-------|-------|-------|-------|-------|-------|-------|-------|-------|-------|-------|-------|-------|-------|-------|-------|-------|-------|-------|-------|-------|-------|-------|-------|-------|-------|-------|-------|-------|-------|-------|-------|-------|-------|-------|-------|-------|-------|-------|-------|-------|-------|-------|-------|-------|-------|-------|-------|-------|-------|-------|-------|-------|-------|-------|-------|-------|-------|-------|-------|-------|-------|-------|-------|-------|-------|-------|-------|-------|-------|-------|-------|-------|-------|-------|-------|-------|-------|-------|-------|-------|-------|-------|-------|-------|-------|-------|-------|-------|-------|-------|-------|-------|-------|-------|-------|-------|-------|-------|-------|-------|-------|-------|-------|-------|-------|-------|-------|-------|-------|-------|-------|-------|-------|-------|-------|-------|-------|-------|-------|-------|-------|-------|-------|-------|-------|-------|-------|-------|-------|-------|-------|-------|-------|-------|-------|-------|-------|-------|-------|-------|-------|-------|-------|-------|-------|-------|-------|-------|-------|-------|-------|-------|-------|-------|-------|-------|-------|-------|-------|-------|-------|-------|-------|-------|-------|-------|-------|-------|-------|-------|-------|-------|-------|-------|-------|-------|-------|-------|-------|-------|-------|-------|-------|-------|-------|-------|-------|-------|-------|-------|-------|-------|-------|-------|-------|-------|-------|-------|-------|-------|-------|-------|-------|-------|-------|-------|-------|-------|-------|-------|-------|-------|-------|-------|-------|-------|-------|-------|-------|-------|-------|-------|-------|-------|-------|---------|
|----|------|-----|-------|-----|--------|------|------------|-----------|--------|----|-----|-----|-----|-----|-----|-----|-----|------|------|------|------|------|------|------|------|------|------|------|------|------|------|------|------|------|------|------|------|------|------|------|------|------|------|------|------|------|------|------|------|------|------|------|------|------|------|------|------|------|------|------|------|------|------|------|------|------|------|------|------|------|------|------|------|------|------|------|------|------|------|------|------|------|------|------|------|------|------|------|------|------|------|------|------|------|------|------|------|------|------|------|------|------|------|------|------|------|------|-------|-------|-------|-------|-------|-------|-------|-------|-------|-------|-------|-------|-------|-------|-------|-------|-------|-------|-------|-------|-------|-------|-------|-------|-------|-------|-------|-------|-------|-------|-------|-------|-------|-------|-------|-------|-------|-------|-------|-------|-------|-------|-------|-------|-------|-------|-------|-------|-------|-------|-------|-------|-------|-------|-------|-------|-------|-------|-------|-------|-------|-------|-------|-------|-------|-------|-------|-------|-------|-------|-------|-------|-------|-------|-------|-------|-------|-------|-------|-------|-------|-------|-------|-------|-------|-------|-------|-------|-------|-------|-------|-------|-------|-------|-------|-------|-------|-------|-------|-------|-------|-------|-------|-------|-------|-------|-------|-------|-------|-------|-------|-------|-------|-------|-------|-------|-------|-------|-------|-------|-------|-------|-------|-------|-------|-------|-------|-------|-------|-------|-------|-------|-------|-------|-------|-------|-------|-------|-------|-------|-------|-------|-------|-------|-------|-------|-------|-------|-------|-------|-------|-------|-------|-------|-------|-------|-------|-------|-------|-------|-------|-------|-------|-------|-------|-------|-------|-------|-------|-------|-------|-------|-------|-------|-------|-------|-------|-------|-------|-------|-------|-------|-------|-------|-------|-------|-------|-------|-------|-------|-------|-------|-------|-------|-------|-------|-------|-------|-------|-------|-------|-------|-------|-------|-------|-------|-------|-------|-------|-------|-------|-------|-------|-------|-------|-------|-------|-------|-------|-------|-------|-------|-------|-------|-------|-------|-------|-------|-------|-------|-------|-------|-------|-------|-------|-------|-------|-------|-------|-------|-------|-------|-------|-------|-------|-------|-------|-------|-------|-------|-------|-------|-------|-------|-------|-------|-------|-------|-------|-------|-------|-------|-------|-------|-------|-------|-------|-------|-------|-------|-------|-------|-------|-------|-------|-------|-------|-------|-------|-------|-------|-------|-------|-------|-------|-------|-------|-------|-------|-------|-------|-------|-------|-------|-------|-------|-------|-------|-------|-------|-------|-------|-------|-------|-------|-------|-------|-------|-------|-------|-------|-------|-------|-------|-------|-------|-------|-------|-------|-------|-------|-------|-------|-------|-------|-------|-------|-------|-------|-------|-------|-------|-------|-------|-------|-------|-------|-------|-------|-------|-------|-------|-------|-------|-------|-------|-------|-------|-------|-------|-------|-------|-------|-------|-------|-------|-------|-------|-------|-------|-------|-------|-------|-------|-------|-------|-------|-------|-------|-------|-------|-------|-------|-------|-------|-------|-------|-------|-------|-------|-------|-------|-------|-------|-------|-------|-------|-------|-------|-------|-------|-------|-------|-------|-------|-------|-------|-------|-------|-------|-------|-------|-------|-------|-------|-------|-------|-------|-------|-------|-------|-------|-------|-------|-------|-------|-------|-------|-------|-------|-------|-------|-------|-------|-------|-------|-------|-------|-------|-------|-------|-------|-------|-------|-------|-------|-------|-------|-------|-------|-------|-------|-------|-------|-------|-------|-------|-------|-------|-------|-------|-------|-------|-------|-------|-------|-------|-------|-------|-------|-------|-------|-------|-------|-------|-------|-------|-------|-------|-------|-------|-------|-------|-------|-------|-------|-------|-------|-------|-------|-------|-------|-------|-------|-------|-------|-------|-------|-------|-------|-------|-------|-------|-------|-------|-------|-------|-------|-------|-------|-------|-------|-------|-------|-------|-------|-------|-------|-------|-------|-------|-------|-------|-------|-------|-------|-------|-------|-------|-------|-------|-------|-------|-------|-------|-------|-------|-------|-------|-------|-------|-------|-------|-------|-------|-------|-------|-------|-------|-------|-------|-------|-------|-------|-------|-------|-------|-------|-------|-------|-------|-------|-------|-------|-------|-------|-------|-------|-------|-------|-------|-------|-------|-------|-------|-------|-------|-------|-------|-------|-------|-------|-------|-------|-------|-------|-------|-------|-------|-------|-------|-------|-------|-------|-------|-------|-------|-------|-------|-------|-------|-------|-------|-------|-------|-------|-------|-------|-------|-------|-------|-------|-------|-------|-------|-------|-------|-------|-------|-------|-------|-------|-------|-------|-------|-------|-------|-------|-------|-------|-------|-------|-------|-------|-------|-------|-------|-------|-------|-------|-------|-------|-------|-------|-------|-------|-------|-------|-------|-------|-------|-------|-------|-------|-------|-------|-------|-------|-------|-------|-------|-------|-------|-------|-------|-------|-------|-------|-------|-------|-------|-------|-------|-------|-------|-------|-------|-------|-------|-------|-------|-------|-------|-------|-------|-------|-------|-------|-------|-------|-------|-------|-------|-------|-------|-------|-------|-------|-------|-------|-------|-------|-------|-------|-------|-------|-------|-------|-------|-------|-------|-------|-------|-------|-------|-------|-------|-------|-------|-------|-------|-------|-------|-------|-------|-------|-------|-------|-------|-------|-------|-------|-------|-------|-------|-------|-------|-------|-------|-------|-------|-------|-------|-------|-------|-------|-------|-------|-------|-------|-------|-------|-------|-------|-------|-------|-------|-------|-------|-------|-------|-------|-------|-------|-------|-------|-------|-------|-------|-------|-------|-------|-------|-------|-------|-------|-------|-------|-------|-------|-------|-------|-------|-------|-------|-------|-------|-------|-------|-------|-------|-------|-------|-------|-------|-------|-------|-------|-------|-------|-------|-------|-------|-------|-------|-------|-------|-------|-------|-------|-------|-------|-------|-------|-------|-------|-------|-------|-------|-------|-------|-------|-------|-------|-------|-------|-------|-------|-------|-------|-------|-------|-------|-------|-------|-------|-------|-------|-------|-------|-------|-------|-------|-------|-------|-------|-------|-------|-------|-------|-------|-------|-------|-------|-------|-------|-------|-------|-------|-------|-------|---------|























| ID | Name | Seq | Start | End | Strand | Gene | Product | Accession | Length | GC | GC3 | GC4 | GC5 | GC6 | GC7 | GC8 | GC9 | GC10 | GC11 | GC12 | GC13 | GC14 | GC15 | GC16 | GC17 | GC18 | GC19 | GC20 | GC21 | GC22 | GC23 | GC24 | GC25 | GC26 | GC27 | GC28 | GC29 | GC30 | GC31 | GC32 | GC33 | GC34 | GC35 | GC36 | GC37 | GC38 | GC39 | GC40 | GC41 | GC42 | GC43 | GC44 | GC45 | GC46 | GC47 | GC48 | GC49 | GC50 | GC51 | GC52 | GC53 | GC54 | GC55 | GC56 | GC57 | GC58 | GC59 | GC60 | GC61 | GC62 | GC63 | GC64 | GC65 | GC66 | GC67 | GC68 | GC69 | GC70 | GC71 | GC72 | GC73 | GC74 | GC75 | GC76 | GC77 | GC78 | GC79 | GC80 | GC81 | GC82 | GC83 | GC84 | GC85 | GC86 | GC87 | GC88 | GC89 | GC90 | GC91 | GC92 | GC93 | GC94 | GC95 | GC96 | GC97 | GC98 | GC99 | GC100 | GC101 | GC102 | GC103 | GC104 | GC105 | GC106 | GC107 | GC108 | GC109 | GC110 | GC111 | GC112 | GC113 | GC114 | GC115 | GC116 | GC117 | GC118 | GC119 | GC120 | GC121 | GC122 | GC123 | GC124 | GC125 | GC126 | GC127 | GC128 | GC129 | GC130 | GC131 | GC132 | GC133 | GC134 | GC135 | GC136 | GC137 | GC138 | GC139 | GC140 | GC141 | GC142 | GC143 | GC144 | GC145 | GC146 | GC147 | GC148 | GC149 | GC150 | GC151 | GC152 | GC153 | GC154 | GC155 | GC156 | GC157 | GC158 | GC159 | GC160 | GC161 | GC162 | GC163 | GC164 | GC165 | GC166 | GC167 | GC168 | GC169 | GC170 | GC171 | GC172 | GC173 | GC174 | GC175 | GC176 | GC177 | GC178 | GC179 | GC180 | GC181 | GC182 | GC183 | GC184 | GC185 | GC186 | GC187 | GC188 | GC189 | GC190 | GC191 | GC192 | GC193 | GC194 | GC195 | GC196 | GC197 | GC198 | GC199 | GC200 | GC201 | GC202 | GC203 | GC204 | GC205 | GC206 | GC207 | GC208 | GC209 | GC210 | GC211 | GC212 | GC213 | GC214 | GC215 | GC216 | GC217 | GC218 | GC219 | GC220 | GC221 | GC222 | GC223 | GC224 | GC225 | GC226 | GC227 | GC228 | GC229 | GC230 | GC231 | GC232 | GC233 | GC234 | GC235 | GC236 | GC237 | GC238 | GC239 | GC240 | GC241 | GC242 | GC243 | GC244 | GC245 | GC246 | GC247 | GC248 | GC249 | GC250 | GC251 | GC252 | GC253 | GC254 | GC255 | GC256 | GC257 | GC258 | GC259 | GC260 | GC261 | GC262 | GC263 | GC264 | GC265 | GC266 | GC267 | GC268 | GC269 | GC270 | GC271 | GC272 | GC273 | GC274 | GC275 | GC276 | GC277 | GC278 | GC279 | GC280 | GC281 | GC282 | GC283 | GC284 | GC285 | GC286 | GC287 | GC288 | GC289 | GC290 | GC291 | GC292 | GC293 | GC294 | GC295 | GC296 | GC297 | GC298 | GC299 | GC300 | GC301 | GC302 | GC303 | GC304 | GC305 | GC306 | GC307 | GC308 | GC309 | GC310 | GC311 | GC312 | GC313 | GC314 | GC315 | GC316 | GC317 | GC318 | GC319 | GC320 | GC321 | GC322 | GC323 | GC324 | GC325 | GC326 | GC327 | GC328 | GC329 | GC330 | GC331 | GC332 | GC333 | GC334 | GC335 | GC336 | GC337 | GC338 | GC339 | GC340 | GC341 | GC342 | GC343 | GC344 | GC345 | GC346 | GC347 | GC348 | GC349 | GC350 | GC351 | GC352 | GC353 | GC354 | GC355 | GC356 | GC357 | GC358 | GC359 | GC360 | GC361 | GC362 | GC363 | GC364 | GC365 | GC366 | GC367 | GC368 | GC369 | GC370 | GC371 | GC372 | GC373 | GC374 | GC375 | GC376 | GC377 | GC378 | GC379 | GC380 | GC381 | GC382 | GC383 | GC384 | GC385 | GC386 | GC387 | GC388 | GC389 | GC390 | GC391 | GC392 | GC393 | GC394 | GC395 | GC396 | GC397 | GC398 | GC399 | GC400 | GC401 | GC402 | GC403 | GC404 | GC405 | GC406 | GC407 | GC408 | GC409 | GC410 | GC411 | GC412 | GC413 | GC414 | GC415 | GC416 | GC417 | GC418 | GC419 | GC420 | GC421 | GC422 | GC423 | GC424 | GC425 | GC426 | GC427 | GC428 | GC429 | GC430 | GC431 | GC432 | GC433 | GC434 | GC435 | GC436 | GC437 | GC438 | GC439 | GC440 | GC441 | GC442 | GC443 | GC444 | GC445 | GC446 | GC447 | GC448 | GC449 | GC450 | GC451 | GC452 | GC453 | GC454 | GC455 | GC456 | GC457 | GC458 | GC459 | GC460 | GC461 | GC462 | GC463 | GC464 | GC465 | GC466 | GC467 | GC468 | GC469 | GC470 | GC471 | GC472 | GC473 | GC474 | GC475 | GC476 | GC477 | GC478 | GC479 | GC480 | GC481 | GC482 | GC483 | GC484 | GC485 | GC486 | GC487 | GC488 | GC489 | GC490 | GC491 | GC492 | GC493 | GC494 | GC495 | GC496 | GC497 | GC498 | GC499 | GC500 | GC501 | GC502 | GC503 | GC504 | GC505 | GC506 | GC507 | GC508 | GC509 | GC510 | GC511 | GC512 | GC513 | GC514 | GC515 | GC516 | GC517 | GC518 | GC519 | GC520 | GC521 | GC522 | GC523 | GC524 | GC525 | GC526 | GC527 | GC528 | GC529 | GC530 | GC531 | GC532 | GC533 | GC534 | GC535 | GC536 | GC537 | GC538 | GC539 | GC540 | GC541 | GC542 | GC543 | GC544 | GC545 | GC546 | GC547 | GC548 | GC549 | GC550 | GC551 | GC552 | GC553 | GC554 | GC555 | GC556 | GC557 | GC558 | GC559 | GC560 | GC561 | GC562 | GC563 | GC564 | GC565 | GC566 | GC567 | GC568 | GC569 | GC570 | GC571 | GC572 | GC573 | GC574 | GC575 | GC576 | GC577 | GC578 | GC579 | GC580 | GC581 | GC582 | GC583 | GC584 | GC585 | GC586 | GC587 | GC588 | GC589 | GC590 | GC591 | GC592 | GC593 | GC594 | GC595 | GC596 | GC597 | GC598 | GC599 | GC600 | GC601 | GC602 | GC603 | GC604 | GC605 | GC606 | GC607 | GC608 | GC609 | GC610 | GC611 | GC612 | GC613 | GC614 | GC615 | GC616 | GC617 | GC618 | GC619 | GC620 | GC621 | GC622 | GC623 | GC624 | GC625 | GC626 | GC627 | GC628 | GC629 | GC630 | GC631 | GC632 | GC633 | GC634 | GC635 | GC636 | GC637 | GC638 | GC639 | GC640 | GC641 | GC642 | GC643 | GC644 | GC645 | GC646 | GC647 | GC648 | GC649 | GC650 | GC651 | GC652 | GC653 | GC654 | GC655 | GC656 | GC657 | GC658 | GC659 | GC660 | GC661 | GC662 | GC663 | GC664 | GC665 | GC666 | GC667 | GC668 | GC669 | GC670 | GC671 | GC672 | GC673 | GC674 | GC675 | GC676 | GC677 | GC678 | GC679 | GC680 | GC681 | GC682 | GC683 | GC684 | GC685 | GC686 | GC687 | GC688 | GC689 | GC690 | GC691 | GC692 | GC693 | GC694 | GC695 | GC696 | GC697 | GC698 | GC699 | GC700 | GC701 | GC702 | GC703 | GC704 | GC705 | GC706 | GC707 | GC708 | GC709 | GC710 | GC711 | GC712 | GC713 | GC714 | GC715 | GC716 | GC717 | GC718 | GC719 | GC720 | GC721 | GC722 | GC723 | GC724 | GC725 | GC726 | GC727 | GC728 | GC729 | GC730 | GC731 | GC732 | GC733 | GC734 | GC735 | GC736 | GC737 | GC738 | GC739 | GC740 | GC741 | GC742 | GC743 | GC744 | GC745 | GC746 | GC747 | GC748 | GC749 | GC750 | GC751 | GC752 | GC753 | GC754 | GC755 | GC756 | GC757 | GC758 | GC759 | GC760 | GC761 | GC762 | GC763 | GC764 | GC765 | GC766 | GC767 | GC768 | GC769 | GC770 | GC771 | GC772 | GC773 | GC774 | GC775 | GC776 | GC777 | GC778 | GC779 | GC780 | GC781 | GC782 | GC783 | GC784 | GC785 | GC786 | GC787 | GC788 | GC789 | GC790 | GC791 | GC792 | GC793 | GC794 | GC795 | GC796 | GC797 | GC798 | GC799 | GC800 | GC801 | GC802 | GC803 | GC804 | GC805 | GC806 | GC807 | GC808 | GC809 | GC810 | GC811 | GC812 | GC813 | GC814 | GC815 | GC816 | GC817 | GC818 | GC819 | GC820 | GC821 | GC822 | GC823 | GC824 | GC825 | GC826 | GC827 | GC828 | GC829 | GC830 | GC831 | GC832 | GC833 | GC834 | GC835 | GC836 | GC837 | GC838 | GC839 | GC840 | GC841 | GC842 | GC843 | GC844 | GC845 | GC846 | GC847 | GC848 | GC849 | GC850 | GC851 | GC852 | GC853 | GC854 | GC855 | GC856 | GC857 | GC858 | GC859 | GC860 | GC861 | GC862 | GC863 | GC864 | GC865 | GC866 | GC867 | GC868 | GC869 | GC870 | GC871 | GC872 | GC873 | GC874 | GC875 | GC876 | GC877 | GC878 | GC879 | GC880 | GC881 | GC882 | GC883 | GC884 | GC885 | GC886 | GC887 | GC888 | GC889 | GC890 | GC891 | GC892 | GC893 | GC894 | GC895 | GC896 | GC897 | GC898 | GC899 | GC900 | GC901 | GC902 | GC903 | GC904 | GC905 | GC906 | GC907 | GC908 | GC909 | GC910 | GC911 | GC912 | GC913 | GC914 | GC915 | GC916 | GC917 | GC918 | GC919 | GC920 | GC921 | GC922 | GC923 | GC924 | GC925 | GC926 | GC927 | GC928 | GC929 | GC930 | GC931 | GC932 | GC933 | GC934 | GC935 | GC936 | GC937 | GC938 | GC939 | GC940 | GC941 | GC942 | GC943 | GC944 | GC945 | GC946 | GC947 | GC948 | GC949 | GC950 | GC951 |
|----|------|-----|-------|-----|--------|------|---------|-----------|--------|----|-----|-----|-----|-----|-----|-----|-----|------|------|------|------|------|------|------|------|------|------|------|------|------|------|------|------|------|------|------|------|------|------|------|------|------|------|------|------|------|------|------|------|------|------|------|------|------|------|------|------|------|------|------|------|------|------|------|------|------|------|------|------|------|------|------|------|------|------|------|------|------|------|------|------|------|------|------|------|------|------|------|------|------|------|------|------|------|------|------|------|------|------|------|------|------|------|------|------|------|------|-------|-------|-------|-------|-------|-------|-------|-------|-------|-------|-------|-------|-------|-------|-------|-------|-------|-------|-------|-------|-------|-------|-------|-------|-------|-------|-------|-------|-------|-------|-------|-------|-------|-------|-------|-------|-------|-------|-------|-------|-------|-------|-------|-------|-------|-------|-------|-------|-------|-------|-------|-------|-------|-------|-------|-------|-------|-------|-------|-------|-------|-------|-------|-------|-------|-------|-------|-------|-------|-------|-------|-------|-------|-------|-------|-------|-------|-------|-------|-------|-------|-------|-------|-------|-------|-------|-------|-------|-------|-------|-------|-------|-------|-------|-------|-------|-------|-------|-------|-------|-------|-------|-------|-------|-------|-------|-------|-------|-------|-------|-------|-------|-------|-------|-------|-------|-------|-------|-------|-------|-------|-------|-------|-------|-------|-------|-------|-------|-------|-------|-------|-------|-------|-------|-------|-------|-------|-------|-------|-------|-------|-------|-------|-------|-------|-------|-------|-------|-------|-------|-------|-------|-------|-------|-------|-------|-------|-------|-------|-------|-------|-------|-------|-------|-------|-------|-------|-------|-------|-------|-------|-------|-------|-------|-------|-------|-------|-------|-------|-------|-------|-------|-------|-------|-------|-------|-------|-------|-------|-------|-------|-------|-------|-------|-------|-------|-------|-------|-------|-------|-------|-------|-------|-------|-------|-------|-------|-------|-------|-------|-------|-------|-------|-------|-------|-------|-------|-------|-------|-------|-------|-------|-------|-------|-------|-------|-------|-------|-------|-------|-------|-------|-------|-------|-------|-------|-------|-------|-------|-------|-------|-------|-------|-------|-------|-------|-------|-------|-------|-------|-------|-------|-------|-------|-------|-------|-------|-------|-------|-------|-------|-------|-------|-------|-------|-------|-------|-------|-------|-------|-------|-------|-------|-------|-------|-------|-------|-------|-------|-------|-------|-------|-------|-------|-------|-------|-------|-------|-------|-------|-------|-------|-------|-------|-------|-------|-------|-------|-------|-------|-------|-------|-------|-------|-------|-------|-------|-------|-------|-------|-------|-------|-------|-------|-------|-------|-------|-------|-------|-------|-------|-------|-------|-------|-------|-------|-------|-------|-------|-------|-------|-------|-------|-------|-------|-------|-------|-------|-------|-------|-------|-------|-------|-------|-------|-------|-------|-------|-------|-------|-------|-------|-------|-------|-------|-------|-------|-------|-------|-------|-------|-------|-------|-------|-------|-------|-------|-------|-------|-------|-------|-------|-------|-------|-------|-------|-------|-------|-------|-------|-------|-------|-------|-------|-------|-------|-------|-------|-------|-------|-------|-------|-------|-------|-------|-------|-------|-------|-------|-------|-------|-------|-------|-------|-------|-------|-------|-------|-------|-------|-------|-------|-------|-------|-------|-------|-------|-------|-------|-------|-------|-------|-------|-------|-------|-------|-------|-------|-------|-------|-------|-------|-------|-------|-------|-------|-------|-------|-------|-------|-------|-------|-------|-------|-------|-------|-------|-------|-------|-------|-------|-------|-------|-------|-------|-------|-------|-------|-------|-------|-------|-------|-------|-------|-------|-------|-------|-------|-------|-------|-------|-------|-------|-------|-------|-------|-------|-------|-------|-------|-------|-------|-------|-------|-------|-------|-------|-------|-------|-------|-------|-------|-------|-------|-------|-------|-------|-------|-------|-------|-------|-------|-------|-------|-------|-------|-------|-------|-------|-------|-------|-------|-------|-------|-------|-------|-------|-------|-------|-------|-------|-------|-------|-------|-------|-------|-------|-------|-------|-------|-------|-------|-------|-------|-------|-------|-------|-------|-------|-------|-------|-------|-------|-------|-------|-------|-------|-------|-------|-------|-------|-------|-------|-------|-------|-------|-------|-------|-------|-------|-------|-------|-------|-------|-------|-------|-------|-------|-------|-------|-------|-------|-------|-------|-------|-------|-------|-------|-------|-------|-------|-------|-------|-------|-------|-------|-------|-------|-------|-------|-------|-------|-------|-------|-------|-------|-------|-------|-------|-------|-------|-------|-------|-------|-------|-------|-------|-------|-------|-------|-------|-------|-------|-------|-------|-------|-------|-------|-------|-------|-------|-------|-------|-------|-------|-------|-------|-------|-------|-------|-------|-------|-------|-------|-------|-------|-------|-------|-------|-------|-------|-------|-------|-------|-------|-------|-------|-------|-------|-------|-------|-------|-------|-------|-------|-------|-------|-------|-------|-------|-------|-------|-------|-------|-------|-------|-------|-------|-------|-------|-------|-------|-------|-------|-------|-------|-------|-------|-------|-------|-------|-------|-------|-------|-------|-------|-------|-------|-------|-------|-------|-------|-------|-------|-------|-------|-------|-------|-------|-------|-------|-------|-------|-------|-------|-------|-------|-------|-------|-------|-------|-------|-------|-------|-------|-------|-------|-------|-------|-------|-------|-------|-------|-------|-------|-------|-------|-------|-------|-------|-------|-------|-------|-------|-------|-------|-------|-------|-------|-------|-------|-------|-------|-------|-------|-------|-------|-------|-------|-------|-------|-------|-------|-------|-------|-------|-------|-------|-------|-------|-------|-------|-------|-------|-------|-------|-------|-------|-------|-------|-------|-------|-------|-------|-------|-------|-------|-------|-------|-------|-------|-------|-------|-------|-------|-------|-------|-------|-------|-------|-------|-------|-------|-------|-------|-------|-------|-------|-------|-------|-------|-------|-------|-------|-------|-------|-------|-------|-------|-------|-------|-------|-------|-------|-------|-------|-------|-------|-------|-------|-------|-------|-------|-------|-------|-------|-------|-------|-------|-------|-------|-------|-------|-------|-------|-------|-------|-------|-------|-------|-------|-------|-------|-------|-------|-------|-------|-------|-------|-------|-------|-------|
|----|------|-----|-------|-----|--------|------|---------|-----------|--------|----|-----|-----|-----|-----|-----|-----|-----|------|------|------|------|------|------|------|------|------|------|------|------|------|------|------|------|------|------|------|------|------|------|------|------|------|------|------|------|------|------|------|------|------|------|------|------|------|------|------|------|------|------|------|------|------|------|------|------|------|------|------|------|------|------|------|------|------|------|------|------|------|------|------|------|------|------|------|------|------|------|------|------|------|------|------|------|------|------|------|------|------|------|------|------|------|------|------|------|------|------|-------|-------|-------|-------|-------|-------|-------|-------|-------|-------|-------|-------|-------|-------|-------|-------|-------|-------|-------|-------|-------|-------|-------|-------|-------|-------|-------|-------|-------|-------|-------|-------|-------|-------|-------|-------|-------|-------|-------|-------|-------|-------|-------|-------|-------|-------|-------|-------|-------|-------|-------|-------|-------|-------|-------|-------|-------|-------|-------|-------|-------|-------|-------|-------|-------|-------|-------|-------|-------|-------|-------|-------|-------|-------|-------|-------|-------|-------|-------|-------|-------|-------|-------|-------|-------|-------|-------|-------|-------|-------|-------|-------|-------|-------|-------|-------|-------|-------|-------|-------|-------|-------|-------|-------|-------|-------|-------|-------|-------|-------|-------|-------|-------|-------|-------|-------|-------|-------|-------|-------|-------|-------|-------|-------|-------|-------|-------|-------|-------|-------|-------|-------|-------|-------|-------|-------|-------|-------|-------|-------|-------|-------|-------|-------|-------|-------|-------|-------|-------|-------|-------|-------|-------|-------|-------|-------|-------|-------|-------|-------|-------|-------|-------|-------|-------|-------|-------|-------|-------|-------|-------|-------|-------|-------|-------|-------|-------|-------|-------|-------|-------|-------|-------|-------|-------|-------|-------|-------|-------|-------|-------|-------|-------|-------|-------|-------|-------|-------|-------|-------|-------|-------|-------|-------|-------|-------|-------|-------|-------|-------|-------|-------|-------|-------|-------|-------|-------|-------|-------|-------|-------|-------|-------|-------|-------|-------|-------|-------|-------|-------|-------|-------|-------|-------|-------|-------|-------|-------|-------|-------|-------|-------|-------|-------|-------|-------|-------|-------|-------|-------|-------|-------|-------|-------|-------|-------|-------|-------|-------|-------|-------|-------|-------|-------|-------|-------|-------|-------|-------|-------|-------|-------|-------|-------|-------|-------|-------|-------|-------|-------|-------|-------|-------|-------|-------|-------|-------|-------|-------|-------|-------|-------|-------|-------|-------|-------|-------|-------|-------|-------|-------|-------|-------|-------|-------|-------|-------|-------|-------|-------|-------|-------|-------|-------|-------|-------|-------|-------|-------|-------|-------|-------|-------|-------|-------|-------|-------|-------|-------|-------|-------|-------|-------|-------|-------|-------|-------|-------|-------|-------|-------|-------|-------|-------|-------|-------|-------|-------|-------|-------|-------|-------|-------|-------|-------|-------|-------|-------|-------|-------|-------|-------|-------|-------|-------|-------|-------|-------|-------|-------|-------|-------|-------|-------|-------|-------|-------|-------|-------|-------|-------|-------|-------|-------|-------|-------|-------|-------|-------|-------|-------|-------|-------|-------|-------|-------|-------|-------|-------|-------|-------|-------|-------|-------|-------|-------|-------|-------|-------|-------|-------|-------|-------|-------|-------|-------|-------|-------|-------|-------|-------|-------|-------|-------|-------|-------|-------|-------|-------|-------|-------|-------|-------|-------|-------|-------|-------|-------|-------|-------|-------|-------|-------|-------|-------|-------|-------|-------|-------|-------|-------|-------|-------|-------|-------|-------|-------|-------|-------|-------|-------|-------|-------|-------|-------|-------|-------|-------|-------|-------|-------|-------|-------|-------|-------|-------|-------|-------|-------|-------|-------|-------|-------|-------|-------|-------|-------|-------|-------|-------|-------|-------|-------|-------|-------|-------|-------|-------|-------|-------|-------|-------|-------|-------|-------|-------|-------|-------|-------|-------|-------|-------|-------|-------|-------|-------|-------|-------|-------|-------|-------|-------|-------|-------|-------|-------|-------|-------|-------|-------|-------|-------|-------|-------|-------|-------|-------|-------|-------|-------|-------|-------|-------|-------|-------|-------|-------|-------|-------|-------|-------|-------|-------|-------|-------|-------|-------|-------|-------|-------|-------|-------|-------|-------|-------|-------|-------|-------|-------|-------|-------|-------|-------|-------|-------|-------|-------|-------|-------|-------|-------|-------|-------|-------|-------|-------|-------|-------|-------|-------|-------|-------|-------|-------|-------|-------|-------|-------|-------|-------|-------|-------|-------|-------|-------|-------|-------|-------|-------|-------|-------|-------|-------|-------|-------|-------|-------|-------|-------|-------|-------|-------|-------|-------|-------|-------|-------|-------|-------|-------|-------|-------|-------|-------|-------|-------|-------|-------|-------|-------|-------|-------|-------|-------|-------|-------|-------|-------|-------|-------|-------|-------|-------|-------|-------|-------|-------|-------|-------|-------|-------|-------|-------|-------|-------|-------|-------|-------|-------|-------|-------|-------|-------|-------|-------|-------|-------|-------|-------|-------|-------|-------|-------|-------|-------|-------|-------|-------|-------|-------|-------|-------|-------|-------|-------|-------|-------|-------|-------|-------|-------|-------|-------|-------|-------|-------|-------|-------|-------|-------|-------|-------|-------|-------|-------|-------|-------|-------|-------|-------|-------|-------|-------|-------|-------|-------|-------|-------|-------|-------|-------|-------|-------|-------|-------|-------|-------|-------|-------|-------|-------|-------|-------|-------|-------|-------|-------|-------|-------|-------|-------|-------|-------|-------|-------|-------|-------|-------|-------|-------|-------|-------|-------|-------|-------|-------|-------|-------|-------|-------|-------|-------|-------|-------|-------|-------|-------|-------|-------|-------|-------|-------|-------|-------|-------|-------|-------|-------|-------|-------|-------|-------|-------|-------|-------|-------|-------|-------|-------|-------|-------|-------|-------|-------|-------|-------|-------|-------|-------|-------|-------|-------|-------|-------|-------|-------|-------|-------|-------|-------|-------|-------|-------|-------|-------|-------|-------|-------|-------|-------|-------|-------|-------|-------|-------|-------|-------|-------|-------|-------|-------|-------|-------|-------|-------|-------|-------|-------|-------|-------|-------|-------|

| ID | Name | Seq | Start | End | Strand | Gene | Product | Accession | Length | GC | GC3 | GC4 | GC5 | GC6 | GC7 | GC8 | GC9 | GC10 | GC11 | GC12 | GC13 | GC14 | GC15 | GC16 | GC17 | GC18 | GC19 | GC20 | GC21 | GC22 | GC23 | GC24 | GC25 | GC26 | GC27 | GC28 | GC29 | GC30 | GC31 | GC32 | GC33 | GC34 | GC35 | GC36 | GC37 | GC38 | GC39 | GC40 | GC41 | GC42 | GC43 | GC44 | GC45 | GC46 | GC47 | GC48 | GC49 | GC50 | GC51 | GC52 | GC53 | GC54 | GC55 | GC56 | GC57 | GC58 | GC59 | GC60 | GC61 | GC62 | GC63 | GC64 | GC65 | GC66 | GC67 | GC68 | GC69 | GC70 | GC71 | GC72 | GC73 | GC74 | GC75 | GC76 | GC77 | GC78 | GC79 | GC80 | GC81 | GC82 | GC83 | GC84 | GC85 | GC86 | GC87 | GC88 | GC89 | GC90 | GC91 | GC92 | GC93 | GC94 | GC95 | GC96 | GC97 | GC98 | GC99 | GC100 | GC101 | GC102 | GC103 | GC104 | GC105 | GC106 | GC107 | GC108 | GC109 | GC110 | GC111 | GC112 | GC113 | GC114 | GC115 | GC116 | GC117 | GC118 | GC119 | GC120 | GC121 | GC122 | GC123 | GC124 | GC125 | GC126 | GC127 | GC128 | GC129 | GC130 | GC131 | GC132 | GC133 | GC134 | GC135 | GC136 | GC137 | GC138 | GC139 | GC140 | GC141 | GC142 | GC143 | GC144 | GC145 | GC146 | GC147 | GC148 | GC149 | GC150 | GC151 | GC152 | GC153 | GC154 | GC155 | GC156 | GC157 | GC158 | GC159 | GC160 | GC161 | GC162 | GC163 | GC164 | GC165 | GC166 | GC167 | GC168 | GC169 | GC170 | GC171 | GC172 | GC173 | GC174 | GC175 | GC176 | GC177 | GC178 | GC179 | GC180 | GC181 | GC182 | GC183 | GC184 | GC185 | GC186 | GC187 | GC188 | GC189 | GC190 | GC191 | GC192 | GC193 | GC194 | GC195 | GC196 | GC197 | GC198 | GC199 | GC200 | GC201 | GC202 | GC203 | GC204 | GC205 | GC206 | GC207 | GC208 | GC209 | GC210 | GC211 | GC212 | GC213 | GC214 | GC215 | GC216 | GC217 | GC218 | GC219 | GC220 | GC221 | GC222 | GC223 | GC224 | GC225 | GC226 | GC227 | GC228 | GC229 | GC230 | GC231 | GC232 | GC233 | GC234 | GC235 | GC236 | GC237 | GC238 | GC239 | GC240 | GC241 | GC242 | GC243 | GC244 | GC245 | GC246 | GC247 | GC248 | GC249 | GC250 | GC251 | GC252 | GC253 | GC254 | GC255 | GC256 | GC257 | GC258 | GC259 | GC260 | GC261 | GC262 | GC263 | GC264 | GC265 | GC266 | GC267 | GC268 | GC269 | GC270 | GC271 | GC272 | GC273 | GC274 | GC275 | GC276 | GC277 | GC278 | GC279 | GC280 | GC281 | GC282 | GC283 | GC284 | GC285 | GC286 | GC287 | GC288 | GC289 | GC290 | GC291 | GC292 | GC293 | GC294 | GC295 | GC296 | GC297 | GC298 | GC299 | GC300 | GC301 | GC302 | GC303 | GC304 | GC305 | GC306 | GC307 | GC308 | GC309 | GC310 | GC311 | GC312 | GC313 | GC314 | GC315 | GC316 | GC317 | GC318 | GC319 | GC320 | GC321 | GC322 | GC323 | GC324 | GC325 | GC326 | GC327 | GC328 | GC329 | GC330 | GC331 | GC332 | GC333 | GC334 | GC335 | GC336 | GC337 | GC338 | GC339 | GC340 | GC341 | GC342 | GC343 | GC344 | GC345 | GC346 | GC347 | GC348 | GC349 | GC350 | GC351 | GC352 | GC353 | GC354 | GC355 | GC356 | GC357 | GC358 | GC359 | GC360 | GC361 | GC362 | GC363 | GC364 | GC365 | GC366 | GC367 | GC368 | GC369 | GC370 | GC371 | GC372 | GC373 | GC374 | GC375 | GC376 | GC377 | GC378 | GC379 | GC380 | GC381 | GC382 | GC383 | GC384 | GC385 | GC386 | GC387 | GC388 | GC389 | GC390 | GC391 | GC392 | GC393 | GC394 | GC395 | GC396 | GC397 | GC398 | GC399 | GC400 | GC401 | GC402 | GC403 | GC404 | GC405 | GC406 | GC407 | GC408 | GC409 | GC410 | GC411 | GC412 | GC413 | GC414 | GC415 | GC416 | GC417 | GC418 | GC419 | GC420 | GC421 | GC422 | GC423 | GC424 | GC425 | GC426 | GC427 | GC428 | GC429 | GC430 | GC431 | GC432 | GC433 | GC434 | GC435 | GC436 | GC437 | GC438 | GC439 | GC440 | GC441 | GC442 | GC443 | GC444 | GC445 | GC446 | GC447 | GC448 | GC449 | GC450 | GC451 | GC452 | GC453 | GC454 | GC455 | GC456 | GC457 | GC458 | GC459 | GC460 | GC461 | GC462 | GC463 | GC464 | GC465 | GC466 | GC467 | GC468 | GC469 | GC470 | GC471 | GC472 | GC473 | GC474 | GC475 | GC476 | GC477 | GC478 | GC479 | GC480 | GC481 | GC482 | GC483 | GC484 | GC485 | GC486 | GC487 | GC488 | GC489 | GC490 | GC491 | GC492 | GC493 | GC494 | GC495 | GC496 | GC497 | GC498 | GC499 | GC500 | GC501 | GC502 | GC503 | GC504 | GC505 | GC506 | GC507 | GC508 | GC509 | GC510 | GC511 | GC512 | GC513 | GC514 | GC515 | GC516 | GC517 | GC518 | GC519 | GC520 | GC521 | GC522 | GC523 | GC524 | GC525 | GC526 | GC527 | GC528 | GC529 | GC530 | GC531 | GC532 | GC533 | GC534 | GC535 | GC536 | GC537 | GC538 | GC539 | GC540 | GC541 | GC542 | GC543 | GC544 | GC545 | GC546 | GC547 | GC548 | GC549 | GC550 | GC551 | GC552 | GC553 | GC554 | GC555 | GC556 | GC557 | GC558 | GC559 | GC560 | GC561 | GC562 | GC563 | GC564 | GC565 | GC566 | GC567 | GC568 | GC569 | GC570 | GC571 | GC572 | GC573 | GC574 | GC575 | GC576 | GC577 | GC578 | GC579 | GC580 | GC581 | GC582 | GC583 | GC584 | GC585 | GC586 | GC587 | GC588 | GC589 | GC590 | GC591 | GC592 | GC593 | GC594 | GC595 | GC596 | GC597 | GC598 | GC599 | GC600 | GC601 | GC602 | GC603 | GC604 | GC605 | GC606 | GC607 | GC608 | GC609 | GC610 | GC611 | GC612 | GC613 | GC614 | GC615 | GC616 | GC617 | GC618 | GC619 | GC620 | GC621 | GC622 | GC623 | GC624 | GC625 | GC626 | GC627 | GC628 | GC629 | GC630 | GC631 | GC632 | GC633 | GC634 | GC635 | GC636 | GC637 | GC638 | GC639 | GC640 | GC641 | GC642 | GC643 | GC644 | GC645 | GC646 | GC647 | GC648 | GC649 | GC650 | GC651 | GC652 | GC653 | GC654 | GC655 | GC656 | GC657 | GC658 | GC659 | GC660 | GC661 | GC662 | GC663 | GC664 | GC665 | GC666 | GC667 | GC668 | GC669 | GC670 | GC671 | GC672 | GC673 | GC674 | GC675 | GC676 | GC677 | GC678 | GC679 | GC680 | GC681 | GC682 | GC683 | GC684 | GC685 | GC686 | GC687 | GC688 | GC689 | GC690 | GC691 | GC692 | GC693 | GC694 | GC695 | GC696 | GC697 | GC698 | GC699 | GC700 | GC701 | GC702 | GC703 | GC704 | GC705 | GC706 | GC707 | GC708 | GC709 | GC710 | GC711 | GC712 | GC713 | GC714 | GC715 | GC716 | GC717 | GC718 | GC719 | GC720 | GC721 | GC722 | GC723 | GC724 | GC725 | GC726 | GC727 | GC728 | GC729 | GC730 | GC731 | GC732 | GC733 | GC734 | GC735 | GC736 | GC737 | GC738 | GC739 | GC740 | GC741 | GC742 | GC743 | GC744 | GC745 | GC746 | GC747 | GC748 | GC749 | GC750 | GC751 | GC752 | GC753 | GC754 | GC755 | GC756 | GC757 | GC758 | GC759 | GC760 | GC761 | GC762 | GC763 | GC764 | GC765 | GC766 | GC767 | GC768 | GC769 | GC770 | GC771 | GC772 | GC773 | GC774 | GC775 | GC776 | GC777 | GC778 | GC779 | GC780 | GC781 | GC782 | GC783 | GC784 | GC785 | GC786 | GC787 | GC788 | GC789 | GC790 | GC791 | GC792 | GC793 | GC794 | GC795 | GC796 | GC797 | GC798 | GC799 | GC800 | GC801 | GC802 | GC803 | GC804 | GC805 | GC806 | GC807 | GC808 | GC809 | GC810 | GC811 | GC812 | GC813 | GC814 | GC815 | GC816 | GC817 | GC818 | GC819 | GC820 | GC821 | GC822 | GC823 | GC824 | GC825 | GC826 | GC827 | GC828 | GC829 | GC830 | GC831 | GC832 | GC833 | GC834 | GC835 | GC836 | GC837 | GC838 | GC839 | GC840 | GC841 | GC842 | GC843 | GC844 | GC845 | GC846 | GC847 | GC848 | GC849 | GC850 | GC851 | GC852 | GC853 | GC854 | GC855 | GC856 | GC857 | GC858 | GC859 | GC860 | GC861 | GC862 | GC863 | GC864 | GC865 | GC866 | GC867 | GC868 | GC869 | GC870 | GC871 | GC872 | GC873 | GC874 | GC875 | GC876 | GC877 | GC878 | GC879 | GC880 | GC881 | GC882 | GC883 | GC884 | GC885 | GC886 | GC887 | GC888 | GC889 | GC890 | GC891 | GC892 | GC893 | GC894 | GC895 | GC896 | GC897 | GC898 | GC899 | GC900 | GC901 | GC902 | GC903 | GC904 | GC905 | GC906 | GC907 | GC908 | GC909 | GC910 | GC911 | GC912 | GC913 | GC914 | GC915 | GC916 | GC917 | GC918 | GC919 | GC920 | GC921 | GC922 | GC923 | GC924 | GC925 | GC926 | GC927 | GC928 | GC929 | GC930 | GC931 | GC932 | GC933 | GC934 | GC935 | GC936 | GC937 | GC938 | GC939 | GC940 | GC941 | GC942 | GC943 | GC944 | GC945 | GC946 | GC947 | GC948 | GC949 | GC950 | GC951 |
|----|------|-----|-------|-----|--------|------|---------|-----------|--------|----|-----|-----|-----|-----|-----|-----|-----|------|------|------|------|------|------|------|------|------|------|------|------|------|------|------|------|------|------|------|------|------|------|------|------|------|------|------|------|------|------|------|------|------|------|------|------|------|------|------|------|------|------|------|------|------|------|------|------|------|------|------|------|------|------|------|------|------|------|------|------|------|------|------|------|------|------|------|------|------|------|------|------|------|------|------|------|------|------|------|------|------|------|------|------|------|------|------|------|------|------|-------|-------|-------|-------|-------|-------|-------|-------|-------|-------|-------|-------|-------|-------|-------|-------|-------|-------|-------|-------|-------|-------|-------|-------|-------|-------|-------|-------|-------|-------|-------|-------|-------|-------|-------|-------|-------|-------|-------|-------|-------|-------|-------|-------|-------|-------|-------|-------|-------|-------|-------|-------|-------|-------|-------|-------|-------|-------|-------|-------|-------|-------|-------|-------|-------|-------|-------|-------|-------|-------|-------|-------|-------|-------|-------|-------|-------|-------|-------|-------|-------|-------|-------|-------|-------|-------|-------|-------|-------|-------|-------|-------|-------|-------|-------|-------|-------|-------|-------|-------|-------|-------|-------|-------|-------|-------|-------|-------|-------|-------|-------|-------|-------|-------|-------|-------|-------|-------|-------|-------|-------|-------|-------|-------|-------|-------|-------|-------|-------|-------|-------|-------|-------|-------|-------|-------|-------|-------|-------|-------|-------|-------|-------|-------|-------|-------|-------|-------|-------|-------|-------|-------|-------|-------|-------|-------|-------|-------|-------|-------|-------|-------|-------|-------|-------|-------|-------|-------|-------|-------|-------|-------|-------|-------|-------|-------|-------|-------|-------|-------|-------|-------|-------|-------|-------|-------|-------|-------|-------|-------|-------|-------|-------|-------|-------|-------|-------|-------|-------|-------|-------|-------|-------|-------|-------|-------|-------|-------|-------|-------|-------|-------|-------|-------|-------|-------|-------|-------|-------|-------|-------|-------|-------|-------|-------|-------|-------|-------|-------|-------|-------|-------|-------|-------|-------|-------|-------|-------|-------|-------|-------|-------|-------|-------|-------|-------|-------|-------|-------|-------|-------|-------|-------|-------|-------|-------|-------|-------|-------|-------|-------|-------|-------|-------|-------|-------|-------|-------|-------|-------|-------|-------|-------|-------|-------|-------|-------|-------|-------|-------|-------|-------|-------|-------|-------|-------|-------|-------|-------|-------|-------|-------|-------|-------|-------|-------|-------|-------|-------|-------|-------|-------|-------|-------|-------|-------|-------|-------|-------|-------|-------|-------|-------|-------|-------|-------|-------|-------|-------|-------|-------|-------|-------|-------|-------|-------|-------|-------|-------|-------|-------|-------|-------|-------|-------|-------|-------|-------|-------|-------|-------|-------|-------|-------|-------|-------|-------|-------|-------|-------|-------|-------|-------|-------|-------|-------|-------|-------|-------|-------|-------|-------|-------|-------|-------|-------|-------|-------|-------|-------|-------|-------|-------|-------|-------|-------|-------|-------|-------|-------|-------|-------|-------|-------|-------|-------|-------|-------|-------|-------|-------|-------|-------|-------|-------|-------|-------|-------|-------|-------|-------|-------|-------|-------|-------|-------|-------|-------|-------|-------|-------|-------|-------|-------|-------|-------|-------|-------|-------|-------|-------|-------|-------|-------|-------|-------|-------|-------|-------|-------|-------|-------|-------|-------|-------|-------|-------|-------|-------|-------|-------|-------|-------|-------|-------|-------|-------|-------|-------|-------|-------|-------|-------|-------|-------|-------|-------|-------|-------|-------|-------|-------|-------|-------|-------|-------|-------|-------|-------|-------|-------|-------|-------|-------|-------|-------|-------|-------|-------|-------|-------|-------|-------|-------|-------|-------|-------|-------|-------|-------|-------|-------|-------|-------|-------|-------|-------|-------|-------|-------|-------|-------|-------|-------|-------|-------|-------|-------|-------|-------|-------|-------|-------|-------|-------|-------|-------|-------|-------|-------|-------|-------|-------|-------|-------|-------|-------|-------|-------|-------|-------|-------|-------|-------|-------|-------|-------|-------|-------|-------|-------|-------|-------|-------|-------|-------|-------|-------|-------|-------|-------|-------|-------|-------|-------|-------|-------|-------|-------|-------|-------|-------|-------|-------|-------|-------|-------|-------|-------|-------|-------|-------|-------|-------|-------|-------|-------|-------|-------|-------|-------|-------|-------|-------|-------|-------|-------|-------|-------|-------|-------|-------|-------|-------|-------|-------|-------|-------|-------|-------|-------|-------|-------|-------|-------|-------|-------|-------|-------|-------|-------|-------|-------|-------|-------|-------|-------|-------|-------|-------|-------|-------|-------|-------|-------|-------|-------|-------|-------|-------|-------|-------|-------|-------|-------|-------|-------|-------|-------|-------|-------|-------|-------|-------|-------|-------|-------|-------|-------|-------|-------|-------|-------|-------|-------|-------|-------|-------|-------|-------|-------|-------|-------|-------|-------|-------|-------|-------|-------|-------|-------|-------|-------|-------|-------|-------|-------|-------|-------|-------|-------|-------|-------|-------|-------|-------|-------|-------|-------|-------|-------|-------|-------|-------|-------|-------|-------|-------|-------|-------|-------|-------|-------|-------|-------|-------|-------|-------|-------|-------|-------|-------|-------|-------|-------|-------|-------|-------|-------|-------|-------|-------|-------|-------|-------|-------|-------|-------|-------|-------|-------|-------|-------|-------|-------|-------|-------|-------|-------|-------|-------|-------|-------|-------|-------|-------|-------|-------|-------|-------|-------|-------|-------|-------|-------|-------|-------|-------|-------|-------|-------|-------|-------|-------|-------|-------|-------|-------|-------|-------|-------|-------|-------|-------|-------|-------|-------|-------|-------|-------|-------|-------|-------|-------|-------|-------|-------|-------|-------|-------|-------|-------|-------|-------|-------|-------|-------|-------|-------|-------|-------|-------|-------|-------|-------|-------|-------|-------|-------|-------|-------|-------|-------|-------|-------|-------|-------|-------|-------|-------|-------|-------|-------|-------|-------|-------|-------|-------|-------|-------|-------|-------|-------|-------|-------|-------|-------|-------|-------|-------|-------|-------|-------|-------|-------|-------|-------|-------|-------|-------|-------|-------|
|----|------|-----|-------|-----|--------|------|---------|-----------|--------|----|-----|-----|-----|-----|-----|-----|-----|------|------|------|------|------|------|------|------|------|------|------|------|------|------|------|------|------|------|------|------|------|------|------|------|------|------|------|------|------|------|------|------|------|------|------|------|------|------|------|------|------|------|------|------|------|------|------|------|------|------|------|------|------|------|------|------|------|------|------|------|------|------|------|------|------|------|------|------|------|------|------|------|------|------|------|------|------|------|------|------|------|------|------|------|------|------|------|------|------|------|-------|-------|-------|-------|-------|-------|-------|-------|-------|-------|-------|-------|-------|-------|-------|-------|-------|-------|-------|-------|-------|-------|-------|-------|-------|-------|-------|-------|-------|-------|-------|-------|-------|-------|-------|-------|-------|-------|-------|-------|-------|-------|-------|-------|-------|-------|-------|-------|-------|-------|-------|-------|-------|-------|-------|-------|-------|-------|-------|-------|-------|-------|-------|-------|-------|-------|-------|-------|-------|-------|-------|-------|-------|-------|-------|-------|-------|-------|-------|-------|-------|-------|-------|-------|-------|-------|-------|-------|-------|-------|-------|-------|-------|-------|-------|-------|-------|-------|-------|-------|-------|-------|-------|-------|-------|-------|-------|-------|-------|-------|-------|-------|-------|-------|-------|-------|-------|-------|-------|-------|-------|-------|-------|-------|-------|-------|-------|-------|-------|-------|-------|-------|-------|-------|-------|-------|-------|-------|-------|-------|-------|-------|-------|-------|-------|-------|-------|-------|-------|-------|-------|-------|-------|-------|-------|-------|-------|-------|-------|-------|-------|-------|-------|-------|-------|-------|-------|-------|-------|-------|-------|-------|-------|-------|-------|-------|-------|-------|-------|-------|-------|-------|-------|-------|-------|-------|-------|-------|-------|-------|-------|-------|-------|-------|-------|-------|-------|-------|-------|-------|-------|-------|-------|-------|-------|-------|-------|-------|-------|-------|-------|-------|-------|-------|-------|-------|-------|-------|-------|-------|-------|-------|-------|-------|-------|-------|-------|-------|-------|-------|-------|-------|-------|-------|-------|-------|-------|-------|-------|-------|-------|-------|-------|-------|-------|-------|-------|-------|-------|-------|-------|-------|-------|-------|-------|-------|-------|-------|-------|-------|-------|-------|-------|-------|-------|-------|-------|-------|-------|-------|-------|-------|-------|-------|-------|-------|-------|-------|-------|-------|-------|-------|-------|-------|-------|-------|-------|-------|-------|-------|-------|-------|-------|-------|-------|-------|-------|-------|-------|-------|-------|-------|-------|-------|-------|-------|-------|-------|-------|-------|-------|-------|-------|-------|-------|-------|-------|-------|-------|-------|-------|-------|-------|-------|-------|-------|-------|-------|-------|-------|-------|-------|-------|-------|-------|-------|-------|-------|-------|-------|-------|-------|-------|-------|-------|-------|-------|-------|-------|-------|-------|-------|-------|-------|-------|-------|-------|-------|-------|-------|-------|-------|-------|-------|-------|-------|-------|-------|-------|-------|-------|-------|-------|-------|-------|-------|-------|-------|-------|-------|-------|-------|-------|-------|-------|-------|-------|-------|-------|-------|-------|-------|-------|-------|-------|-------|-------|-------|-------|-------|-------|-------|-------|-------|-------|-------|-------|-------|-------|-------|-------|-------|-------|-------|-------|-------|-------|-------|-------|-------|-------|-------|-------|-------|-------|-------|-------|-------|-------|-------|-------|-------|-------|-------|-------|-------|-------|-------|-------|-------|-------|-------|-------|-------|-------|-------|-------|-------|-------|-------|-------|-------|-------|-------|-------|-------|-------|-------|-------|-------|-------|-------|-------|-------|-------|-------|-------|-------|-------|-------|-------|-------|-------|-------|-------|-------|-------|-------|-------|-------|-------|-------|-------|-------|-------|-------|-------|-------|-------|-------|-------|-------|-------|-------|-------|-------|-------|-------|-------|-------|-------|-------|-------|-------|-------|-------|-------|-------|-------|-------|-------|-------|-------|-------|-------|-------|-------|-------|-------|-------|-------|-------|-------|-------|-------|-------|-------|-------|-------|-------|-------|-------|-------|-------|-------|-------|-------|-------|-------|-------|-------|-------|-------|-------|-------|-------|-------|-------|-------|-------|-------|-------|-------|-------|-------|-------|-------|-------|-------|-------|-------|-------|-------|-------|-------|-------|-------|-------|-------|-------|-------|-------|-------|-------|-------|-------|-------|-------|-------|-------|-------|-------|-------|-------|-------|-------|-------|-------|-------|-------|-------|-------|-------|-------|-------|-------|-------|-------|-------|-------|-------|-------|-------|-------|-------|-------|-------|-------|-------|-------|-------|-------|-------|-------|-------|-------|-------|-------|-------|-------|-------|-------|-------|-------|-------|-------|-------|-------|-------|-------|-------|-------|-------|-------|-------|-------|-------|-------|-------|-------|-------|-------|-------|-------|-------|-------|-------|-------|-------|-------|-------|-------|-------|-------|-------|-------|-------|-------|-------|-------|-------|-------|-------|-------|-------|-------|-------|-------|-------|-------|-------|-------|-------|-------|-------|-------|-------|-------|-------|-------|-------|-------|-------|-------|-------|-------|-------|-------|-------|-------|-------|-------|-------|-------|-------|-------|-------|-------|-------|-------|-------|-------|-------|-------|-------|-------|-------|-------|-------|-------|-------|-------|-------|-------|-------|-------|-------|-------|-------|-------|-------|-------|-------|-------|-------|-------|-------|-------|-------|-------|-------|-------|-------|-------|-------|-------|-------|-------|-------|-------|-------|-------|-------|-------|-------|-------|-------|-------|-------|-------|-------|-------|-------|-------|-------|-------|-------|-------|-------|-------|-------|-------|-------|-------|-------|-------|-------|-------|-------|-------|-------|-------|-------|-------|-------|-------|-------|-------|-------|-------|-------|-------|-------|-------|-------|-------|-------|-------|-------|-------|-------|-------|-------|-------|-------|-------|-------|-------|-------|-------|-------|-------|-------|-------|-------|-------|-------|-------|-------|-------|-------|-------|-------|-------|-------|-------|-------|-------|-------|-------|-------|-------|-------|-------|-------|-------|-------|-------|-------|-------|-------|-------|-------|-------|-------|-------|-------|-------|-------|-------|-------|-------|-------|-------|-------|-------|-------|-------|-------|-------|-------|-------|











| Accession | Organism                                                                                                       | Gene | Sequence | Start | End | Strand | Protein Group   | Protein Group Accession | Protein Name | Start  | End   | Strand | Value        | PPV      | Score | Exp Value | Change | MIS (D) | AM (D) | RT (D) | # Missed |  |
|-----------|----------------------------------------------------------------------------------------------------------------|------|----------|-------|-----|--------|-----------------|-------------------------|--------------|--------|-------|--------|--------------|----------|-------|-----------|--------|---------|--------|--------|----------|--|
| F7291     | S1128 protein OS-Spermatophyta sp. (strain PCC 885) / Acanthaceae/Chlorophyta                                  | AD   | Sequence | 3527  | 430 | +      | # Protein Group | Protein Group Accession | Heublandin   | 2      | 1020  | 2      | 144155 Count | 11.5     | 248   | 23.6      | 0.11   |         |        |        |          |  |
|           |                                                                                                                |      | High     | 1     | 1   | 1      | 1               | 1                       | 1            | 0.0000 | 1.148 | 1      | 0            | 0.000750 | 25    | 102.9420  | -0.29  | 15.50   |        |        |          |  |
|           |                                                                                                                |      | Medium   | 1     | 1   | 1      | 1               | 1                       | 1            | 0.0000 | 0.916 | 1      | 0            | 0.000750 | 25    | 102.9420  | -0.29  | 15.50   |        |        |          |  |
| Q5274     | Yen shwee endocarp chlorophyll binding protein OS-Spermatophyta sp. (strain PCC 885) / Acanthaceae/Chlorophyta | AD   | Sequence | 3529  | 124 | +      | # Protein Group | Protein Group Accession | Heublandin   | 2      | 1017  | 2      | 144155 Count | 20.0     | 342   | 33.2      | 0.16   |         |        |        |          |  |
|           |                                                                                                                |      | High     | 1     | 1   | 1      | 1               | 1                       | 1            | 0.0000 | 1.098 | 1      | 0            | 0.000750 | 25    | 102.9420  | -0.29  | 15.50   |        |        |          |  |
|           |                                                                                                                |      | Medium   | 1     | 1   | 1      | 1               | 1                       | 1            | 0.0000 | 0.908 | 1      | 0            | 0.000750 | 25    | 102.9420  | -0.29  | 15.50   |        |        |          |  |
| F7297     | 3-antipyrone synthase OS-Spermatophyta sp. (strain PCC 885) / Acanthaceae/Chlorophyta                          | AD   | Sequence | 3515  | 185 | +      | # Protein Group | Protein Group Accession | Heublandin   | 4      | 1085  | 3      | 144155 Count | 11.1     | 361   | 38.8      | 0.18   |         |        |        |          |  |
|           |                                                                                                                |      | High     | 1     | 1   | 1      | 1               | 1                       | 1            | 0.0000 | 1.039 | 1      | 0            | 0.000750 | 25    | 102.9420  | -0.29  | 15.50   |        |        |          |  |
|           |                                                                                                                |      | Medium   | 1     | 1   | 1      | 1               | 1                       | 1            | 0.0000 | 0.988 | 1      | 0            | 0.000750 | 25    | 102.9420  | -0.29  | 15.50   |        |        |          |  |
| Q5284     | S1028 protein OS-Spermatophyta sp. (strain PCC 885) / Acanthaceae/Chlorophyta                                  | AD   | Sequence | 2847  | 125 | +      | # Protein Group | Protein Group Accession | Heublandin   | 2      | 1017  | 2      | 144155 Count | 20.0     | 342   | 33.2      | 0.16   |         |        |        |          |  |
|           |                                                                                                                |      | High     | 1     | 1   | 1      | 1               | 1                       | 1            | 0.0000 | 1.098 | 1      | 0            | 0.000750 | 25    | 102.9420  | -0.29  | 15.50   |        |        |          |  |
|           |                                                                                                                |      | Medium   | 1     | 1   | 1      | 1               | 1                       | 1            | 0.0000 | 0.908 | 1      | 0            | 0.000750 | 25    | 102.9420  | -0.29  | 15.50   |        |        |          |  |
| F7293     | Yen shwee SMC OS-Spermatophyta sp. (strain PCC 885) / Acanthaceae/Chlorophyta                                  | AD   | Sequence | 1154  | 134 | +      | # Protein Group | Protein Group Accession | Heublandin   | 2      | 1017  | 2      | 144155 Count | 19.2     | 327   | 33.2      | 0.16   |         |        |        |          |  |
|           |                                                                                                                |      | High     | 1     | 1   | 1      | 1               | 1                       | 1            | 0.0000 | 1.072 | 1      | 0            | 0.000750 | 25    | 102.9420  | -0.29  | 15.50   |        |        |          |  |
|           |                                                                                                                |      | Medium   | 1     | 1   | 1      | 1               | 1                       | 1            | 0.0000 | 0.921 | 1      | 0            | 0.000750 | 25    | 102.9420  | -0.29  | 15.50   |        |        |          |  |
| Q5285     | S1029 protein OS-Spermatophyta sp. (strain PCC 885) / Acanthaceae/Chlorophyta                                  | AD   | Sequence | 2142  | 121 | +      | # Protein Group | Protein Group Accession | Heublandin   | 2      | 1017  | 2      | 144155 Count | 13.8     | 237   | 23.6      | 0.11   |         |        |        |          |  |
|           |                                                                                                                |      | High     | 1     | 1   | 1      | 1               | 1                       | 1            | 0.0000 | 1.089 | 1      | 0            | 0.000750 | 25    | 102.9420  | -0.29  | 15.50   |        |        |          |  |
|           |                                                                                                                |      | Medium   | 1     | 1   | 1      | 1               | 1                       | 1            | 0.0000 | 0.989 | 1      | 0            | 0.000750 | 25    | 102.9420  | -0.29  | 15.50   |        |        |          |  |
| F7292     | Phenylpropanyl-4-glucosyltransferase OS-Spermatophyta sp. (strain PCC 885) / Acanthaceae/Chlorophyta           | AD   | Sequence | 2536  | 130 | +      | # Protein Group | Protein Group Accession | Heublandin   | 2      | 1017  | 2      | 144155 Count | 18.1     | 318   | 33.2      | 0.16   |         |        |        |          |  |
|           |                                                                                                                |      | High     | 1     | 1   | 1      | 1               | 1                       | 1            | 0.0000 | 1.139 | 1      | 0            | 0.000750 | 25    | 102.9420  | -0.29  | 15.50   |        |        |          |  |
|           |                                                                                                                |      | Medium   | 1     | 1   | 1      | 1               | 1                       | 1            | 0.0000 | 0.972 | 1      | 0            | 0.000750 | 25    | 102.9420  | -0.29  | 15.50   |        |        |          |  |
| F7295     | Stomatin factor 4 OS-Spermatophyta sp. (strain PCC 885) / Acanthaceae/Chlorophyta                              | AD   | Sequence | 3510  | 154 | +      | # Protein Group | Protein Group Accession | Heublandin   | 2      | 1017  | 2      | 144155 Count | 25.1     | 421   | 45.0      | 0.22   |         |        |        |          |  |
|           |                                                                                                                |      | High     | 1     | 1   | 1      | 1               | 1                       | 1            | 0.0000 | 1.047 | 1      | 0            | 0.000750 | 25    | 102.9420  | -0.29  | 15.50   |        |        |          |  |
|           |                                                                                                                |      | Medium   | 1     | 1   | 1      | 1               | 1                       | 1            | 0.0000 | 1.087 | 1      | 0            | 0.000750 | 25    | 102.9420  | -0.29  | 15.50   |        |        |          |  |
| F7290     | S1129 protein OS-Spermatophyta sp. (strain PCC 885) / Acanthaceae/Chlorophyta                                  | AD   | Sequence | 2617  | 136 | +      | # Protein Group | Protein Group Accession | Heublandin   | 2      | 1017  | 2      | 144155 Count | 17.8     | 318   | 33.2      | 0.16   |         |        |        |          |  |
|           |                                                                                                                |      | High     | 1     | 1   | 1      | 1               | 1                       | 1            | 0.0000 | 1.047 | 1      | 0            | 0.000750 | 25    | 102.9420  | -0.29  | 15.50   |        |        |          |  |
|           |                                                                                                                |      | Medium   | 1     | 1   | 1      | 1               | 1                       | 1            | 0.0000 | 0.998 | 1      | 0            | 0.000750 | 25    | 102.9420  | -0.29  | 15.50   |        |        |          |  |
| F7294     | Lmp chloro-ethyl acyl CoA ligase OS-Spermatophyta sp. (strain PCC 885) / Acanthaceae/Chlorophyta               | AD   | Sequence | 3526  | 138 | +      | # Protein Group | Protein Group Accession | Heublandin   | 2      | 1017  | 2      | 144155 Count | 15.8     | 288   | 30.0      | 0.14   |         |        |        |          |  |
|           |                                                                                                                |      | High     | 1     | 1   | 1      | 1               | 1                       | 1            | 0.0000 | 1.108 | 1      | 0            | 0.000750 | 25    | 102.9420  | -0.29  | 15.50   |        |        |          |  |
|           |                                                                                                                |      | Medium   | 1     | 1   | 1      | 1               | 1                       | 1            | 0.0000 | 1.425 | 1      | 0            | 0.000750 | 25    | 102.9420  | -0.29  | 15.50   |        |        |          |  |
| Q5276     | 6-subunit LAL3 subunit alpha subunit OS-Spermatophyta sp. (strain PCC 885) / Acanthaceae/Chlorophyta           | AD   | Sequence | 2619  | 155 | +      | # Protein Group | Protein Group Accession | Heublandin   | 2      | 1017  | 2      | 144155 Count | 6.2      | 129   | 14.5      | 0.11   |         |        |        |          |  |
|           |                                                                                                                |      | High     | 1     | 1   | 1      | 1               | 1                       | 1            | 0.0000 | 0.962 | 1      | 0            | 0.000750 | 25    | 102.9420  | -0.29  | 15.50   |        |        |          |  |
|           |                                                                                                                |      | Medium   | 1     | 1   | 1      | 1               | 1                       | 1            | 0.0000 | 0.908 | 1      | 0            | 0.000750 | 25    | 102.9420  | -0.29  | 15.50   |        |        |          |  |
| F7298     | S1131 protein OS-Spermatophyta sp. (strain PCC 885) / Acanthaceae/Chlorophyta                                  | AD   | Sequence | 2616  | 135 | +      | # Protein Group | Protein Group Accession | Heublandin   | 2      | 1017  | 2      | 144155 Count | 8.2      | 153   | 18.4      | 0.12   |         |        |        |          |  |
|           |                                                                                                                |      | High     | 1     | 1   | 1      | 1               | 1                       | 1            | 0.0000 | 0.964 | 1      | 0            | 0.000750 | 25    | 102.9420  | -0.29  | 15.50   |        |        |          |  |
|           |                                                                                                                |      | Medium   | 1     | 1   | 1      | 1               | 1                       | 1            | 0.0000 | 0.966 | 1      | 0            | 0.000750 | 25    | 102.9420  | -0.29  | 15.50   |        |        |          |  |
| F7214     | Palenase OS-Spermatophyta sp. (strain PCC 885) / Acanthaceae/Chlorophyta                                       | AD   | Sequence | 2524  | 145 | +      | # Protein Group | Protein Group Accession | Heublandin   | 2      | 1017  | 2      | 144155 Count | 36.4     | 283   | 31.7      | 0.15   |         |        |        |          |  |
|           |                                                                                                                |      | High     | 1     | 1   | 1      | 1               | 1                       | 1            | 0.0000 | 1.064 | 1      | 0            | 0.000750 | 25    | 102.9420  | -0.29  | 15.50   |        |        |          |  |
|           |                                                                                                                |      | Medium   | 1     | 1   | 1      | 1               | 1                       | 1            | 0.0000 | 1.087 | 1      | 0            | 0.000750 | 25    | 102.9420  | -0.29  | 15.50   |        |        |          |  |
| F7293     | DNA directed RNA polymerase subunit alpha OS-Spermatophyta sp. (strain PCC 885) / Acanthaceae/Chlorophyta      | AD   | Sequence | 2510  | 237 | +      | # Protein Group | Protein Group Accession | Heublandin   | 2      | 1017  | 2      | 144155 Count | 46.2     | 36    | 8.7       | 0.04   |         |        |        |          |  |
|           |                                                                                                                |      | High     | 1     | 1   | 1      | 1               | 1                       | 1            | 0.0000 | 1.171 | 1      | 0            | 0.000750 | 25    | 102.9420  | -0.29  | 15.50   |        |        |          |  |
|           |                                                                                                                |      | Medium   | 1     | 1   | 1      | 1               | 1                       | 1            | 0.0000 | 1.108 | 1      | 0            | 0.000750 | 25    | 102.9420  | -0.29  | 15.50   |        |        |          |  |
| F8650     | SIS ribonuclease protein-L31 OS-Spermatophyta sp. (strain PCC 885) / Acanthaceae/Chlorophyta                   | AD   | Sequence | 2430  | 261 | +      | # Protein Group | Protein Group Accession | Heublandin   | 2      | 1017  | 2      | 144155 Count | 4.8      | 65    | 10        | 0.05   |         |        |        |          |  |
|           |                                                                                                                |      | High     | 1     | 1   | 1      | 1               | 1                       | 1            | 0.0000 | 1.131 | 1      | 0            | 0.000750 | 25    | 102.9420  | -0.29  | 15.50   |        |        |          |  |
|           |                                                                                                                |      | Medium   | 1     | 1   | 1      | 1               | 1                       | 1            | 0.0000 | 1.033 | 1      | 0            | 0.000750 | 25    | 102.9420  | -0.29  | 15.50   |        |        |          |  |
| F7298     | S1130 protein OS-Spermatophyta sp. (strain PCC 885) / Acanthaceae/Chlorophyta                                  | AD   | Sequence | 2520  | 152 | +      | # Protein Group | Protein Group Accession | Heublandin   | 2      | 1017  | 2      | 144155 Count | 14.5     | 272   | 28.8      | 0.13   |         |        |        |          |  |
|           |                                                                                                                |      | High     | 1     | 1   | 1      | 1               | 1                       | 1            | 0.0000 | 1.064 | 1      | 0            | 0.000750 | 25    | 102.9420  | -0.29  | 15.50   |        |        |          |  |
|           |                                                                                                                |      | Medium   | 1     | 1   | 1      | 1               | 1                       | 1            | 0.0000 | 1.042 | 1      | 0            | 0.000750 | 25    | 102.9420  | -0.29  | 15.50   |        |        |          |  |
| F7298     | S1130 protein OS-Spermatophyta sp. (strain PCC 885) / Acanthaceae/Chlorophyta                                  | AD   | Sequence | 2520  | 152 | +      | # Protein Group | Protein Group Accession | Heublandin   | 2      | 1017  | 2      | 144155 Count | 20.0     | 342   | 33.2      | 0.16   |         |        |        |          |  |
|           |                                                                                                                |      | High     | 1     | 1   | 1      | 1               | 1                       | 1            | 0.0000 | 1.042 | 1      | 0            | 0.000750 | 25    | 102.9420  | -0.29  | 15.50   |        |        |          |  |
|           |                                                                                                                |      | Medium   | 1     | 1   | 1      | 1               | 1                       | 1            | 0.0000 | 1.048 | 1      | 0            | 0.000750 | 25    | 102.9420  | -0.29  | 15.50   |        |        |          |  |
| Q5281     | Adaptin subunit gamma OS-Spermatophyta sp. (strain PCC 885) / Acanthaceae/Chlorophyta                          | AD   | Sequence | 2250  | 139 | +      | # Protein Group | Protein Group Accession | Heublandin   | 2      | 1017  | 2      | 144155 Count | 34.3     | 452   | 47.8      | 0.23   |         |        |        |          |  |
|           |                                                                                                                |      | High     | 1     | 1   | 1      | 1               | 1                       | 1            | 0.0000 | 1.037 | 1      | 0            | 0.000750 | 25    | 102.9420  | -0.29  | 15.50   |        |        |          |  |
|           |                                                                                                                |      | Medium   | 1     | 1   | 1      | 1               | 1                       | 1            | 0.0000 | 0.973 | 1      | 0            | 0.000750 | 25    | 102.9420  | -0.29  | 15.50   |        |        |          |  |
| Q5287     | S1026 protein OS-Spermatophyta sp. (strain PCC 885) / Acanthaceae/Chlorophyta                                  | AD   | Sequence | 2244  | 136 | +      | # Protein Group | Protein Group Accession | Heublandin   | 2      | 1017  | 2      | 144155 Count | 4.2      | 217   | 24.4      | 0.10   |         |        |        |          |  |
|           |                                                                                                                |      | High     | 1     | 1   | 1      | 1               | 1                       | 1            | 0.0000 | 1.063 | 1      | 0            | 0.000750 | 25    | 102.9420  | -0.29  | 15.50   |        |        |          |  |
|           |                                                                                                                |      | Medium   | 1     | 1   | 1      | 1               | 1                       | 1            | 0.0000 | 1.067 | 1      | 0            | 0.000750 | 25    | 102.9420  | -0.29  | 15.50   |        |        |          |  |
| Q5280     | Ribe carbonylase OS-Spermatophyta sp. (strain PCC 885) / Acanthaceae/Chlorophyta                               | AD   | Sequence | 2131  | 113 | +      | # Protein Group | Protein Group Accession | Heublandin   | 2      | 1017  | 2      | 144155 Count | 14.8     | 248   | 26.1      | 0.13   |         |        |        |          |  |
|           |                                                                                                                |      | High     | 1     | 1   | 1      | 1               | 1                       | 1            | 0.0000 | 1.063 | 1      | 0            | 0.000750 | 25    | 102.9420  | -0.29  | 15.50   |        |        |          |  |
|           |                                                                                                                |      | Medium   | 1     | 1   | 1      | 1               | 1                       | 1            | 0.0000 | 0.961 | 1      | 0            | 0.000750 | 25    | 102.9420  | -0.29  | 15.50   |        |        |          |  |
| F7296     | S1131 protein OS-Spermatophyta sp. (strain PCC 885) / Acanthaceae/Chlorophyta                                  | AD   | Sequence | 2131  | 114 | +      | # Protein Group | Protein Group Accession | Heublandin   | 2      | 1017  | 2      | 144155 Count | 20.0     | 342   | 33.2      | 0.16   |         |        |        |          |  |
|           |                                                                                                                |      | High     | 1     | 1   | 1      | 1               | 1                       | 1            | 0.0000 | 1.042 | 1      | 0            | 0.000750 | 25    | 102.9420  | -0.29  | 15.50   |        |        |          |  |
|           |                                                                                                                |      | Medium   | 1     | 1   | 1      | 1               | 1                       | 1            | 0.0000 | 0.942 | 1      | 0            | 0.000750 | 25    | 102.9420  | -0.29  | 15.50   |        |        |          |  |

**Supplementary Table S5**

[NiFe]-hydrogenase is essential for cyanobacterium *Synechocystis* sp. PCC 6803 aerobic growth in the dark  
 Edith De Rosa, Vanessa Checchetto, Cinzia Franchin, Elisabetta Bergantino, Paola Berto, Ildikó Szabó, Giorgio M. Giacometti, Giorgio Arrigoni, and Paola Costantini

| Accession | Description                                                                                                                   | ZCoverage | Dark/Light Replicate 1 | Dark/Light Replicate 2 | Dark/Light Replicate 3 | Average  | p Value   |
|-----------|-------------------------------------------------------------------------------------------------------------------------------|-----------|------------------------|------------------------|------------------------|----------|-----------|
| O55542    | Srl0334 protein OS=Synchocystis sp. (strain PCC 6803 / Kazusa) GN=srl0334 PE=4 SV=1 - [Q55542_SV3]                            | 13,64     | 4,43                   | 7,59                   | 18,92                  | 10,31    | 3,88E-07  |
| O55168    | Phytochrome-like protein cph1 OS=Synchocystis sp. (strain PCC 6803 / Kazusa) GN=cph1 PE=1 SV=1 - [PHY1_SV3]                   | 4,81      | 23,48                  | 3,31                   | 1,55                   | 9,45     | 4,84E-02  |
| P77970    | Glutamate-ammonia ligase OS=Synchocystis sp. (strain PCC 6803 / Kazusa) GN=gluN PE=3 SV=1 - [P77970_SV3]                      | 9,94      | 7,05                   | 2,58                   | 1,29                   | 3,64     | 3,35E-02  |
| P73309    | 50S ribosomal protein L24 OS=Synchocystis sp. (strain PCC 6803 / Kazusa) GN=rlpX PE=3 SV=1 - [RL24_SV3]                       | 68,7      | 1,23                   | 2,52                   | 4,86                   | 2,87     | 2,23E-02  |
| P36239    | 50S ribosomal protein L19 OS=Synchocystis sp. (strain PCC 6803 / Kazusa) GN=rlpS PE=3 SV=1 - [RL19_SV3]                       | 44,26     | 3,87                   | 2,26                   | 1,77                   | 2,63     | 8,10E-05  |
| P74446    | Srl0147 protein OS=Synchocystis sp. (strain PCC 6803 / Kazusa) GN=srl0147 PE=4 SV=1 - [P74446_SV3]                            | 13,01     | 3,54                   | 2,33                   | 1,82                   | 2,56     | 3,51E-06  |
| O55541    | Srl0333 protein OS=Synchocystis sp. (strain PCC 6803 / Kazusa) GN=srl0333 PE=4 SV=1 - [Q55541_SV3]                            | 37,74     | 1,92                   | 2,29                   | 3,25                   | 2,48     | 1,05E-08  |
| P42352    | 50S ribosomal protein L9 OS=Synchocystis sp. (strain PCC 6803 / Kazusa) GN=rlpL PE=3 SV=2 - [RL9_SV3]                         | 61,18     | 1,97                   | 2,73                   | 2,39                   | 2,36     | 5,21E-19  |
| P74565    | RNA polymerase sigma factor SigA OS=Synchocystis sp. (strain PCC 6803 / Kazusa) GN=sigA PE=3 SV=1 - [SIGA_SV3]                | 8         | 3,33                   | 1,94                   | 1,71                   | 2,33     | 9,17E-05  |
| P73296    | 50S ribosomal protein L17 OS=Synchocystis sp. (strain PCC 6803 / Kazusa) GN=rlpQ PE=3 SV=1 - [RL17_SV3]                       | 52,59     | 1,73                   | 2,09                   | 3,15                   | 2,32     | 4,22E-06  |
| P73318    | 50S ribosomal protein L23 OS=Synchocystis sp. (strain PCC 6803 / Kazusa) GN=rlpW PE=3 SV=1 - [RL23_SV3]                       | 78,22     | 1,70                   | 2,17                   | 2,59                   | 2,15     | 4,46E-10  |
| P74390    | Negative aliphatic amidase regulator OS=Synchocystis sp. (strain PCC 6803 / Kazusa) GN=amic PE=4 SV=1 - [P74390_SV3]          | 41,48     | 1,27                   | 2,61                   | 2,51                   | 2,13     | 2,45E-03  |
| O55484    | Diaminopimelate decarboxylase OS=Synchocystis sp. (strain PCC 6803 / Kazusa) GN=lysA PE=3 SV=1 - [DCDA_SV3]                   | 22,39     | 2,58                   | 2,56                   | 1,25                   | 2,13     | 3,48E-03  |
| P74450    | Srl0151 protein OS=Synchocystis sp. (strain PCC 6803 / Kazusa) GN=srl0151 PE=4 SV=1 - [P74450_SV3]                            | 25,62     | 2,38                   | 2,36                   | 1,62                   | 2,12     | 5,87E-09  |
| P48957    | 50S ribosomal protein L20 OS=Synchocystis sp. (strain PCC 6803 / Kazusa) GN=rlpT PE=3 SV=1 - [RL20_SV3]                       | 57,26     | 1,58                   | 1,83                   | 2,92                   | 2,11     | 1,29E-04  |
| P73320    | 50S ribosomal protein L3 OS=Synchocystis sp. (strain PCC 6803 / Kazusa) GN=rlpC PE=3 SV=1 - [RL3_SV3]                         | 52,58     | 2,01                   | 2,46                   | 1,84                   | 2,10     | 1,58E-11  |
| P73848    | 3-hydroxyacyl-[acyl-carrier-protein] dehydratase FabZ OS=Synchocystis sp. (strain PCC 6803 / Kazusa) GN=fabZ PE=3 SV=2        | 24,39     | 1,56                   | 2,30                   | 2,37                   | 2,08     | 9,04E-08  |
| P72866    | 30S ribosomal protein S15 OS=Synchocystis sp. (strain PCC 6803 / Kazusa) GN=rsps PE=3 SV=1 - [RS15_SV3]                       | 33,71     | 2,25                   | 2,08                   | 1,78                   | 2,04     | 6,46E-25  |
| P36237    | 50S ribosomal protein L11 OS=Synchocystis sp. (strain PCC 6803 / Kazusa) GN=rlpK PE=3 SV=1 - [RL11_SV3]                       | 45,39     | 1,90                   | 2,24                   | 1,88                   | 2,00     | 5,24E-35  |
| P73306    | 50S ribosomal protein L6 OS=Synchocystis sp. (strain PCC 6803 / Kazusa) GN=rlpF PE=3 SV=1 - [RL6_SV3]                         | 77,65     | 1,75                   | 1,66                   | 2,52                   | 1,98     | 5,11E-07  |
| P73293    | 30S ribosomal protein S9 OS=Synchocystis sp. (strain PCC 6803 / Kazusa) GN=rspl PE=3 SV=1 - [RS9_SV3]                         | 37,23     | 2,82                   | 1,76                   | 1,30                   | 1,96     | 5,78E-03  |
| P73303    | 50S ribosomal protein L15 OS=Synchocystis sp. (strain PCC 6803 / Kazusa) GN=rlpO PE=3 SV=1 - [RL15_SV3]                       | 67,35     | 1,71                   | 1,92                   | 2,25                   | 1,96     | 2,76E-17  |
| P73315    | 50S ribosomal protein L22 OS=Synchocystis sp. (strain PCC 6803 / Kazusa) GN=rlpV PE=3 SV=1 - [RL22_SV3]                       | 43,8      | 1,40                   | 2,28                   | 2,16                   | 1,95     | 2,67E-05  |
| O55698    | Srl0226 protein OS=Synchocystis sp. (strain PCC 6803 / Kazusa) GN=srl0226 PE=4 SV=1 - [Q55698_SV3]                            | 2,9       | 2,94                   | 1,38                   | 1,52                   | 1,94     | 1,09E-02  |
| P73305    | 50S ribosomal protein L18 OS=Synchocystis sp. (strain PCC 6803 / Kazusa) GN=rlpR PE=3 SV=1 - [RL18_SV3]                       | 20        | 1,72                   | 1,89                   | 2,19                   | 1,93     | 8,96E-21  |
| P74448    | Srl0149 protein OS=Synchocystis sp. (strain PCC 6803 / Kazusa) GN=srl0149 PE=3 SV=1 - [P74448_SV3]                            | 20,51     | 2,29                   | 1,71                   | 1,71                   | 1,90     | 1,02E-10  |
| P73319    | 50S ribosomal protein L4 OS=Synchocystis sp. (strain PCC 6803 / Kazusa) GN=rlpD PE=3 SV=1 - [RL4_SV3]                         | 55,71     | 1,89                   | 2,10                   | 1,69                   | 1,89     | 5,09E-24  |
| P73311    | 30S ribosomal protein S17 OS=Synchocystis sp. (strain PCC 6803 / Kazusa) GN=rsps PE=3 SV=1 - [RS17_SV3]                       | 66,67     | 2,63                   | 1,59                   | 1,41                   | 1,88     | 1,91E-03  |
| P73317    | 50S ribosomal protein L2 OS=Synchocystis sp. (strain PCC 6803 / Kazusa) GN=rlpB PE=3 SV=1 - [RL2_SV3]                         | 61,59     | 1,87                   | 1,58                   | 2,15                   | 1,87     | 5,29E-12  |
| P73294    | 50S ribosomal protein L13 OS=Synchocystis sp. (strain PCC 6803 / Kazusa) GN=rlpM PE=3 SV=1 - [RL13_SV3]                       | 78,81     | 1,37                   | 1,56                   | 2,65                   | 1,86     | 3,87E-03  |
| P73307    | 30S ribosomal protein S8 OS=Synchocystis sp. (strain PCC 6803 / Kazusa) GN=rsps PE=3 SV=1 - [RS8_SV3]                         | 51,88     | 2,78                   | 1,50                   | 1,29                   | 1,86     | 1,68E-02  |
| P80505    | Glyceraldehyde-3-phosphate dehydrogenase 2 OS=Synchocystis sp. (strain PCC 6803 / Kazusa) GN=gap2 PE=3 SV=3 - [G3P]           | 64,99     | 1,98                   | 1,66                   | 2,50                   | 1,85     | 3,10E-02  |
| P73308    | 50S ribosomal protein L5 OS=Synchocystis sp. (strain PCC 6803 / Kazusa) GN=rlpE PE=3 SV=2 - [RL5_SV3]                         | 65,56     | 2,47                   | 1,66                   | 1,37                   | 1,83     | 8,35E-04  |
| O55662    | ATP-dependent Clp protease regulatory subunit OS=Synchocystis sp. (strain PCC 6803 / Kazusa) GN=clpC PE=3 SV=1 - [Q55662_SV3] | 24,36     | 2,69                   | 1,61                   | 1,12                   | 1,81     | 3,92E-02  |
| P77962    | Serine hydroxymethyltransferase OS=Synchocystis sp. (strain PCC 6803 / Kazusa) GN=ghyA PE=3 SV=1 - [GHYA_SV3]                 | 19,67     | 2,57                   | 1,61                   | 1,22                   | 1,80     | 1,26E-02  |
| P73316    | 30S ribosomal protein S19 OS=Synchocystis sp. (strain PCC 6803 / Kazusa) GN=rsps PE=3 SV=1 - [RS19_SV3]                       | 36,96     | 2,27                   | 1,69                   | 1,43                   | 1,80     | 2,65E-05  |
| P74071    | 30S ribosomal protein S2 OS=Synchocystis sp. (strain PCC 6803 / Kazusa) GN=rsps PE=3 SV=1 - [RS2_SV3]                         | 35,32     | 1,93                   | 1,77                   | 1,66                   | 1,79     | 8,38E-40  |
| P73290    | Adenylosuccinate synthetase OS=Synchocystis sp. (strain PCC 6803 / Kazusa) GN=purA PE=3 SV=2 - [PURA_SV3]                     | 12,16     | 2,67                   | 1,42                   | 1,24                   | 1,78     | 2,87E-02  |
| P74267    | 50S ribosomal protein L27 OS=Synchocystis sp. (strain PCC 6803 / Kazusa) GN=rlpZ PE=3 SV=1 - [RL27_SV3]                       | 59,77     | 1,73                   | 1,51                   | 2,06                   | 1,77     | 3,62E-10  |
| P73409    | Srl1841 protein OS=Synchocystis sp. (strain PCC 6803 / Kazusa) GN=srl1841 PE=4 SV=1 - [P73409_SV3]                            | 17,78     | 1,58                   | 1,92                   | 1,72                   | 1,74     | 7,79E-22  |
| P73304    | 30S ribosomal protein S5 OS=Synchocystis sp. (strain PCC 6803 / Kazusa) GN=rspe PE=3 SV=1 - [RS5_SV3]                         | 61,27     | 2,29                   | 1,64                   | 1,28                   | 1,74     | 2,05E-03  |
| P73636    | 30S ribosomal protein S6 OS=Synchocystis sp. (strain PCC 6803 / Kazusa) GN=rspe PE=3 SV=1 - [RS6_SV3]                         | 44,25     | 1,51                   | 1,80                   | 1,87                   | 1,73     | 9,28E-16  |
| P74193    | Threonine synthase OS=Synchocystis sp. (strain PCC 6803 / Kazusa) GN=thrC PE=3 SV=1 - [THRC_SV3]                              | 26,7      | 1,86                   | 1,59                   | 1,73                   | 2,16E-12 |           |
| P73452    | Nitrate transport protein NrtA OS=Synchocystis sp. (strain PCC 6803 / Kazusa) GN=nrtA PE=1 SV=1 - [NRTA_SV3]                  | 38,12     | 1,12                   | 1,76                   | 2,16                   | 1,68     | 1,25E-02  |
| P48946    | 30S ribosomal protein S18 OS=Synchocystis sp. (strain PCC 6803 / Kazusa) GN=rsps PE=3 SV=1 - [RS18_SV3]                       | 64,79     | 1,99                   | 1,65                   | 1,38                   | 1,68     | 1,53E-06  |
| P73298    | 30S ribosomal protein S11 OS=Synchocystis sp. (strain PCC 6803 / Kazusa) GN=rsps PE=3 SV=1 - [RS11_SV3]                       | 32,31     | 2,25                   | 1,53                   | 1,07                   | 1,62     | 4,17E-02  |
| P23350    | 50S ribosomal protein L10 OS=Synchocystis sp. (strain PCC 6803 / Kazusa) GN=rlpJ PE=3 SV=1 - [RL10_SV3]                       | 22,54     | 1,50                   | 1,50                   | 1,81                   | 1,61     | 1,68E-14  |
| P74219    | Srl1533 protein OS=Synchocystis sp. (strain PCC 6803 / Kazusa) GN=srl1533 PE=4 SV=1 - [P74219_SV3]                            | 29,57     | 1,55                   | 1,56                   | 1,66                   | 1,59     | 8,34E-102 |
| P72851    | 50S ribosomal protein L28 OS=Synchocystis sp. (strain PCC 6803 / Kazusa) GN=rlpM PE=3 SV=1 - [RL28_SV3]                       | 61,54     | 2,08                   | 1,31                   | 1,38                   | 1,58     | 3,79E-03  |
| P74395    | N utilization substance protein B homolog OS=Synchocystis sp. (strain PCC 6803 / Kazusa) GN=nusB PE=3 SV=2 - [NUSB_SV3]       | 24,89     | 1,68                   | 1,69                   | 1,31                   | 1,56     | 1,53E-07  |
| P74226    | 30S ribosomal protein S10 OS=Synchocystis sp. (strain PCC 6803 / Kazusa) GN=rsps PE=3 SV=1 - [RS10_SV3]                       | 45,71     | 1,82                   | 1,49                   | 1,33                   | 1,54     | 3,12E-06  |
| P48939    | 30S ribosomal protein S4 OS=Synchocystis sp. (strain PCC 6803 / Kazusa) GN=rsps PE=3 SV=1 - [RS4_SV3]                         | 28,22     | 2,01                   | 1,54                   | 1,03                   | 1,53     | 4,58E-02  |
| P36236    | 50S ribosomal protein L1 OS=Synchocystis sp. (strain PCC 6803 / Kazusa) GN=rlpA PE=3 SV=1 - [RL1_SV3]                         | 43,28     | 1,46                   | 1,44                   | 1,66                   | 1,52     | 1,59E-20  |
| P73289    | 50S ribosomal protein L25 OS=Synchocystis sp. (strain PCC 6803 / Kazusa) GN=rlpY PE=3 SV=2 - [RL25_SV3]                       | 65,31     | 1,04                   | 1,93                   | 1,56                   | 1,51     | 3,52E-02  |
| P73299    | 30S ribosomal protein S13 OS=Synchocystis sp. (strain PCC 6803 / Kazusa) GN=rsps PE=3 SV=1 - [RS13_SV3]                       | 54,33     | 1,15                   | 1,54                   | 1,83                   | 1,51     | 3,91E-03  |
| P48959    | 50S ribosomal protein L35 OS=Synchocystis sp. (strain PCC 6803 / Kazusa) GN=rlpM PE=3 SV=1 - [RL35_SV3]                       | 32,84     | 1,20                   | 2,02                   | 1,26                   | 1,49     | 2,43E-02  |
| P73098    | Chaperone protein dnaK3 OS=Synchocystis sp. (strain PCC 6803 / Kazusa) GN=dnaK3 PE=3 SV=2 - [DNAK3_SV3]                       | 3,24      | 1,49                   | 1,46                   | 1,48                   | 1,48     | 6,87E-221 |
| P74229    | 30S ribosomal protein S7 OS=Synchocystis sp. (strain PCC 6803 / Kazusa) GN=rsps PE=3 SV=1 - [RS7_SV3]                         | 53,85     | 1,58                   | 1,52                   | 1,31                   | 1,47     | 1,76E-11  |
| P19209    | NAD(P)H-quinone oxidoreductase subunit K1 OS=Synchocystis sp. (strain PCC 6803 / Kazusa) GN=ndhK1 PE=1 SV=1 - [NDH_K1]        | 23,79     | 0,83                   | 0,59                   | 0,59                   | 0,67     | 2,84E-04  |
| P73061    | Urease subunit alpha OS=Synchocystis sp. (strain PCC 6803 / Kazusa) GN=ureC PE=3 SV=1 - [URE1_SV3]                            | 16,34     | 0,54                   | 0,68                   | 0,80                   | 0,67     | 2,37E-04  |
| P72977    | 1,66 kDa small heat shock protein, molecular chaperon OS=Synchocystis sp. (strain PCC 6803 / Kazusa) GN=hsp17 PE=3 SV=3       | 33,56     | 0,57                   | 0,78                   | 0,67                   | 0,67     | 9,33E-03  |
| P19569    | Photosystem I reaction center subunit I OS=Synchocystis sp. (strain PCC 6803 / Kazusa) GN=psaD PE=1 SV=2 - [PSAD_SV3]         | 52,48     | 0,63                   | 0,68                   | 0,67                   | 0,66     | 0,00E+00  |
| O55360    | Sll0888 protein OS=Synchocystis sp. (strain PCC 6803 / Kazusa) GN=sll0888 PE=4 SV=1 - [Q55360_SV3]                            | 16,84     | 0,44                   | 0,62                   | 0,91                   | 0,66     | 2,59E-02  |
| P73103    | Srl1908 protein OS=Synchocystis sp. (strain PCC 6803 / Kazusa) GN=srl1908 PE=4 SV=1 - [P73103_SV3]                            | 19,12     | 0,67                   | 0,50                   | 0,78                   | 0,65     | 4,17E-04  |
| P19125    | NAD(P)H-quinone oxidoreductase subunit J OS=Synchocystis sp. (strain PCC 6803 / Kazusa) GN=ndhJ PE=1 SV=4 - [NDH_J]           | 23,46     | 0,63                   | 0,62                   | 0,64                   | 0,63     | 0,00E+00  |
| P73004    | Long-chain-fatty-acyl CoA ligase OS=Synchocystis sp. (strain PCC 6803 / Kazusa) GN=srl1609 PE=4 SV=1 - [P73004_SV3]           | 5,89      | 0,71                   | 0,55                   | 0,63                   | 0,56     | 3,29E-04  |
| P73807    | Histidinol-phosphate aminotransferase OS=Synchocystis sp. (strain PCC 6803 / Kazusa) GN=hisC PE=3 SV=2 - [HIS3_SV3]           | 27,79     | 0,39                   | 0,55                   | 0,94                   | 0,63     | 3,53E-02  |
| P73321    | Uncharacterized protein srl1894 OS=Synchocystis sp. (strain PCC 6803 / Kazusa) GN=srl1894 PE=3 SV=1 - [Y1894_SV3]             | 49,36     | 0,37                   | 0,61                   | 0,90                   | 0,63     | 3,84E-02  |
| O55410    | Sll0540 protein OS=Synchocystis sp. (strain PCC 6803 / Kazusa) GN=sll0540 PE=4 SV=1 - [Q55410_SV3]                            | 5,21      | 0,40                   | 0,70                   | 0,75                   | 0,62     | 7,09E-03  |
| O55233    | Protein DrgA OS=Synchocystis sp. (strain PCC 6803 / Kazusa) GN=drgA PE=1 SV=1 - [DRGA_SV3]                                    | 39,05     | 0,87                   | 0,46                   | 0,52                   | 0,61     | 7,02E-03  |
| P72662    | Cysteine synthase OS=Synchocystis sp. (strain PCC 6803 / Kazusa) GN=cysM PE=4 SV=1 - [P72662_SV3]                             | 24,62     | 0,84                   | 0,59                   | 0,38                   | 0,61     | 1,54E-02  |
| P74591    | Shikimate dehydrogenase OS=Synchocystis sp. (strain PCC 6803 / Kazusa) GN=aroE PE=3 SV=1 - [AROE_SV3]                         | 16,21     | 0,69                   | 0,52                   | 0,61                   | 0,61     | 2,81E-04  |
| P09190    | Cytochrome b559 subunit alpha OS=Synchocystis sp. (strain PCC 6803 / Kazusa) GN=psbE PE=1 SV=3 - [PSBE_SV3]                   | 32,1      | 0,47                   | 0,47                   | 0,73                   | 0,60     | 1,49E-02  |
| P73720    | Putative OXPP cycle protein OpcA OS=Synchocystis sp. (strain PCC 6803 / Kazusa) GN=opcA PE=4 SV=1 - [OPCA_SV3]                | 6,95      | 0,73                   | 0,61                   | 0,45                   | 0,60     | 1,85E-04  |
| O55776    | Sll0180 protein OS=Synchocystis sp. (strain PCC 6803 / Kazusa) GN=sll0180 PE=4 SV=1 - [Q55776_SV3]                            | 11,98     | 0,71                   | 0,56                   | 0,47                   | 0,58     | 2,18E-06  |
| O55199    | Phosphate-binding protein OS=Synchocystis sp. (strain PCC 6803 / Kazusa) GN=pts PE=3 SV=1 - [Q55199_SV3]                      | 31,33     | 0,35                   | 0,55                   | 0,81                   | 0,57     | 1,06E-02  |
| O55727    | Srl0645 protein OS=Synchocystis sp. (strain PCC 6803 / Kazusa) GN=srl0645 PE=4 SV=1 - [Q55727_SV3]                            | 57,77     | 0,27                   | 0,61                   | 0,83                   | 0,57     | 4,73E-02  |
| P34242    | Photosystem I iron-sulfur center OS=Synchocystis sp. (strain PCC 6803 / Kazusa) GN=psaC PE=1 SV=2 - [PSAC_SV3]                | 65,43     | 0,44                   | 0,59                   | 0,67                   | 0,57     | 4,10E-06  |
| P74416    | Glycine dehydrogenase (decarboxylating) OS=Synchocystis sp. (strain PCC 6803 / Kazusa) GN=gdh PE=1 SV=1 - [GCSP_SV3]          | 6,51      | 0,42                   | 0,66                   | 0,60                   | 0,56     | 1,70E-05  |
| O55835    | Iron uptake protein A2 OS=Synchocystis sp. (strain PCC 6803 / Kazusa) GN=futa2 PE=1 SV=1 - [FUTA2_SV3]                        | 31,5      | 0,38                   | 0,48                   | 0,88                   | 0,55     | 1,51E-02  |
| O55513    | 4-hydroxy-tetrahydrodipicolinate synthase OS=Synchocystis sp. (strain PCC 6803 / Kazusa) GN=dapA PE=3 SV=1 - [DAPA_SV3]       | 8,31      | 0,60                   | 0,47                   | 0,53                   | 1,45E-07 |           |
| P09192    | Photosystem II D2 protein OS=Synchocystis sp. (strain PCC 6803 / Kazusa) GN=psbD PE=3 SV=2 - [PSBD_SV3]                       | 10,8      | 0,75                   | 0,37                   | 0,47                   | 0,53     | 1,05E-03  |
| O55865    | Sll0585 protein OS=Synchocystis sp. (strain PCC 6803 / Kazusa) GN=sll0585 PE=4 SV=1 - [Q55865_SV3]                            | 11,11     | 0,32                   | 0,67                   | 0,59                   | 0,53     | 2,09E-03  |
| P73511    | Glycogen phosphorylase OS=Synchocystis sp. (strain PCC 6803 / Kazusa) GN=glgP PE=3 SV=1 - [PHSG_SV3]                          | 32,51     | 0,38                   | 0,43                   | 0,76                   | 0,52     | 1,08E-03  |
| P16033    | Photosystem Q(B) protein 2 OS=Synchocystis sp. (strain PCC 6803 / Kazusa) GN=psbA2 PE=1 SV=1 - [PSBA2_SV3]                    | 16,67     | 0,82                   | 0,37                   | 0,38                   | 0,52     | 5,40E-03  |
| O55517    | 6,7-dimethyl-8-ribitylmazine synthase OS=Synchocystis sp. (strain PCC 6803 / Kazusa) GN=ribH PE=3 SV=1 - [RISB_SV3]           | 29,27     | 0,37                   | 0,68                   | 0,44                   | 0,50     | 6,33E-05  |
| O55517    | Sll0529 protein OS=Synchocystis sp. (strain PCC 6803 / Kazusa) GN=sll0529 PE=4 SV=1 - [Q55517_SV3]                            | 36,25     | 0,49                   | 0,47                   | 0,51                   | 0,49     | 0,00E+00  |
| P72939    | Alkaline phosphatase OS=Synchocystis sp. (strain PCC 6803 / Kazusa) GN=sll0654 PE=4 SV=1 - [P72939_SV3]                       | 11        |                        |                        |                        |          |           |

|        |                                                                                                                         |       |      |      |      |      |          |
|--------|-------------------------------------------------------------------------------------------------------------------------|-------|------|------|------|------|----------|
| P73867 | Potassium-transporting ATPase B chain OS=Synechocystis sp. (strain PCC 6803 / Kazusa) GN=kdpB PE=3 SV=1 - [ATKB_SVNY:   | 15,36 | 0,42 | 0,10 | 0,12 | 0,21 | 8,38E-05 |
| P74625 | Phycobilisome rod-core linker polypeptide CpcG OS=Synechocystis sp. (strain PCC 6803 / Kazusa) GN=cpcG PE=4 SV=1 - [P7: | 24,1  | 0,16 | 0,16 | 0,25 | 0,19 | 0,00E+00 |

**Supplementary Table S6**

[NiFe]-hydrogenase is essential for cyanobacterium *Synechocystis* sp. PCC 6803 aerobic growth in the dark  
Edith De Rosa, Vanessa Checchetto, Cinzia Franchin, Elisabetta Bergantino, Paola Berto, Ildiko Szabo, Giorgio M. Giacometti, Giorgio Arrigoni, and Paola Costantini

| Accession | Description                                                                   | ΣCoverage | Mutant Dark/WT Dark Replicate 1 (114/116) | Mutant Dark/WT Dark Replicate 2 (115/117) | Mutant Dark/WT Dark Replicate 3 (116/114) | Average | Two-tailed Z Test |
|-----------|-------------------------------------------------------------------------------|-----------|-------------------------------------------|-------------------------------------------|-------------------------------------------|---------|-------------------|
|           | >sp CAS1_BOVIN                                                                | 17.29     |                                           | 0.2                                       |                                           | 0.1     | 0.2 1.6E-06       |
|           | >sp K1C10_HUMAN                                                               | 23.1      | 1.8                                       | 0.7                                       |                                           | 0.8     | 1.1 9.6E-01       |
|           | >sp K1C9_HUMAN                                                                | 14.29     | 1.2                                       | 1.0                                       |                                           | 1.0     | 1.1 3.3E-01       |
|           | >sp K2C1_HUMAN                                                                | 19.38     | 0.6                                       | 1.4                                       |                                           | 0.7     | 0.9 5.0E-01       |
|           | >sp K2C1_HUMAN                                                                | 34.06     | 1.2                                       | 0.7                                       |                                           | 0.8     | 0.9 5.0E-01       |
|           | >sp TRYP_PIG                                                                  | 28.57     | 1.1                                       | 1.2                                       |                                           | 1.0     | 1.0 9.0E-01       |
| P74561    | 1-(5-phosphoribosyl)-5-[5-(phosphoribosylamino)methylideneamino] imidazo      | 13.28     | 2.6                                       |                                           |                                           | 0.7     | 1.4 6.7E-01       |
| Q55603    | 1-deoxy-D-xylulose 5-phosphate reductoisomerase OS=Synechocystis sp. (s       | 8.63      | 0.7                                       |                                           |                                           | 0.9     | 0.7 1.2E-02       |
| P73067    | 1-deoxy-D-xylulose 5-phosphate synthase OS=Synechocystis sp. (strain PCC      | 5         | 0.6                                       |                                           |                                           | 0.9     | 0.7 3.5E-03       |
| P52981    | 1,4-alpha-glucan branching enzyme G1b OS=Synechocystis sp. (strain PCC        | 17.63     | 1.8                                       | 2.1                                       |                                           | 1.1     | 1.5 2.2E-02       |
| Q05971    | 10 kDa chaperonin OS=Synechocystis sp. (strain PCC 6803 / Kazusa) GN=ε        | 72.82     | 0.7                                       | 0.7                                       |                                           | 0.4     | 0.6 9.1E-03       |
| P72977    | 16.6 kDa small heat shock protein, molecular chaperon OS=Synechocystis s      | 33.56     | 2.2                                       | 2.5                                       |                                           | 2.0     | 2.1 1.1E-54       |
| P73426    | 2-C-methyl-D-erythritol 2,4-cyclodiphosphate synthase OS=Synechocystis s      | 13.04     | 2.2                                       | 1.5                                       |                                           | 1.0     | 2.1 6.4E-02       |
| P48576    | 2-isopropylmalate synthase OS=Synechocystis sp. (strain PCC 6803 / Kazu       | 4.5       | 0.7                                       |                                           |                                           | 1.0     | 0.8 2.0E+00       |
| P74507    | 2,3-bisphosphoglycerate-independent phosphoglycerate mutase OS=Synec          | 13.72     | 1.5                                       | 1.1                                       |                                           | 1.0     | 1.2 1.5E-01       |
| P73264    | 3-amino-5-hydroxybenzoic acid synthase OS=Synechocystis sp. (strain PCC       | 42.06     | 2.3                                       | 1.8                                       |                                           | 1.1     | 1.7 3.0E-02       |
| P73997    | 3-dehydroquinate synthase OS=Synechocystis sp. (strain PCC 6803 / Kazu        | 15.24     | 1.0                                       | 0.7                                       |                                           | 1.3     | 1.0 9.5E-01       |
| P73848    | 3-hydroxyacyl [acyl-carrier-protein] dehydratase Fatz2 OS=Synechocystis sp    | 24.39     | 1.0                                       | 1.0                                       |                                           | 0.7     | 0.9 2.8E-01       |
| P54384    | 3-isopropylmalate dehydratase large subunit OS=Synechocystis sp. (strain F    | 4.06      | 1.8                                       | 0.9                                       |                                           | 0.8     | 1.2 7.1E-01       |
| P74207    | 3-isopropylmalate dehydratase small subunit OS=Synechocystis sp. (strain F    | 10        | 1.0                                       | 1.1                                       |                                           | 1.3     | 1.3 2.0E+00       |
| P73960    | 3-isopropylmalate dehydrogenase OS=Synechocystis sp. (strain PCC 6803 /       | 10.77     | 1.2                                       | 1.0                                       |                                           | 1.3     | 1.4 4.1E-25       |
| Q55596    | 3-isopropylmalate reductase OS=Synechocystis sp. (strain PCC 6803 / Kazu      | 21.24     | 1.2                                       |                                           |                                           | 1.0     | 1.1 2.0E+00       |
| P73574    | 3-oxoacyl [acyl-carrier-protein] reductase 1 OS=Synechocystis sp. (strain PCC | 18.62     | 0.8                                       | 0.8                                       |                                           | 0.9     | 0.8 8.3E-02       |
| P73826    | 3-oxoacyl [acyl-carrier-protein] reductase 2 OS=Synechocystis sp. (strain PCC | 34.58     | 0.8                                       | 0.7                                       |                                           | 0.8     | 0.8 0.0E+00       |
| P73283    | 3-oxoacyl [acyl-carrier-protein] synthase 2 OS=Synechocystis sp. (strain PCC  | 5.53      | 1.2                                       | 0.8                                       |                                           | 0.8     | 0.9 5.9E-01       |
| P73530    | 30S ribosomal protein S1 homolog A OS=Synechocystis sp. (strain PCC 680       | 33.54     | 1.1                                       | 1.2                                       |                                           | 1.2     | 1.2 2.1E-20       |
| P74142    | 30S ribosomal protein S18 OS=Synechocystis sp. (strain PCC 6803 / Kazusa      | 16.72     | 1.2                                       | 0.8                                       |                                           | 0.8     | 0.6 0.6E-02       |
| P74226    | 30S ribosomal protein S10 OS=Synechocystis sp. (strain PCC 6803 / Kazusa      | 45.71     | 1.2                                       | 1.2                                       |                                           | 1.4     | 1.4 7.1E-10       |
| P73298    | 30S ribosomal protein S11 OS=Synechocystis sp. (strain PCC 6803 / Kazusa      | 32.31     | 1.4                                       | 1.3                                       |                                           | 1.7     | 1.9 5.6E-07       |
| P74230    | 30S ribosomal protein S12 OS=Synechocystis sp. (strain PCC 6803 / Kazusa      | 30.16     | 2.5                                       | 2.7                                       |                                           | 2.0     | 2.0 3.1E-25       |
| P73299    | 30S ribosomal protein S13 OS=Synechocystis sp. (strain PCC 6803 / Kazusa      | 54.33     | 1.3                                       | 0.8                                       |                                           | 0.7     | 0.8 5.0E-01       |
| P48944    | 30S ribosomal protein S14 OS=Synechocystis sp. (strain PCC 6803 / Kazusa      | 44        | 1.0                                       | 1.0                                       |                                           | 1.0     | 0.9 2.1E-01       |
| P72866    | 30S ribosomal protein S15 OS=Synechocystis sp. (strain PCC 6803 / Kazusa      | 33.71     | 1.4                                       | 1.1                                       |                                           | 1.3     | 2.4 7.0E-05       |
| P74410    | 30S ribosomal protein S16 OS=Synechocystis sp. (strain PCC 6803 / Kazusa      | 70.73     | 2.9                                       | 2.9                                       |                                           | 1.4     | 1.9 8.7E-04       |
| P73311    | 30S ribosomal protein S17 OS=Synechocystis sp. (strain PCC 6803 / Kazusa      | 66.67     | 3.3                                       | 3.3                                       |                                           | 2.0     | 2.4 4.1E-09       |
| P48946    | 30S ribosomal protein S18 OS=Synechocystis sp. (strain PCC 6803 / Kazusa      | 64.79     | 1.2                                       | 1.2                                       |                                           | 1.2     | 1.2 4.9E-03       |
| P73316    | 30S ribosomal protein S19 OS=Synechocystis sp. (strain PCC 6803 / Kazusa      | 36.96     | 1.3                                       | 1.3                                       |                                           | 1.0     | 1.2 9.8E-03       |
| P74071    | 30S ribosomal protein S2 OS=Synechocystis sp. (strain PCC 6803 / Kazusa       | 35.32     | 1.2                                       | 1.2                                       |                                           | 1.4     | 1.4 2.1E-05       |
| P73336    | 30S ribosomal protein S20 OS=Synechocystis sp. (strain PCC 6803 / Kazusa      | 16.49     | 1.3                                       | 1.3                                       |                                           | 1.7     | 1.7 3.0E-119      |
| P48949    | 30S ribosomal protein S21 OS=Synechocystis sp. (strain PCC 6803 / Kazusa      | 51.67     | 1.3                                       | 1.3                                       |                                           | 1.2     | 1.1 2.0E+00       |
| P73314    | 30S ribosomal protein S3 OS=Synechocystis sp. (strain PCC 6803 / Kazusa       | 36.67     | 1.5                                       | 1.5                                       |                                           | 1.7     | 1.5 2.6E-05       |
| P48939    | 30S ribosomal protein S4 OS=Synechocystis sp. (strain PCC 6803 / Kazusa       | 28.22     | 4.9                                       | 5.2                                       |                                           | 2.4     | 3.1 1.6E-08       |
| P73304    | 30S ribosomal protein S5 OS=Synechocystis sp. (strain PCC 6803 / Kazusa       | 61.27     | 1.5                                       | 1.6                                       |                                           | 1.7     | 1.5 2.2E-24       |
| P73636    | 30S ribosomal protein S6 OS=Synechocystis sp. (strain PCC 6803 / Kazusa       | 44.25     | 1.7                                       | 1.4                                       |                                           | 1.2     | 1.6 5.5E-04       |
| P74229    | 30S ribosomal protein S7 OS=Synechocystis sp. (strain PCC 6803 / Kazusa       | 53.85     | 1.7                                       | 1.7                                       |                                           | 1.4     | 1.6 7.5E-05       |
| P73307    | 30S ribosomal protein S8 OS=Synechocystis sp. (strain PCC 6803 / Kazusa       | 51.88     | 2.1                                       | 2.0                                       |                                           | 1.8     | 3.4 3.0E-41       |
| P73293    | 30S ribosomal protein S9 OS=Synechocystis sp. (strain PCC 6803 / Kazusa       | 37.23     | 1.4                                       | 1.3                                       |                                           | 1.4     | 1.3 1.9E-23       |
| P72785    | 4-alpha-glucanotransferase OS=Synechocystis sp. (strain PCC 6803 / Kazusa     | 8.51      | 9.0                                       | 7.5                                       |                                           | 1.9     | 4.8 1.0E-03       |
| P73672    | 4-hydroxy-3-methylthio-L-lysine diphosphate synthase OS=Synechocystis s       | 25.56     | 0.5                                       | 0.5                                       |                                           | 0.7     | 0.8 2.7E-05       |
| P72842    | 4-hydroxy-tetrahydrodipicolinate reductase OS=Synechocystis sp. (strain PCC   | 7.27      | 2.1                                       | 2.1                                       |                                           | 0.9     | 0.9 2.0E+00       |
| Q55513    | 4-hydroxy-tetrahydrodipicolinate synthase OS=Synechocystis sp. (strain PCC    | 8.31      | 3.1                                       | 3.5                                       |                                           | 2.0     | 2.0 6.7E-05       |
| P74756    | 47 kD protein OS=Synechocystis sp. (strain PCC 6803 / Kazusa) GN=slr060       | 16.71     | 1.0                                       | 1.1                                       |                                           | 1.2     | 1.1 6.3E-01       |
| P73637    | 5-oxo-1,2,5-tricarboxilic-β-penten acid decarboxylase/isomerase OS=Synec      | 14.13     | 4.2                                       | 4.2                                       |                                           | 1.6     | 2.0 4.5E-02       |
| P58236    | 50S ribosomal protein L1 OS=Synechocystis sp. (strain PCC 6803 / Kazusa       | 43.28     | 1.4                                       | 1.4                                       |                                           | 1.4     | 1.4 4.4E-00       |
| P23350    | 50S ribosomal protein L10 OS=Synechocystis sp. (strain PCC 6803 / Kazusa      | 22.54     | 1.2                                       | 1.1                                       |                                           | 1.0     | 1.1 8.9E-03       |
| P36237    | 50S ribosomal protein L11 OS=Synechocystis sp. (strain PCC 6803 / Kazusa      | 45.39     | 0.9                                       | 0.9                                       |                                           | 1.0     | 0.9 5.9E-02       |
| P73294    | 50S ribosomal protein L13 OS=Synechocystis sp. (strain PCC 6803 / Kazusa      | 78.81     | 4.4                                       | 4.1                                       |                                           | 2.8     | 4.8 2.9E-10       |
| P73310    | 50S ribosomal protein L14 OS=Synechocystis sp. (strain PCC 6803 / Kazusa      | 27.87     | 3.1                                       | 2.7                                       |                                           | 2.1     | 2.3 1.6E-02       |
| P73303    | 50S ribosomal protein L15 OS=Synechocystis sp. (strain PCC 6803 / Kazusa      | 67.35     | 3.6                                       | 6.4                                       |                                           | 2.1     | 2.6 1.6E-07       |
| P73313    | 50S ribosomal protein L16 OS=Synechocystis sp. (strain PCC 6803 / Kazusa      | 35.25     | 3.8                                       | 8.5                                       |                                           | 4.3     | 4.3 1.8E-05       |
| P73296    | 50S ribosomal protein L17 OS=Synechocystis sp. (strain PCC 6803 / Kazusa      | 52.59     | 4.8                                       | 6.7                                       |                                           | 2.3     | 3.1 3.1E-06       |
| P73305    | 50S ribosomal protein L18 OS=Synechocystis sp. (strain PCC 6803 / Kazusa      | 20        | 2.0                                       | 2.0                                       |                                           | 1.5     | 1.8 1.1E-09       |
| P38239    | 50S ribosomal protein L19 OS=Synechocystis sp. (strain PCC 6803 / Kazusa      | 44.28     | 4.1                                       | 4.1                                       |                                           | 1.8     | 3.4E-19           |
| P73317    | 50S ribosomal protein L2 OS=Synechocystis sp. (strain PCC 6803 / Kazusa)      | 61.59     | 8.8                                       | 7.9                                       |                                           | 3.7     | 5.4 7.5E-12       |
| P48957    | 50S ribosomal protein L20 OS=Synechocystis sp. (strain PCC 6803 / Kazusa      | 57.26     | 2.5                                       | 2.9                                       |                                           | 1.5     | 1.9 1.1E-04       |
| P74286    | 50S ribosomal protein L21 OS=Synechocystis sp. (strain PCC 6803 / Kazusa      | 69.35     | 5.3                                       | 5.7                                       |                                           | 2.0     | 3.4 9.0E-06       |
| P73315    | 50S ribosomal protein L22 OS=Synechocystis sp. (strain PCC 6803 / Kazusa      | 43.8      | 6.3                                       | 7.0                                       |                                           | 2.7     | 3.4 5.0E-03       |
| P73318    | 50S ribosomal protein L23 OS=Synechocystis sp. (strain PCC 6803 / Kazusa      | 78.22     | 4.2                                       | 4.2                                       |                                           | 1.8     | 2.8 4.7E-05       |
| P73309    | 50S ribosomal protein L24 OS=Synechocystis sp. (strain PCC 6803 / Kazusa      | 68.7      | 3.0                                       | 3.9                                       |                                           | 2.0     | 3.2 6.4E-08       |
| P73289    | 50S ribosomal protein L25 OS=Synechocystis sp. (strain PCC 6803 / Kazusa      | 65.31     | 7.8                                       | 8.0                                       |                                           | 2.4     | 3.9 3.8E-05       |
| P74287    | 50S ribosomal protein L27 OS=Synechocystis sp. (strain PCC 6803 / Kazusa      | 59.77     | 5.9                                       | 5.4                                       |                                           | 2.3     | 5.3 1.0E-06       |
| P72851    | 50S ribosomal protein L28 OS=Synechocystis sp. (strain PCC 6803 / Kazusa      | 61.53     | 4.1                                       | 4.0                                       |                                           | 1.9     | 3.3 1.6E-03       |
| P73312    | 50S ribosomal protein L29 OS=Synechocystis sp. (strain PCC 6803 / Kazusa      | 73.97     | 1.0                                       | 1.1                                       |                                           | 1.0     | 1.0 8.3E-01       |
| P73320    | 50S ribosomal protein L3 OS=Synechocystis sp. (strain PCC 6803 / Kazusa)      | 52.58     | 7.6                                       | 8.9                                       |                                           | 2.8     | 4.2 1.1E-06       |
| P48958    | 50S ribosomal protein L33 OS=Synechocystis sp. (strain PCC 6803 / Kazusa      | 26.15     | 2.1                                       | 2.1                                       |                                           | 2.2     | 2.3 2.0E+00       |
| P48959    | 50S ribosomal protein L34 OS=Synechocystis sp. (strain PCC 6803 / Kazusa)     | 53.73     | 3.2                                       | 3.2                                       |                                           | 2.1     | 1.5 3.1E-03       |
| P73319    | 50S ribosomal protein L4 OS=Synechocystis sp. (strain PCC 6803 / Kazusa)      | 55.71     | 5.7                                       | 7.3                                       |                                           | 2.3     | 5.8 1.6E-05       |
| P73308    | 50S ribosomal protein L5 OS=Synechocystis sp. (strain PCC 6803 / Kazusa)      | 65.56     | 2.9                                       | 3.5                                       |                                           | 1.4     | 2.5 1.2E-03       |
| P73306    | 50S ribosomal protein L6 OS=Synechocystis sp. (strain PCC 6803 / Kazusa)      | 77.65     | 5.9                                       | 5.5                                       |                                           | 3.1     | 4.7 2.0E-14       |
| P23349    | 50S ribosomal protein L7/L12 OS=Synechocystis sp. (strain PCC 6803 / Kaz      | 52.34     | 1.1                                       | 1.1                                       |                                           | 1.0     | 1.1 3.4E-01       |
| P42352    | 50S ribosomal protein L9 OS=Synechocystis sp. (strain PCC 6803 / Kazusa)      | 61.18     | 4.0                                       | 4.0                                       |                                           | 1.8     | 2.4 4.9E-01       |
| Q55798    | 6-carboxy-5,6,7,8-tetrahydropterin synthase OS=Synechocystis sp. (strain P    | 23.26     | 3.4                                       | 2.1                                       |                                           | 2.3     | 2.0 4.5E-07       |
| Q55988    | 6-phosphofructokinase 2 OS=Synechocystis sp. (strain PCC 6803 / Kazusa)       | 5.99      | 0.9                                       | 0.9                                       |                                           | 1.0     | 2.0E+00           |
| P52208    | 6-phosphogluconate dehydrogenase, decarboxylating OS=Synechocystis sp         | 24.9      | 0.6                                       | 0.6                                       |                                           | 1.1     | 0.8 9.0E-02       |
| P74618    | 6-phosphogluconate dehydrogenase OS=Synechocystis sp. (strain PCC 6803 / Kazu | 15.42     | 0.6                                       | 0.6                                       |                                           | 0.7     | 0.7 3.4E-02       |
| P73527    | 6,7-dimethyl-8-ribityllumazine synthase OS=Synechocystis sp. (strain PCC 6    | 29.27     | 2.1                                       | 1.6                                       |                                           | 1.4     | 1.4 4.8E-06       |
| Q05972    | 60 kDa chaperonin 1 OS=Synechocystis sp. (strain PCC 6803 / Kazusa) GN        | 58.96     | 0.8                                       | 0.9                                       |                                           | 0.9     | 0.8 3.6E-06       |
| P22034    | 60 kDa chaperonin 2 OS=Synechocystis sp. (strain PCC 6803 / Kazusa) GN        | 62.5      | 1.5                                       | 1.5                                       |                                           | 1.2     | 1.7 2.9E-04       |
| Q46363    | Acetazolamide conferring resistance protein zam OS=Synechocystis sp. (str     | 6.65      | 0.2                                       | 0.2                                       |                                           | 1.4     | 1.1 7.1E-01       |
| P73913    | Acetylglutamate synthase OS=Synechocystis sp. (strain PCC 6803 / Kazu         | 3.54      | 0.7                                       | 0.4                                       |                                           | 0.7     | 0.4 2.8E-02       |
| P73918    | Acetolactate synthase OS=Synechocystis sp. (strain PCC 6803 / Kazusa) Gf      | 13.09     | 1.9                                       | 1.6                                       |                                           | 1.2     | 1.6 1.2E-03       |
| Q55141    | Acetolactate synthase small subunit OS=Synechocystis sp. (strain PCC 680      | 49.42     | 0.8                                       | 0.9                                       |                                           | 0.8     | 0.9 3.6E-01       |
| P73825    | Acetyl coenzyme A acetyltransferase (Thiolase) OS=Synechocystis sp. (strai    | 7.33      | 0.6                                       | 0.6                                       |                                           | 1.0     | 0.7 2.0E+00       |
| Q55404    | Acetyl coenzyme A synthetase OS=Synechocystis sp. (strain PCC 6803 / Kaz      | 16.11     | 0.8                                       | 1.1                                       |                                           | 1.4     | 1.2 6.7E-01       |
| P73326    | Acetylglutamate kinase OS=Synechocystis sp. (strain PCC 6803 / Kazusa) C      | 8.75      | 0.5                                       | 0.5                                       |                                           | 1.1     | 1.1 2.0E+00       |
| P73313    | Acetylornithine aminotransferase OS=Synechocystis sp. (strain PCC 6803 / I    | 41.03     | 0.7                                       | 0.5                                       |                                           | 0.4     | 0.5 8.2E-04       |
| P74582    | Aconitate hydratase 2 OS=Synechocystis sp. (strain PCC 6803 / Kazusa) Gf      | 11.29     | 0.9                                       | 0.8                                       |                                           | 0.8     | 0.8 2.8E-11       |
| P20804    | Acyl carrier protein OS=Synechocystis sp. (strain PCC 6803 / Kazusa) GN=ε     | 20.78     | 1.1                                       | 1.0                                       |                                           | 0.8     | 1.0 6.0E-01       |
| Q55746    | Acyl [acyl-carrier-protein]-LTP-N-acetylglucosamine O-acetyltransferase OS=   | 9.7       | 0.7                                       | 0.7                                       |                                           | 0.7     | 0.7 2.0E+00       |
| P74008    | Adenosylhomocysteinase OS=Synechocystis sp. (strain PCC 6803 / Kazusa         | 57.65     | 0.4                                       | 0.4                                       |                                           | 0.7     | 0.5 9.1E-06       |
| P73302    | Adenylyl kinase 1 OS=Synechocystis sp. (strain PCC 6803 / Kazusa) GN=ε        | 44.32     | 1.2                                       | 1.2                                       |                                           | 1.0     | 1.2 1.1E-01       |
| P74384    | Adenylyl succinate lyase OS=Synechocystis sp. (strain PCC 6803 / Kazusa) C    | 32.02     | 2.7                                       | 1.4                                       |                                           | 1.0     | 1.6 1.5E-01       |
| P73290    | Adenylyl succinate synthase OS=Synechocystis sp. (strain PCC 6803 / Kazu      | 12.16     | 1.6                                       | 1.6                                       |                                           | 1.4     | 1.4 3.3E-03       |
| P72703    | Agmatinase 1 OS=Synechocystis sp. (strain PCC 6803 / Kazusa) GN=εp6B1         | 15.36     | 2.5                                       | 2.3                                       |                                           | 1.6     | 1.7 1.2E-08       |
| P73288    | Akylketone reductase OS=Synechocystis sp. (strain PCC 6803 / Kazusa) C        | 8.57      | 0.7                                       | 0.7                                       |                                           | 0.7     | 0.6 0.0E+00       |
| P74423    | Alanine-tRNA ligase OS=Synechocystis sp. (strain PCC 6803 / Kazusa) GN        | 4.56      | 0.6                                       | 0.6                                       |                                           | 1.8     | 1.2 9.8E-01       |
| Q55688    | Aldehyde decarboxylase OS=Synechocystis sp. (strain PCC 6803 / Kazusa)        | 12.55     | 0.9                                       | 0.9                                       |                                           | 0.9     | 0.9 2.0E+00       |
| Q55811    | Aldehyde dehydrogenase OS=Synechocystis sp. (strain                           |           |                                           |                                           |                                           |         |                   |



|        |                                                                              |       |     |     |     |             |
|--------|------------------------------------------------------------------------------|-------|-----|-----|-----|-------------|
| P74250 | Hydroperoxy fatty acid reductase gpX1 OS=Synecocystis sp. (strain PCC 68     | 16,57 | 0,6 | 0,7 | 0,6 | 3,1E-07     |
| P73824 | Hydroperoxy fatty acid reductase gpX2 OS=Synecocystis sp. (strain PCC 68     | 31,82 | 1,4 | 1,2 | 0,8 | 1,2 4,9E-01 |
| Q55552 | IMP dehydrogenase OS=Synecocystis sp. (strain PCC 6803 / Kazusa) GN=         | 20,65 | 0,5 | 0,5 | 0,4 | 0,4 0,0E+00 |
| P73853 | IMP dehydrogenase subunit OS=Synecocystis sp. (strain PCC 6803 / Kazu        | 40,31 | 3,4 | 2,9 | 1,5 | 2,4 7,2E-04 |
| Q55508 | Indole-3-glycerol phosphate synthase OS=Synecocystis sp. (strain PCC 68      | 9,49  | 1,4 | 1,2 | 1,2 | 1,7 4,7E-05 |
| P80507 | Inorganic pyrophosphatase OS=Synecocystis sp. (strain PCC 6803 / Kazusa      | 55,03 | 1,6 | 1,5 | 1,1 | 1,4 5,3E-03 |
| Q55274 | Iron stress-induced chaperone-binding protein OS=Synecocystis sp. (strain    | 2,34  | 0,3 | 0,3 | 0,4 | 0,4 2,0E+00 |
| P72827 | Iron uptake protein A1 OS=Synecocystis sp. (strain PCC 6803 / Kazusa) GI     | 39,44 | 1,9 | 1,2 | 0,9 | 1,4 3,1E-01 |
| Q55835 | Iron uptake protein A2 OS=Synecocystis sp. (strain PCC 6803 / Kazusa) GI     | 31,5  | 1,2 | 1,4 | 0,7 | 1,1 7,9E-01 |
| P80046 | Isocholate dehydrogenase [NADP] OS=Synecocystis sp. (strain PCC 6803 /       | 27,58 | 2,8 | 1,6 | 1,2 | 1,8 2,2E-02 |
| P73679 | Ispenocillin N epimerase OS=Synecocystis sp. (strain PCC 6803 / Kazusa)      | 34,91 | 1,9 | 1,9 | 0,9 | 1,6 1,0E-01 |
| P74287 | Isopterin-4-glucosylase OS=Synecocystis sp. (strain PCC 6803 / Kazusa)       | 4,58  | 0,7 | 0,5 | 1,1 | 0,9 2,0E+00 |
| P29107 | Ketol-acyl reductoisomerase OS=Synecocystis sp. (strain PCC 6803 / Kazu      | 34,74 | 0,5 | 0,6 | 0,9 | 0,7 4,3E-03 |
| P73553 | Large-conductance mechanosensitive channel OS=Synecocystis sp. (strain       | 14,48 | 1,2 | 1,8 | 1,3 | 3,9E-02     |
| P73274 | Leucine-tRNA ligase OS=Synecocystis sp. (strain PCC 6803 / Kazusa) GN        | 4,03  | 0,6 | 0,8 | 1,6 | 1,0 7,0E-01 |
| Q55987 | Light-dependent prochlorophyllide reductase OS=Synecocystis sp. (strain      | 30,12 | 0,7 | 0,8 | 1,1 | 0,9 2,5E-01 |
| P74518 | Light-stress protein A homolog OS=Synecocystis sp. (strain PCC 6803 /        | 55,5  | 1,2 | 1,2 | 1,4 | 2,0E-07     |
| Q57310 | Lipid-A-disaccharide transferase OS=Synecocystis sp. (strain PCC 6803 / Ka   | 8,63  | 0,6 | 0,6 | 0,7 | 2,0E+00     |
| Q55828 | LL-diaminopimelate aminotransferase OS=Synecocystis sp. (strain PCC 68       | 24,03 | 0,7 | 0,7 | 0,9 | 0,8 1,1E-02 |
| Q55687 | Long-chain acyl-lacyl-carrier-protein) reductase OS=Synecocystis sp. (strain | 7,08  | 1,1 | 1,0 | 1,0 | 2,0E+00     |
| P73004 | Long-chain fatty-acyl CoA ligase OS=Synecocystis sp. (strain PCC 6803 / K    | 5,89  | 0,9 | 0,9 | 1,3 | 1,1 4,9E-01 |
| P73443 | Lysine-tRNA ligase OS=Synecocystis sp. (strain PCC 6803 / Kazusa) GN=        | 4,9   | 0,9 | 0,9 | 1,0 | 2,0E+00     |
| P72772 | Magnesium-chelatase subunit ChlD OS=Synecocystis sp. (strain PCC 680:        | 3,25  | 0,8 | 0,8 | 0,8 | 2,0E+00     |
| P51634 | Magnesium-chelatase subunit ChlI OS=Synecocystis sp. (strain PCC 6803        | 15,41 | 1,1 | 1,3 | 0,9 | 1,0 6,0E-01 |
| P72584 | Magnesium-protoporphyrin IX monomethyl ester [oxidative] cyclase I OS=       | 18,99 | 0,4 | 0,4 | 0,7 | 0,5 2,5E-05 |
| Q55383 | Maize dehydrogenase OS=Synecocystis sp. (strain PCC 6803 / Kazusa) G         | 5,86  | 1,0 | 1,7 | 1,1 | 1,1 2,0E+00 |
| P73377 | Mannose-6-phosphate isomerase OS=Synecocystis sp. (strain PCC 6803 /         | 18,6  | 0,6 | 0,6 | 0,9 | 2,0E+00     |
| P74155 | Membrane protein insertase YidC OS=Synecocystis sp. (strain PCC 6803 /       | 5,21  | 0,8 | 0,9 | 0,8 | 1,1E-01     |
| P74186 | Membrane protein OS=Synecocystis sp. (strain PCC 6803 / Kazusa) GN=p         | 19,07 | 1,1 | 1,1 | 1,1 | 7,6E-02     |
| P73954 | Membrane-associated protein sir1513 OS=Synecocystis sp. (strain PCC 68       | 48,18 | 6,9 | 4,8 | 5,4 | 5,4E-09     |
| Q55729 | Methionine-tRNA ligase OS=Synecocystis sp. (strain PCC 6803 / Kazusa)        | 3,2   | 0,6 | 0,6 | 0,5 | 2,0E+00     |
| Q55444 | Methyl-accepting chemotaxis protein II OS=Synecocystis sp. (strain PCC 68    | 11,04 | 1,1 | 1,1 | 0,7 | 0,9 5,6E-01 |
| P73008 | Methyl-accepting chemotaxis protein OS=Synecocystis sp. (strain PCC 680      | 8,52  | 0,7 | 0,8 | 1,0 | 0,7 2,7E-02 |
| P72802 | Mitochondrial outer membrane F2K protein OS=Synecocystis sp. (strain PC      | 10,15 | 0,9 | 0,9 | 0,6 | 0,8 6,4E-02 |
| P74344 | Molybdenum biosynthesis MoeB protein OS=Synecocystis sp. (strain PCC         | 28,29 | 1,1 | 1,2 | 1,2 | 6,5E-01     |
| P74395 | N utilization substance protein B homolog OS=Synecocystis sp. (strain PCC    | 24,89 | 0,8 | 0,8 | 0,8 | 0,8 0,0E+00 |
| P54899 | N-acetyl-gamma-glutamyl-phosphate reductase OS=Synecocystis sp. (strai       | 14,81 | 0,6 | 0,7 | 1,2 | 0,8 2,4E-01 |
| P73736 | N-acetylmuramoyl-L-alanine amidase OS=Synecocystis sp. (strain PCC 68        | 5,86  | 0,6 | 0,6 | 0,4 | 0,6 1,1E-06 |
| Q55498 | NE-carboxyamino acid ribonucleotide mutase OS=Synecocystis sp. (st           | 17,61 | 0,7 | 0,7 | 1,1 | 0,6 2,0E+00 |
| P26522 | NAD(P)H-quinone oxidoreductase subunit 1 OS=Synecocystis sp. (strain P       | 10,75 | 1,3 | 1,5 | 1,6 | 1,7 3,4E-10 |
| P27724 | NAD(P)H-quinone oxidoreductase subunit H OS=Synecocystis sp. (strain P       | 23,1  | 1,2 | 1,5 | 1,7 | 1,5 6,8E-05 |
| P26525 | NAD(P)H-quinone oxidoreductase subunit I OS=Synecocystis sp. (strain PC      | 50,78 | 1,2 | 1,2 | 1,2 | 1,6 4,5E-06 |
| P19125 | NAD(P)H-quinone oxidoreductase subunit J OS=Synecocystis sp. (strain P       | 23,46 | 1,8 | 1,8 | 1,3 | 1,7 3,8E-05 |
| P19050 | NAD(P)H-quinone oxidoreductase subunit K I OS=Synecocystis sp. (strain       | 23,79 | 1,1 | 1,2 | 1,3 | 2,2 6,0E-02 |
| P74338 | NAD(P)H-quinone oxidoreductase subunit M OS=Synecocystis sp. (strain F       | 23,97 | 1,2 | 1,2 | 1,0 | 1,8 1,0E-02 |
| P74771 | NAD(P)H-quinone oxidoreductase subunit O OS=Synecocystis sp. (strain F       | 40,28 | 1,2 | 1,3 | 0,9 | 1,1 3,2E-01 |
| P73735 | NADH dehydrogenase OS=Synecocystis sp. (strain PCC 6803 / Kazusa) G          | 4,95  | 1,9 | 1,9 | 2,4 | 2,0E+00     |
| P72782 | NADH dehydrogenase small subunit OS=Synecocystis sp. (strain PCC 680         | 8,3   | 1,0 | 0,9 | 1,0 | 4,4E-01     |
| P54386 | NADP-specific glutamate dehydrogenase OS=Synecocystis sp. (strain PCC        | 11,21 | 1,4 | 1,8 | 3,1 | 1,6 3,9E-05 |
| P72781 | NarL subfamily OS=Synecocystis sp. (strain PCC 6803 / Kazusa) GN=sir17       | 13,48 | 0,9 | 0,7 | 0,9 | 1,0E-01     |
| P73104 | NarL subfamily OS=Synecocystis sp. (strain PCC 6803 / Kazusa) GN=sir16       | 17,84 | 1,0 | 1,0 | 0,9 | 0,9 2,5E-01 |
| P74390 | Negative aliphatic amidase regulator OS=Synecocystis sp. (strain PCC 680     | 41,48 | 1,5 | 1,3 | 1,9 | 2,8E-09     |
| P73357 | Neopulvinin oxidase OS=Synecocystis sp. (strain PCC 6803 / Kazusa) GN=n      | 1,2   | 1,2 | 1,6 | 2,3 | 2,8E-02     |
| Q55602 | NiFS protein OS=Synecocystis sp. (strain PCC 6803 / Kazusa) GN=nifS PE:      | 26,68 | 2,0 | 4,2 | 1,4 | 2,7 2,9E-03 |
| P73448 | Nitrate reductase OS=Synecocystis sp. (strain PCC 6803 / Kazusa) GN=na       | 4,76  | 1,7 | 1,5 | 1,4 | 1,4 4,8E-20 |
| P73450 | Nitrate transport ATP-binding protein NtrC OS=Synecocystis sp. (strain PC    | 2,69  | 0,5 | 0,5 | 0,7 | 2,0E+00     |
| P73452 | Nitrate transport ATP-binding protein NtrX OS=Synecocystis sp. (strain PCC   | 38,12 | 1,1 | 1,1 | 0,7 | 0,7 2,1E-02 |
| P73449 | Nitrate transport protein NtrD OS=Synecocystis sp. (strain PCC 6803 / Kazu   | 11,45 | 0,3 | 0,3 | 0,7 | 0,6 4,1E-02 |
| Q55247 | Nitrogen regulatory protein II OS=Synecocystis sp. (strain PCC 6803 / Ka     | 70,54 | 0,7 | 0,6 | 0,6 | 0,5 8,6E-08 |
| Q62EQ0 | Non-heme chloroperoxidase OS=Synecocystis sp. (strain PCC 6803 / Kazu        | 31,02 | 0,4 | 3,8 | 2,0 | 2,4 2,2E-07 |
| P73057 | Nucleoid-associated protein sir1847 OS=Synecocystis sp. (strain PCC 680:     | 23,58 | 1,4 | 1,3 | 0,8 | 1,2 4,8E-01 |
| P74404 | Nucleoside diphosphate kinase OS=Synecocystis sp. (strain PCC 6803 / K       | 34,23 | 1,6 | 2,2 | 1,1 | 1,6 3,6E-02 |
| P74571 | Oligopeptidase A OS=Synecocystis sp. (strain PCC 6803 / Kazusa) GN=prt       | 6,45  | 0,7 | 0,5 | 1,3 | 0,7 3,4E-01 |
| P74314 | OmpR subfamily OS=Synecocystis sp. (strain PCC 6803 / Kazusa) GN=sirt        | 18,8  | 0,9 | 1,0 | 0,9 | 1,0 2,0E+00 |
| P74102 | Orange carotenoid-binding protein OS=Synecocystis sp. (strain PCC 6803 /     | 51,74 | 0,7 | 1,1 | 1,3 | 1,0 9,5E-01 |
| Q55497 | Omitidease OS=Synecocystis sp. (strain PCC 6803 / Kazusa) GN=omit            | 8,17  | 1,0 | 1,0 | 1,5 | 0,1 1,7E-01 |
| P72848 | Oxygen-dependent coproporphyrinogen-III oxidase OS=Synecocystis sp. (s       | 40,88 | 1,2 | 0,9 | 0,6 | 0,9 4,7E-01 |
| P74707 | Peptide chain release factor 1 OS=Synecocystis sp. (strain PCC 6803 / Kaz    | 8,22  | 0,6 | 0,6 | 0,6 | 0,6 0,0E+00 |
| P72622 | Peptide methionine sulfide reductase MsrA1 OS=Synecocystis sp. (strain       | 9,46  | 1,9 | 1,2 | 2,9 | 7,8E-02     |
| P73037 | Peptidyl-prolyl cis-trans isomerase OS=Synecocystis sp. (strain PCC 6803 /   | 17,91 | 1,1 | 0,9 | 0,8 | 0,9 5,5E-01 |
| P73789 | Peptidyl-prolyl cis-trans isomerase sir1251 OS=Synecocystis sp. (strain PC   | 8,17  | 0,7 | 0,8 | 0,8 | 0,9 3,2E-02 |
| Q55387 | Periplasmic binding protein of ABC transporter for natural amino acids OS=S  | 19,38 | 1,0 | 0,8 | 0,8 | 0,9 5,8E-01 |
| Q55187 | Phenylalanine-tRNA ligase alpha subunit OS=Synecocystis sp. (strain PCC      | 13,29 | 0,8 | 0,7 | 1,2 | 0,9 4,0E-01 |
| P74296 | Phenylalanine-tRNA ligase beta subunit OS=Synecocystis sp. (strain PCC       | 8,4   | 0,7 | 0,9 | 1,1 | 0,9 2,6E-01 |
| Q55196 | Phosphatase OS=Synecocystis sp. (strain PCC 6803 / Kazusa) GN=pho            | 25,65 | 0,1 | 0,6 | 0,4 | 0,6 2,0E+00 |
| Q55198 | Phosphate transport system permease protein PstC OS=Synecocystis sp. (       | 5,05  | 0,4 | 0,3 | 0,4 | 0,3 7,3E-15 |
| P73785 | Phosphate-binding protein OS=Synecocystis sp. (strain PCC 6803 / Kazusa)     | 54,35 | 0,1 | 0,1 | 0,1 | 0,2 5,4E-09 |
| Q55199 | Phosphate-binding protein OS=Synecocystis sp. (strain PCC 6803 / Kazusa)     | 31,33 | 0,7 | 0,5 | 0,8 | 0,7 9,6E-04 |
| P74299 | Phosphoenolpyruvate carboxylase OS=Synecocystis sp. (strain PCC 6803 /       | 9,96  | 0,9 | 1,2 | 1,1 | 1,1 5,4E-01 |
| Q55905 | Phosphoenolpyruvate synthase OS=Synecocystis sp. (strain PCC 6803 / Ka       | 3,42  | 0,6 | 0,8 | 0,8 | 2,0E+00     |
| P74643 | Phosphoglucomutase OS=Synecocystis sp. (strain PCC 6803 / Kazusa) GP         | 9,52  | 0,8 | 0,9 | 0,7 | 0,8 6,3E-04 |
| P74421 | Phosphoglycerate kinase OS=Synecocystis sp. (strain PCC 6803 / Kazusa)       | 40,65 | 0,6 | 0,6 | 0,7 | 0,8 1,4E-08 |
| Q55894 | Phosphohomocystidyltransferase OS=Synecocystis sp. (strain PCC 6803 /        | 12,85 | 1,2 | 1,8 | 0,8 | 0,9 5,2E-01 |
| P74282 | Phosphotransferase OS=Synecocystis sp. (strain PCC 6803 / Kazusa) GN=        | 4,3   | 0,3 | 0,3 | 0,3 | 0,3 1,4E-02 |
| P73471 | Phosphoribosylaminoimidazole-succinocarboxamide synthase OS=Syneco           | 9,47  | 1,8 | 1,5 | 1,6 | 1,8 2,7E-20 |
| Q55843 | Phosphoribosylformylglycinamide synthase 1 OS=Synecocystis sp. (strain       | 15,18 | 0,7 | 0,7 | 1,0 | 1,0 2,0E+00 |
| P72644 | Phosphoribosylformylglycinamide synthase 2 OS=Synecocystis sp. (strain       | 4,3   | 1,0 | 1,0 | 1,0 | 2,0E+00     |
| P37101 | Phosphoribulokinase OS=Synecocystis sp. (strain PCC 6803 / Kazusa) GN        | 43,98 | 0,9 | 1,2 | 1,0 | 1,0 9,2E-01 |
| P73546 | Phosphorylase OS=Synecocystis sp. (strain PCC 6803 / Kazusa) GN=pgp          | 12,16 | 0,3 | 0,5 | 0,7 | 0,7 3,2E-02 |
| P74063 | Photosystem I assembly protein YcF3 OS=Synecocystis sp. (strain PCC 68       | 14,45 | 0,3 | 0,4 | 0,4 | 2,0E+00     |
| P72705 | Photosystem I assembly protein YcF4 OS=Synecocystis sp. (strain PCC 68       | 10,64 | 1,1 | 1,1 | 1,2 | 2,0E+00     |
| P72966 | Photosystem I biogenesis protein BtpA OS=Synecocystis sp. (strain PCC 68     | 16,38 | 0,9 | 0,9 | 0,8 | 2,0E+00     |
| P32422 | Photosystem I iron-sulfur center OS=Synecocystis sp. (strain PCC 6803 / K    | 65,43 | 1,1 | 1,0 | 1,4 | 1,2 9,9E-02 |
| P29254 | Photosystem I P700 chlorophyll a apoprotein A1 OS=Synecocystis sp. (stra     | 13,72 | 0,7 | 1,0 | 1,9 | 1,1 7,9E-01 |
| P29255 | Photosystem I P700 chlorophyll a apoprotein A2 OS=Synecocystis sp. (stra     | 17,65 | 0,7 | 1,0 | 2,3 | 1,3 7,0E-01 |
| P19569 | Photosystem I reaction center subunit II OS=Synecocystis sp. (strain PCC     | 52,48 | 0,8 | 1,1 | 1,1 | 0,9 3,6E-01 |
| P29256 | Photosystem I reaction center subunit III OS=Synecocystis sp. (strain PCC    | 50,36 | 1,0 | 0,9 | 1,1 | 1,0 8,7E-01 |
| P12975 | Photosystem I reaction center subunit IV OS=Synecocystis sp. (strain PCC     | 41,69 | 0,1 | 0,2 | 0,5 | 0,3 5,9E-04 |
| P37277 | Photosystem I reaction center subunit XI OS=Synecocystis sp. (strain PCC     | 26,11 | 0,9 | 0,9 | 1,3 | 1,1 8,0E-01 |
| Q55332 | Photosystem II 12 kDa extrinsic protein OS=Synecocystis sp. (strain PCC 6    | 25,19 | 0,6 | 0,9 | 1,1 | 0,7 2,0E+00 |
| P09193 | Photosystem II 44 kDa reaction center protein OS=Synecocystis sp. (strain    | 17,17 | 1,0 | 1,0 | 1,8 | 1,2 3,0E-01 |
| P05429 | Photosystem II CP47 apoprotein OS=Synecocystis sp. (strain PCC 6803 /        | 22,09 | 0,6 | 1,1 | 1,5 | 1,4E-02     |
| P09192 | Photosystem II D2 protein OS=Synecocystis sp. (strain PCC 6803 / Kazusa)     | 10,8  | 1,2 | 1,2 | 2,0 | 1,5 1,7E-01 |
| P74367 | Photosystem II lipoprotein PabZ7 OS=Synecocystis sp. (strain PCC 6803 /      | 35,82 | 0,7 | 0,6 | 0,7 | 0,7 2,7E-04 |
| P10549 | Photosystem II manganese-stabilizing polypeptide OS=Synecocystis sp. (st     | 27,01 | 0,3 | 0,2 | 0,2 | 0,3 7,5E-11 |
| Q55354 | Photosystem II reaction center protein L OS=Synecocystis sp. (strain PCC /   | 33,33 | 1,0 | 1,0 | 1,0 | 1,0 2,0E+00 |
| Q55353 | Photosystem II reaction center protein P OS=Synecocystis sp. (strain PCC /   | 15,93 | 0,5 | 0,5 | 0,5 | 0,5 2,0E+00 |
| P16033 | Photosystem Q(B) protein 2 OS=Synecocystis sp. (strain PCC 6803 / Kazu       | 16,67 | 1,1 | 1,1 | 1,9 | 1,4 1,1E-01 |
| Q55544 | Phycobiliprotein ApCε OS=Synecocystis sp. (strain PCC 6803 / Kazusa) GI      | 48,21 | 0,5 | 0,7 | 1,4 | 0,9 3,8E-01 |
| P73203 | Phycobilisome 32.1 kDa linker polypeptide, phycocyanin-associated, rod 1 O   | 66,32 | 0,8 | 1,1 | 1,3 | 1,0 8,3E-01 |
| P73204 | Phycobilisome 32.1 kDa linker polypeptide, phycocyanin-associated, rod 2 O   | 58,97 | 1,1 | 1,5 | 1,2 | 1,6 6,0E-01 |
| Q01950 | Phycobilisome 7.8 kDa linker polypeptide, allophycocyanin-associated, core   | 50,75 | 0,4 | 0,5 | 1,0 | 0,6 5,9E-02 |
| P73202 | Phycobilisome 8.9 kDa linker polypeptide, phycocyanin-associated, rod OS=    | 81,93 | 0,2 | 0,2 | 0,2 | 0,2 0,0E+00 |
| P73093 | Phycobilisome rod-core linker polypeptide CpcG OS=Synecocystis sp. (stra     | 59,57 | 0,6 | 1,0 | 0,7 | 0,7 6,9E-02 |
| P74625 | Phycobilisome rod-core linker polypeptide CpcG OS=Synecocystis sp. (stra     | 24,1  | 2,6 | 1,2 | 1,5 | 1,6 2,5E-02 |
| Q55891 | Phycocyanobilin ferredoxin oxidoreductase OS=Synecocystis sp. (strain PC     | 8,06  | 0,9 | 0,9 | 0,9 | 0,9 2,0E+00 |
| Q55168 | Phytochrome-like protein cph1 OS=Synecocystis sp. (strain PCC 6803 / Ka      | 4,81  | 0,4 | 0,4 | 0,9 | 0,6 1,0E-02 |
| P73173 | PIII protein OS=Synecocystis sp. (strain PCC 6803 / Kazusa) GN=piII PE=      | 9,55  | 1,3 | 1,0 | 1,0 | 0,9 7,8E-01 |
| P21697 | Plastocyanin OS=Synecocystis sp. (strain PCC 6803 / Kazusa) GN=petE P        | 44,44 | 1,5 | 1,5 | 0,9 | 1,3 1,6E-01 |
| P73390 | Poly(3-hydroxyalkanoate) synthase OS=Synecocystis sp. (strain PCC 6803       | 7,14  | 0,5 | 0,7 | 1,1 | 0,7 4,2E-01 |
| Q55898 | Polyposphatase OS=Synecocystis sp. (strain PCC 6803 / Kazusa) GI             | 9,07  | 1,1 | 1,1 | 0,8 | 0,9 6,3E-01 |
| P72659 | Polyribonucleotide nucleoidyltransferase OS=Synecocystis sp. (strain PCC     | 21,73 | 0,8 | 0,9 | 1,3 | 1,0 9,9E-01 |
| P73660 | Porphobilinogen deaminase OS=Synecocystis sp. (strain PCC 6803 / Kazu        | 13,44 | 1,1 | 1,0 | 0,8 | 1,0 7,8E-01 |
| P73866 | Potassium-transporting ATPase A chain OS=Synecocystis sp. (strain PCC /      | 4,84  | 0,6 | 0,6 | 0,6 | 0,6 2,9E-08 |
| P73867 | Potassium-transporting ATPase B chain OS=Synecocystis sp. (strain PCC /      | 15,36 | 0,5 | 0,3 | 0,7 | 0,6 2,4E-02 |
| P73547 | Precorrin decarboxylase OS=Synecocystis sp. (strain PCC 6803 / Kazusa)       | 11,01 | 0,8 | 0,8 | 0,6 | 2,0E+00     |
| P73849 | Probable 2-phosphosulfolactate phosphatase OS=Synecocystis sp. (strain I     | 9,54  | 1,1 | 1,1 | 1,5 | 2,0E+00     |
| Q55385 | Probable 30S ribosomal protein P5RP-3 OS=Synecocystis sp. (strain PCC        | 65,18 | 0,7 | 0,9 | 0,9 | 0,7 2,1E-02 |
| P72940 | Probable acyl-sulfate kinase OS=Synecocystis sp. (strain PCC 6803 / Kazusa)  | 21,6  | 1,1 | 1,1 | 1,5 | 1,4E-02     |
| P73270 | Probable agmatinase 2 OS=Synecocystis sp. (strain PCC 6803 / Kazusa) C       |       |     |     |     |             |



|        |                                                                               |       |     |     |     |  |  |  |     |     |         |
|--------|-------------------------------------------------------------------------------|-------|-----|-----|-----|--|--|--|-----|-----|---------|
| Q55709 | Protein translocase subunit SecA OS=Synecocystis sp. (strain PCC 6803 /       | 11,16 |     |     |     |  |  |  | 1,0 | 0,9 | 5,6E-01 |
| P38382 | Protein translocase subunit SecE OS=Synecocystis sp. (strain PCC 6803 /       | 23,46 | 0,5 | 1,1 | 0,7 |  |  |  | 0,9 | 1,3 | 2,0E+00 |
| P77954 | Protein translocase subunit SecY OS=Synecocystis sp. (strain PCC 6803 /       | 6,11  |     |     |     |  |  |  | 1,4 | 0,9 | 7,0E-01 |
| P74466 | Putative ATP-dependent Clp protease proteolytic subunit-like OS=Synecoc       | 20    |     |     |     |  |  |  | 0,7 | 0,8 | 0,0E+00 |
| P72841 | Putative biopolymer transport protein ExxB-like 2 OS=Synecocystis sp. (str    | 10,57 |     |     |     |  |  |  | 0,9 | 0,7 | 4,1E-03 |
| P73163 | Putative carbonylmethylenerubritolidease OS=Synecocystis sp. (strain PCC /    | 34,55 |     |     |     |  |  |  | 1,5 | 1,5 | 0,0E+00 |
| P74220 | Putative carboxymethyltransferase OS=Synecocystis sp. (strain PCC 6803 /      | 13,62 |     |     |     |  |  |  | 3,9 | 2,8 | 0,0E+00 |
| P74373 | Putative diflavon flavoprotein A 3 OS=Synecocystis sp. (strain PCC 6803 / K   | 5,19  |     |     |     |  |  |  | 1,0 | 1,1 | 2,0E+00 |
| Q55445 | Putative methyl-accepting chemotaxis protein sll0041 OS=Synecocystis sp.      | 6,2   |     |     |     |  |  |  | 1,8 | 1,2 | 5,9E-01 |
| P73720 | Putative OxpP cycle protein OpcA OS=Synecocystis sp. (strain PCC 6803 /       | 6,95  |     |     |     |  |  |  | 1,4 | 1,7 | 4,0E-03 |
| P73728 | Putative peroxidodisulfite reductase OS=Synecocystis sp. (strain PCC 6803 / K | 60,32 |     |     |     |  |  |  | 1,7 | 1,3 | 5,6E-02 |
| P73790 | Putative perin-4-alpharibitolamine dehydratase OS=Synecocystis sp. (s         | 34,38 |     |     |     |  |  |  | 1,0 | 1,4 | 2,0E+00 |
| P73623 | Putative quercetin 2,3-dioxygenase sll1773 OS=Synecocystis sp. (strain PC     | 11,21 |     |     |     |  |  |  | 1,9 | 2,1 | 2,0E+00 |
| P74060 | Putative sulfur carrier protein sll0821 OS=Synecocystis sp. (strain PCC 68C   | 20,18 |     |     |     |  |  |  | 1,1 | 1,6 | 4,8E-27 |
| Q55118 | Putative thylakoid lumen peptidyl-prolyl cis-trans isomerase sll0408 OS=Syn   | 19    |     |     |     |  |  |  | 1,0 | 0,7 | 4,9E-01 |
| P72776 | Pyridoxine 5-phosphate synthase OS=Synecocystis sp. (strain PCC 6803 /        | 49,17 |     |     |     |  |  |  | 1,6 | 1,0 | 3,3E-02 |
| P74211 | Pyridoxine 5-phosphate synthase OS=Synecocystis sp. (strain PCC 6803 /        | 18,22 |     |     |     |  |  |  | 1,2 | 1,6 | 8,1E-01 |
| P74572 | Pyruvate-5-carboxylate reductase OS=Synecocystis sp. (strain PCC 6803 /       | 8,61  |     |     |     |  |  |  | 1,2 | 1,3 | 2,0E+00 |
| P73405 | Pyruvate dehydrogenase E1 beta subunit OS=Synecocystis sp. (strain PCC        | 17,9  |     |     |     |  |  |  | 1,2 | 0,9 | 5,5E-01 |
| P74490 | Pyruvate dehydrogenase E1 component, alpha subunit OS=Synecocystis s          | 19,88 |     |     |     |  |  |  | 1,2 | 1,3 | 8,3E-04 |
| Q55863 | Pyruvate kinase 1 OS=Synecocystis sp. (strain PCC 6803 / Kazusa) GN=          | 5,59  |     |     |     |  |  |  | 0,8 | 0,8 | 2,0E+00 |
| P73534 | Pyruvate kinase 2 OS=Synecocystis sp. (strain PCC 6803 / Kazusa) GN=          | 13,03 |     |     |     |  |  |  | 1,2 | 1,0 | 1,7E-01 |
| P73348 | Rehydrin OS=Synecocystis sp. (strain PCC 6803 / Kazusa) GN=sll198 PE          | 48,82 |     |     |     |  |  |  | 0,7 | 0,9 | 2,6E-01 |
| P74124 | Renin-binding protein OS=Synecocystis sp. (strain PCC 6803 / Kazusa) GN       | 5,37  |     |     |     |  |  |  | 1,5 | 2,1 | 2,0E+00 |
| Q55641 | Ribonucleoside Diphosphate Kinase OS=Synecocystis sp. (strain PCC 6803 /      | 13,36 |     |     |     |  |  |  | 1,2 | 1,1 | 2,7E-02 |
| P72656 | Ribonuclease E/C-like OS=Synecocystis sp. (strain PCC 6803 / Kaz              | 11,28 |     |     |     |  |  |  | 1,0 | 1,2 | 1,1E-01 |
| P54123 | Ribonuclease J OS=Synecocystis sp. (strain PCC 6803 / Kazusa) GN=sll0t        | 13,91 |     |     |     |  |  |  | 0,9 | 1,5 | 9,8E-01 |
| Q55766 | Ribose-5-phosphate isomerase A OS=Synecocystis sp. (strain PCC 6803 /         | 16,6  |     |     |     |  |  |  | 0,9 | 0,9 | 2,0E+00 |
| Q55848 | Ribose-phosphate pyrophosphokinase OS=Synecocystis sp. (strain PCC 6i         | 11,71 |     |     |     |  |  |  | 0,8 | 0,8 | 0,0E+00 |
| P73886 | Ribosome-binding ATPase YnfH OS=Synecocystis sp. (strain PCC 6803 /           | 19,63 |     |     |     |  |  |  | 1,1 | 1,0 | 7,5E-01 |
| Q55625 | Ribosome-binding factor A OS=Synecocystis sp. (strain PCC 6803 / Kazus        | 30,38 |     |     |     |  |  |  | 1,5 | 1,8 | 1,3E-02 |
| P74456 | Ribosome-recycling factor OS=Synecocystis sp. (strain PCC 6803 / Kazusa       | 36,26 |     |     |     |  |  |  | 1,1 | 1,2 | 5,2E-01 |
| P54205 | Ribulose biphosphate carboxylase large chain OS=Synecocystis sp. (strai       | 49,15 |     |     |     |  |  |  | 1,1 | 1,7 | 2,3E-01 |
| P54206 | Ribulose biphosphate carboxylase small chain OS=Synecocystis sp. (strai       | 61,95 |     |     |     |  |  |  | 1,0 | 0,9 | 3,6E-01 |
| P74061 | Ribulose-5-phosphate 3-epimerase OS=Synecocystis sp. (strain PCC 6803 /       | 43,04 |     |     |     |  |  |  | 1,0 | 1,0 | 7,2E-01 |
| P74565 | RNA polymerase sigma factor SigA OS=Synecocystis sp. (strain PCC 6803         | 8     |     |     |     |  |  |  | 0,9 | 0,7 | 0,8E-01 |
| P73557 | RNA-binding protein OS=Synecocystis sp. (strain PCC 6803 / Kazusa) GN=        | 14,46 |     |     |     |  |  |  | 0,8 | 0,8 | 1,1E-03 |
| P73862 | Rubisco operon transcriptional regulator OS=Synecocystis sp. (strain PCC      | 14,24 |     |     |     |  |  |  | 1,4 | 1,0 | 7,7E-01 |
| P73068 | Rubredoxin OS=Synecocystis sp. (strain PCC 6803 / Kazusa) GN=rub PE           | 20,87 |     |     |     |  |  |  | 0,7 | 0,8 | 2,0E+00 |
| P72871 | S-adenosylmethionine synthase OS=Synecocystis sp. (strain PCC 6803 / K        | 38,5  |     |     |     |  |  |  | 1,2 | 0,9 | 3,3E-01 |
| PODJF8 | S-methyl-5-thioadenosine phosphorylase OS=Synecocystis sp. (strain PCC        | 30,98 |     |     |     |  |  |  | 1,5 | 2,2 | 6,9E-06 |
| P73010 | Sec-independent protein translocase protein TatA OS=Synecocystis sp. (str     | 17,46 |     |     |     |  |  |  | 0,4 | 0,4 | 2,0E+00 |
| Q55758 | Sensory transduction histidine kinase OS=Synecocystis sp. (strain PCC 68i     | 21,59 |     |     |     |  |  |  | 0,8 | 0,9 | 3,1E-02 |
| Q55117 | Sensory transduction histidine kinase OS=Synecocystis sp. (strain PCC 68i     | 3,68  |     |     |     |  |  |  | 1,0 | 1,0 | 2,0E+00 |
| Q55900 | Septum site-determining protein MinD OS=Synecocystis sp. (strain PCC 68       | 25,94 |     |     |     |  |  |  | 1,1 | 1,0 | 4,6E-01 |
| P77962 | Serine hydroxymethyltransferase OS=Synecocystis sp. (strain PCC 6803 /        | 19,67 |     |     |     |  |  |  | 0,6 | 0,7 | 3,1E-11 |
| P73201 | Serine-rRNA ligase OS=Synecocystis sp. (strain PCC 6803 / Kazusa) GN=         | 7,91  |     |     |     |  |  |  | 1,3 | 1,1 | 4,4E-01 |
| P74591 | Shikimate dehydrogenase OS=Synecocystis sp. (strain PCC 6803 / Kazusa)        | 16,21 |     |     |     |  |  |  | 2,1 | 1,6 | 2,0E+00 |
| P73991 | Short-chain alcohol dehydrogenase family OS=Synecocystis sp. (strain PC       | 6,02  |     |     |     |  |  |  | 0,6 | 0,8 | 2,0E+00 |
| P74214 | Signal recognition particle protein OS=Synecocystis sp. (strain PCC 6803 /    | 4,56  |     |     |     |  |  |  | 2,3 | 2,1 | 2,0E+00 |
| P73930 | Signal recognition particle receptor FtsY OS=Synecocystis sp. (strain PCC     | 3,37  |     |     |     |  |  |  | 1,3 | 1,1 | 2,0E+00 |
| Q55499 | Single-stranded DNA-binding protein 1 OS=Synecocystis sp. (strain PCC 6       | 69,42 |     | 1,9 | 2,2 |  |  |  | 1,5 | 1,6 | 6,1E-09 |
| Q55658 | Sll0023 protein OS=Synecocystis sp. (strain PCC 6803 / Kazusa) GN=sll0        | 5,37  |     |     |     |  |  |  | 1,2 | 1,0 | 5,3E-02 |
| Q55162 | Sll0051 protein OS=Synecocystis sp. (strain PCC 6803 / Kazusa) GN=sll0        | 11,32 |     |     |     |  |  |  | 2,8 | 1,0 | 1,4E-01 |
| Q55140 | Sll0066 protein OS=Synecocystis sp. (strain PCC 6803 / Kazusa) GN=sll0        | 2,54  |     |     |     |  |  |  | 1,1 | 1,0 | 2,0E+00 |
| Q55138 | Sll0068 protein OS=Synecocystis sp. (strain PCC 6803 / Kazusa) GN=sll0        | 1,53  |     |     |     |  |  |  | 1,7 | 2,1 | 2,0E+00 |
| Q55134 | Sll0101 protein OS=Synecocystis sp. (strain PCC 6803 / Kazusa) GN=sll0        | 6,3   | 0,4 |     |     |  |  |  | 1,1 | 1,0 | 2,0E+00 |
| P74453 | Sll0148 protein OS=Synecocystis sp. (strain PCC 6803 / Kazusa) GN=sll01       | 3,67  |     |     |     |  |  |  | 1,2 | 0,9 | 5,1E-01 |
| Q55564 | Sll0162 protein OS=Synecocystis sp. (strain PCC 6803 / Kazusa) GN=sll01       | 10,31 |     |     |     |  |  |  | 0,6 | 0,6 | 2,0E+00 |
| Q55558 | Sll0172 protein OS=Synecocystis sp. (strain PCC 6803 / Kazusa) GN=sll01       | 21,05 |     |     |     |  |  |  | 0,5 | 0,6 | 1,4E-04 |
| Q55776 | Sll0180 protein OS=Synecocystis sp. (strain PCC 6803 / Kazusa) GN=sll01       | 11,98 |     |     |     |  |  |  | 1,3 | 3,9 | 5,4E-14 |
| Q55770 | Sll0185 protein OS=Synecocystis sp. (strain PCC 6803 / Kazusa) GN=sll01       | 9,79  |     |     |     |  |  |  | 0,8 | 0,8 | 2,0E+00 |
| Q55762 | Sll0188 protein OS=Synecocystis sp. (strain PCC 6803 / Kazusa) GN=sll01       | 9,38  |     |     |     |  |  |  | 1,0 | 0,9 | 2,0E+00 |
| P72707 | Sll0224 protein OS=Synecocystis sp. (strain PCC 6803 / Kazusa) GN=sll02       | 17,45 |     |     |     |  |  |  | 1,5 | 1,0 | 8,8E-01 |
| P73902 | Sll0236 protein OS=Synecocystis sp. (strain PCC 6803 / Kazusa) GN=sll02       | 22,58 |     |     |     |  |  |  | 3,3 | 2,0 | 2,6E-11 |
| P74394 | Sll0272 protein OS=Synecocystis sp. (strain PCC 6803 / Kazusa) GN=sll02       | 35,67 |     |     |     |  |  |  | 1,2 | 1,1 | 1,1E-01 |
| Q55648 | Sll0314 protein OS=Synecocystis sp. (strain PCC 6803 / Kazusa) GN=sll03       | 32,8  |     |     |     |  |  |  | 2,8 | 1,0 | 1,1E-01 |
| P74426 | Sll0359 protein OS=Synecocystis sp. (strain PCC 6803 / Kazusa) GN=sll03       | 42,58 |     |     |     |  |  |  | 0,6 | 0,7 | 0,0E+00 |
| Q55734 | Sll0395 protein OS=Synecocystis sp. (strain PCC 6803 / Kazusa) GN=sll03       | 32,08 |     |     |     |  |  |  | 1,7 | 1,2 | 2,8E-06 |
| P74685 | Sll0468 protein OS=Synecocystis sp. (strain PCC 6803 / Kazusa) GN=sll04       | 13,01 |     |     |     |  |  |  | 1,4 | 3,0 | 1,5E-01 |
| Q55104 | Sll0456 protein OS=Synecocystis sp. (strain PCC 6803 / Kazusa) GN=sll04       | 5,41  |     |     |     |  |  |  | 1,1 | 1,0 | 2,0E+00 |
| Q55847 | Sll0470 protein OS=Synecocystis sp. (strain PCC 6803 / Kazusa) GN=sll04       | 19,35 |     |     |     |  |  |  | 1,0 | 0,7 | 6,2E-02 |
| Q55496 | Sll0493 protein OS=Synecocystis sp. (strain PCC 6803 / Kazusa) GN=sll04       | 8,33  |     |     |     |  |  |  | 1,3 | 1,0 | 9,1E-01 |
| Q55492 | Sll0497 protein OS=Synecocystis sp. (strain PCC 6803 / Kazusa) GN=sll04       | 8     |     |     |     |  |  |  | 1,6 | 1,6 | 2,0E+00 |
| Q55466 | Sll0518 protein OS=Synecocystis sp. (strain PCC 6803 / Kazusa) GN=sll05       | 16,35 | 0,7 |     |     |  |  |  | 0,8 | 0,8 | 2,8E-01 |
| Q55517 | Sll0529 protein OS=Synecocystis sp. (strain PCC 6803 / Kazusa) GN=sll05       | 36,25 |     |     |     |  |  |  | 1,0 | 1,2 | 2,4E-02 |
| Q55410 | Sll0540 protein OS=Synecocystis sp. (strain PCC 6803 / Kazusa) GN=sll05       | 5,21  |     |     |     |  |  |  | 0,5 | 0,7 | 1,2E-02 |
| Q55390 | Sll0553 protein OS=Synecocystis sp. (strain PCC 6803 / Kazusa) GN=sll05       | 25,51 |     |     |     |  |  |  | 1,8 | 2,6 | 1,7E-02 |
| Q55685 | Sll0585 protein OS=Synecocystis sp. (strain PCC 6803 / Kazusa) GN=sll05       | 11,11 |     |     |     |  |  |  | 1,0 | 1,2 | 5,1E-02 |
| Q55862 | Sll0588 protein OS=Synecocystis sp. (strain PCC 6803 / Kazusa) GN=sll05       | 11,07 |     |     |     |  |  |  | 0,8 | 0,8 | 0,7E-01 |
| Q55852 | Sll0596 protein OS=Synecocystis sp. (strain PCC 6803 / Kazusa) GN=sll05       | 22,54 |     |     |     |  |  |  | 1,5 | 1,2 | 4,7E-04 |
| Q55726 | Sll0602 protein OS=Synecocystis sp. (strain PCC 6803 / Kazusa) GN=sll06       | 4,92  |     |     |     |  |  |  | 0,9 | 0,9 | 2,0E+00 |
| Q55723 | Sll0606 protein OS=Synecocystis sp. (strain PCC 6803 / Kazusa) GN=sll06       | 4,41  |     |     |     |  |  |  | 1,7 | 1,7 | 2,0E+00 |
| P72952 | Sll0645 protein OS=Synecocystis sp. (strain PCC 6803 / Kazusa) GN=sll06       | 3,02  |     |     |     |  |  |  | 0,6 | 0,7 | 2,0E+00 |
| P72950 | Sll0647 protein OS=Synecocystis sp. (strain PCC 6803 / Kazusa) GN=sll06       | 9,77  |     | 2,5 |     |  |  |  | 1,6 | 2,5 | 3,3E-07 |
| Q55984 | Sll0659 protein OS=Synecocystis sp. (strain PCC 6803 / Kazusa) GN=sll06       | 3,26  |     |     |     |  |  |  | 0,8 | 0,8 | 2,0E+00 |
| Q55966 | Sll0678 protein OS=Synecocystis sp. (strain PCC 6803 / Kazusa) GN=sll06       | 12,22 |     |     |     |  |  |  | 0,5 | 0,5 | 2,0E+00 |
| P74630 | Sll0735 protein OS=Synecocystis sp. (strain PCC 6803 / Kazusa) GN=sll07       | 7,94  |     |     |     |  |  |  | 2,2 | 2,1 | 2,0E+00 |
| Q55953 | Sll0751 protein OS=Synecocystis sp. (strain PCC 6803 / Kazusa) GN=sll07       | 45,81 |     |     |     |  |  |  | 1,8 | 0,9 | 1,4E-01 |
| Q55943 | Sll0788 protein OS=Synecocystis sp. (strain PCC 6803 / Kazusa) GN=sll07       | 12,76 |     |     |     |  |  |  | 0,4 | 0,4 | 2,0E+00 |
| Q55432 | Sll0822 protein OS=Synecocystis sp. (strain PCC 6803 / Kazusa) GN=sll08       | 31,78 |     |     |     |  |  |  | 0,7 | 0,7 | 0,0E+00 |
| P73762 | Sll0837 protein OS=Synecocystis sp. (strain PCC 6803 / Kazusa) GN=sll08       | 15,99 |     |     |     |  |  |  | 0,6 | 0,6 | 0,9E+00 |
| P73746 | Sll0844 protein OS=Synecocystis sp. (strain PCC 6803 / Kazusa) GN=sll08       | 18,18 |     |     |     |  |  |  | 1,7 | 1,1 | 2,6E-02 |
| Q55361 | Sll0887 protein OS=Synecocystis sp. (strain PCC 6803 / Kazusa) GN=sll08       | 27,13 |     |     |     |  |  |  | 1,4 | 2,4 | 9,4E-04 |
| Q55360 | Sll0888 protein OS=Synecocystis sp. (strain PCC 6803 / Kazusa) GN=sll08       | 16,84 |     |     |     |  |  |  | 1,2 | 2,4 | 1,1E-02 |
| P73130 | Sll0995 protein OS=Synecocystis sp. (strain PCC 6803 / Kazusa) GN=sll09       | 11,69 |     |     |     |  |  |  | 1,2 | 1,1 | 2,0E+00 |
| P72756 | Sll1033 protein OS=Synecocystis sp. (strain PCC 6803 / Kazusa) GN=sll10       | 2,54  |     |     |     |  |  |  | 0,5 | 0,8 | 1,0E-03 |
| P72751 | Sll1036 protein OS=Synecocystis sp. (strain PCC 6803 / Kazusa) GN=sll10       | 11,21 |     |     |     |  |  |  | 2,2 | 1,7 | 1,4E-01 |
| P7265  |                                                                               |       |     |     |     |  |  |  |     |     |         |

|        |                                                                                  |       |      |     |     |         |         |
|--------|----------------------------------------------------------------------------------|-------|------|-----|-----|---------|---------|
| Q55660 | Sir0001 protein OS=Synecocystis sp. (strain PCC 6803 / Kazusa) GN=sir0C          | 39,38 |      |     |     |         |         |
| Q55667 | Sir0006 protein OS=Synecocystis sp. (strain PCC 6803 / Kazusa) GN=sir0C          | 8,76  | 2,7  | 2,3 | 1,3 | 2,1     | 1,7E-03 |
| Q55449 | Sir0021 protein OS=Synecocystis sp. (strain PCC 6803 / Kazusa) GN=sir0C          | 6,34  | 4,1  | 3,2 | 2,2 | 1,7     | 2,0E+00 |
| Q55131 | Sir0049 protein OS=Synecocystis sp. (strain PCC 6803 / Kazusa) GN=sir0C          | 11,06 | 0,5  | 0,6 | 0,9 | 0,6     | 4,1E-03 |
| P74445 | Sir0146 protein OS=Synecocystis sp. (strain PCC 6803 / Kazusa) GN=sir0I          | 12,94 | 0,5  | 0,5 | 0,5 | 0,5     | 2,0E+00 |
| P74446 | Sir0147 protein OS=Synecocystis sp. (strain PCC 6803 / Kazusa) GN=sir0I          | 13,01 | 0,5  | 0,5 | 0,5 | 0,5     | 0,0E+00 |
| P74448 | Sir0150 protein OS=Synecocystis sp. (strain PCC 6803 / Kazusa) GN=sir0I          | 20,51 | 0,7  | 0,7 | 0,7 | 0,7     | 6,6E-01 |
| P74450 | Sir0151 protein OS=Synecocystis sp. (strain PCC 6803 / Kazusa) GN=sir0I          | 25,62 | 0,5  | 0,4 | 0,7 | 0,6     | 4,4E-06 |
| Q55573 | Sir0184 protein OS=Synecocystis sp. (strain PCC 6803 / Kazusa) GN=sir0I          | 9,71  |      |     | 1,6 | 1,5     | 2,0E+00 |
| Q55780 | Sir0208 protein OS=Synecocystis sp. (strain PCC 6803 / Kazusa) GN=sir0Z          | 8,49  | 0,7  | 0,5 | 0,7 | 0,6     | 1,3E-06 |
| Q55782 | Sir0209 protein OS=Synecocystis sp. (strain PCC 6803 / Kazusa) GN=sir0Z          | 7,18  | 0,4  | 0,8 | 0,9 | 0,7     | 1,4E-01 |
| Q55698 | Sir0236 protein OS=Synecocystis sp. (strain PCC 6803 / Kazusa) GN=sir0Z          | 2,9   | 1,1  | 1,3 | 1,3 | 1,1     | 2,0E+00 |
| P72690 | Sir0236 protein OS=Synecocystis sp. (strain PCC 6803 / Kazusa) GN=sir0Z          | 7,21  |      |     | 1,4 | 1,3     | 2,0E+00 |
| P72700 | Sir0244 protein OS=Synecocystis sp. (strain PCC 6803 / Kazusa) GN=sir0Z          | 33,45 |      | 1,0 | 1,1 | 1,0     | 8,7E-01 |
| P72709 | Sir0250 protein OS=Synecocystis sp. (strain PCC 6803 / Kazusa) GN=sir0Z          | 14,61 | 0,8  | 0,5 | 1,1 | 0,4     | 2,0E+00 |
| P74386 | Sir0280 protein OS=Synecocystis sp. (strain PCC 6803 / Kazusa) GN=sir0Z          | 7,67  | 0,6  |     | 0,9 | 0,8     | 2,0E+00 |
| Q55922 | Sir0315 protein OS=Synecocystis sp. (strain PCC 6803 / Kazusa) GN=sir0Z          | 7,79  | 0,8  |     | 1,4 | 1,3     | 2,0E+00 |
| Q55541 | Sir0333 protein OS=Synecocystis sp. (strain PCC 6803 / Kazusa) GN=sir0Z          | 37,74 | 0,3  | 0,3 | 1,9 | 0,5     | 5,5E-06 |
| Q55542 | Sir0334 protein OS=Synecocystis sp. (strain PCC 6803 / Kazusa) GN=sir0Z          | 13,64 | 0,2  | 0,2 | 2,0 | 2,3     | 0,0E+00 |
| Q55650 | Sir0355 protein OS=Synecocystis sp. (strain PCC 6803 / Kazusa) GN=sir0Z          | 9,67  | 1,6  | 1,2 | 2,0 | 2,3     | 2,0E+00 |
| Q55737 | Sir0361 protein OS=Synecocystis sp. (strain PCC 6803 / Kazusa) GN=sir0Z          | 14,38 | 0,3  | 1,2 | 1,2 | 1,1     | 7,1E-03 |
| Q55113 | Sir0431 protein OS=Synecocystis sp. (strain PCC 6803 / Kazusa) GN=sir0Z          | 20,8  | 0,8  | 0,5 | 0,5 | 0,6     | 7,2E-04 |
| P74375 | Sir0442 protein OS=Synecocystis sp. (strain PCC 6803 / Kazusa) GN=sir0Z          | 12,77 | 2,2  | 1,1 | 0,7 | 1,3     | 5,9E-01 |
| P74379 | Sir0443 protein OS=Synecocystis sp. (strain PCC 6803 / Kazusa) GN=sir0Z          | 21,6  | 0,4  | 0,4 | 0,3 | 0,5     | 0,0E+00 |
| P74694 | Sir0455 protein OS=Synecocystis sp. (strain PCC 6803 / Kazusa) GN=sir0Z          | 19,15 | 0,4  | 0,4 | 1,2 | 1,2     | 2,0E+00 |
| Q55171 | Sir0476 protein OS=Synecocystis sp. (strain PCC 6803 / Kazusa) GN=sir0Z          | 27,94 | 0,4  | 0,4 | 0,5 | 0,5     | 1,1E-12 |
| Q55176 | Sir0483 protein OS=Synecocystis sp. (strain PCC 6803 / Kazusa) GN=sir0Z          | 25,5  | 0,7  | 0,6 | 0,9 | 0,7     | 4,2E-03 |
| Q55514 | Sir0552 protein OS=Synecocystis sp. (strain PCC 6803 / Kazusa) GN=sir0Z          | 27,87 | 0,9  | 0,8 | 0,9 | 0,8     | 1,7E-02 |
| Q55392 | Sir0565 protein OS=Synecocystis sp. (strain PCC 6803 / Kazusa) GN=sir0Z          | 3,69  |      |     |     |         | 2,0E+00 |
| P74746 | Sir0600 protein OS=Synecocystis sp. (strain PCC 6803 / Kazusa) GN=sir0Z          | 10,12 | 1,6  | 1,1 | 0,6 | 0,8     | 1,9E-03 |
| P74752 | Sir0605 protein OS=Synecocystis sp. (strain PCC 6803 / Kazusa) GN=sir0Z          | 10,03 | 2,8  | 3,8 | 3,8 | 3,1     | 4,5E-14 |
| P74753 | Sir0606 protein OS=Synecocystis sp. (strain PCC 6803 / Kazusa) GN=sir0Z          | 6,62  |      |     | 1,1 | 1,1     | 2,0E+00 |
| Q55727 | Sir0645 protein OS=Synecocystis sp. (strain PCC 6803 / Kazusa) GN=sir0Z          | 57,77 | 2,8  | 2,2 | 1,0 | 1,8     | 5,7E-02 |
| P74584 | Sir0667 protein OS=Synecocystis sp. (strain PCC 6803 / Kazusa) GN=sir0Z          | 7,51  |      |     | 0,9 | 0,8     | 2,0E+00 |
| P72937 | Sir0670 protein OS=Synecocystis sp. (strain PCC 6803 / Kazusa) GN=sir0Z          | 31,27 | 0,9  | 2,0 | 1,9 | 1,6     | 1,1E-01 |
| P72967 | Sir0695 protein OS=Synecocystis sp. (strain PCC 6803 / Kazusa) GN=sir0Z          | 21,97 | 0,8  | 0,7 | 0,7 | 0,7     | 4,5E-12 |
| Q55972 | Sir0708 protein OS=Synecocystis sp. (strain PCC 6803 / Kazusa) GN=sir0Z          | 10,2  |      |     | 0,5 | 0,5     | 3,8E-03 |
| P72675 | Sir0731 protein OS=Synecocystis sp. (strain PCC 6803 / Kazusa) GN=sir0Z          | 12,19 | 0,5  | 0,2 | 1,0 | 0,7     | 3,0E-01 |
| Q54526 | Sir0741 protein OS=Synecocystis sp. (strain PCC 6803 / Kazusa) GN=sir0Z          | 10,3  | 1,2  | 1,1 | 1,1 | 0,5     | 1,9E-03 |
| Q54536 | Sir0848 protein OS=Synecocystis sp. (strain PCC 6803 / Kazusa) GN=sir0Z          | 24,55 | 0,9  | 0,8 | 0,6 | 0,7     | 1,1E-02 |
| P73556 | Sir0876 protein OS=Synecocystis sp. (strain PCC 6803 / Kazusa) GN=sir0Z          | 7,58  | 0,6  | 0,6 | 0,6 | 0,6     | 2,0E+00 |
| Q55374 | Sir0907 protein OS=Synecocystis sp. (strain PCC 6803 / Kazusa) GN=sir0Z          | 4,93  | 0,3  |     | 1,1 | 0,8     | 3,6E-01 |
| Q55375 | Sir0908 protein OS=Synecocystis sp. (strain PCC 6803 / Kazusa) GN=sir0Z          | 5,33  |      |     | 0,9 | 0,9     | 2,0E+00 |
| Q55376 | Sir0912 protein OS=Synecocystis sp. (strain PCC 6803 / Kazusa) GN=sir0Z          | 8,14  | 1,6  | 1,5 | 0,9 | 1,2     | 2,0E+00 |
| Q55386 | Sir0924 protein OS=Synecocystis sp. (strain PCC 6803 / Kazusa) GN=sir0Z          | 14,34 | 1,0  | 0,4 | 0,4 | 0,7     | 3,1E-02 |
| Q55501 | Sir0929 protein OS=Synecocystis sp. (strain PCC 6803 / Kazusa) GN=sir0Z          | 15,9  | 0,9  | 0,9 | 1,0 | 0,9     | 5,9E-02 |
| P74302 | Sir0937 protein OS=Synecocystis sp. (strain PCC 6803 / Kazusa) GN=sir0Z          | 11,99 | 0,5  | 0,5 | 0,4 | 0,5     | 0,0E+00 |
| P72952 | Sir0940 protein OS=Synecocystis sp. (strain PCC 6803 / Kazusa) GN=sir0Z          | 5,66  |      |     | 1,0 | 1,0     | 2,0E+00 |
| P73007 | Sir1043 protein OS=Synecocystis sp. (strain PCC 6803 / Kazusa) GN=sir1I          | 14,44 | 0,9  | 0,9 |     | 1,0     | 2,0E+00 |
| P72741 | Sir1097 protein OS=Synecocystis sp. (strain PCC 6803 / Kazusa) GN=sir1I          | 26,38 | 0,8  | 0,8 | 1,0 | 0,9     | 1,8E-01 |
| P72747 | Sir1103 protein OS=Synecocystis sp. (strain PCC 6803 / Kazusa) GN=sir1I          | 3,97  | 1,4  | 0,6 | 1,4 | 1,3     | 0,0E+00 |
| P71423 | Sir1160 protein OS=Synecocystis sp. (strain PCC 6803 / Kazusa) GN=sir1I          | 40,2  | 0,5  | 0,5 | 0,5 | 0,5     | 0,0E+00 |
| P74236 | Sir1161 protein OS=Synecocystis sp. (strain PCC 6803 / Kazusa) GN=sir1I          | 8,54  | 0,6  |     | 0,8 | 0,9     | 6,3E-01 |
| P74718 | Sir1189 protein OS=Synecocystis sp. (strain PCC 6803 / Kazusa) GN=sir1I          | 8,55  |      |     | 0,8 | 0,8     | 2,0E+00 |
| P73342 | Sir1194 protein OS=Synecocystis sp. (strain PCC 6803 / Kazusa) GN=sir1I          | 9,46  |      | 1,4 | 1,6 | 2,0E+00 |         |
| P73344 | Sir1196 protein OS=Synecocystis sp. (strain PCC 6803 / Kazusa) GN=sir1I          | 3,96  | 1,0  |     | 1,6 | 2,0E+00 |         |
| P73343 | Sir1197 protein OS=Synecocystis sp. (strain PCC 6803 / Kazusa) GN=sir1I          | 19,19 | 1,4  | 1,0 | 0,8 | 0,9     | 1,7E-01 |
| P73497 | Sir1240 protein OS=Synecocystis sp. (strain PCC 6803 / Kazusa) GN=sir1Z          | 14,53 |      |     | 0,8 | 0,8     | 2,0E+00 |
| P73803 | Sir1263 protein OS=Synecocystis sp. (strain PCC 6803 / Kazusa) GN=sir1Z          | 8,94  | 1,1  | 0,8 | 0,7 | 0,9     | 2,9E-01 |
| P74188 | Sir1276 protein OS=Synecocystis sp. (strain PCC 6803 / Kazusa) GN=sir1Z          | 13,45 | 2,1  | 2,0 | 1,3 | 1,9     | 1,1E-04 |
| P72839 | Sir1301 protein OS=Synecocystis sp. (strain PCC 6803 / Kazusa) GN=sir1Z          | 19,63 | 1,5  | 1,2 | 0,8 | 1,2     | 4,7E-01 |
| P74074 | Sir1338 protein OS=Synecocystis sp. (strain PCC 6803 / Kazusa) GN=sir1Z          | 10,12 | 1,2  | 1,6 | 1,2 | 1,7     | 1,6E-03 |
| P74079 | Sir1342 protein OS=Synecocystis sp. (strain PCC 6803 / Kazusa) GN=sir1Z          | 18,43 | 0,7  |     | 1,4 | 1,0     | 9,6E-01 |
| P73592 | Sir1406 protein OS=Synecocystis sp. (strain PCC 6803 / Kazusa) GN=sir1Z          | 13,26 | 0,8  | 1,0 | 0,8 | 0,8     | 2,0E+00 |
| P73503 | Sir1437 protein OS=Synecocystis sp. (strain PCC 6803 / Kazusa) GN=sir1Z          | 32,14 | 1,0  |     | 1,0 | 1,0     | 3,8E-01 |
| P73508 | Sir1440 protein OS=Synecocystis sp. (strain PCC 6803 / Kazusa) GN=sir1Z          | 16,79 |      |     | 1,6 | 1,2     | 2,0E+00 |
| P74154 | Sir1470 protein OS=Synecocystis sp. (strain PCC 6803 / Kazusa) GN=sir1Z          | 12,21 |      |     | 1,0 | 1,0     | 2,0E+00 |
| P73946 | Sir1506 protein OS=Synecocystis sp. (strain PCC 6803 / Kazusa) GN=sir1Z          | 13,02 | 2,3  | 0,7 | 0,7 | 1,2     | 7,5E-01 |
| P73953 | Sir1512 protein OS=Synecocystis sp. (strain PCC 6803 / Kazusa) GN=sir1Z          | 7,22  |      |     | 3,6 | 7,0     | 2,0E+00 |
| P74219 | Sir1533 protein OS=Synecocystis sp. (strain PCC 6803 / Kazusa) GN=sir1Z          | 29,57 | 0,8  | 0,8 | 0,7 | 0,6     | 9,5E-03 |
| P73424 | Sir1540 protein OS=Synecocystis sp. (strain PCC 6803 / Kazusa) GN=sir1Z          | 28,3  | 1,1  | 1,2 | 1,6 | 1,4     | 6,8E-01 |
| P74588 | Sir1557 protein OS=Synecocystis sp. (strain PCC 6803 / Kazusa) GN=sir1Z          | 7,59  | 0,4  | 0,5 | 0,7 | 0,6     | 7,1E-06 |
| P72968 | Sir1590 protein OS=Synecocystis sp. (strain PCC 6803 / Kazusa) GN=sir1Z          | 10,51 | 1,1  | 1,2 | 1,1 | 1,2     | 1,4E-03 |
| P72985 | Sir1600 protein OS=Synecocystis sp. (strain PCC 6803 / Kazusa) GN=sir1Z          | 24,83 | 0,2  |     | 0,3 | 0,2     | 0,0E+00 |
| P72991 | Sir1613 protein OS=Synecocystis sp. (strain PCC 6803 / Kazusa) GN=sir1Z          | 17,76 | 1,6  | 1,2 | 1,4 | 1,6     | 3,2E-03 |
| P72895 | Sir1617 protein OS=Synecocystis sp. (strain PCC 6803 / Kazusa) GN=sir1Z          | 8,52  | 2,6  |     | 1,6 | 1,1     | 9,0E-01 |
| P72897 | Sir1619 protein OS=Synecocystis sp. (strain PCC 6803 / Kazusa) GN=sir1Z          | 7,23  | 1,5  | 1,0 | 1,0 | 1,5     | 2,6E-01 |
| P74673 | Sir1668 protein OS=Synecocystis sp. (strain PCC 6803 / Kazusa) GN=sir1Z          | 9,29  |      |     | 1,1 | 1,0     | 2,0E+00 |
| P73716 | Sir1732 protein OS=Synecocystis sp. (strain PCC 6803 / Kazusa) GN=sir1Z          | 12,75 |      |     | 0,4 | 0,6     | 2,0E+00 |
| P73049 | Sir1768 protein OS=Synecocystis sp. (strain PCC 6803 / Kazusa) GN=sir1Z          | 4,1   | 0,7  | 2,2 | 1,2 | 1,7     | 0,0E+00 |
| P72765 | Sir1772 protein OS=Synecocystis sp. (strain PCC 6803 / Kazusa) GN=sir1Z          | 7,16  |      |     | 2,2 | 2,6     | 2,0E+00 |
| P72799 | Sir1794 protein OS=Synecocystis sp. (strain PCC 6803 / Kazusa) GN=sir1Z          | 11,6  | 0,8  | 1,0 | 1,2 | 1,0     | 7,5E-01 |
| P72814 | Sir1800 protein OS=Synecocystis sp. (strain PCC 6803 / Kazusa) GN=sir1Z          | 8,17  | 0,9  | 1,1 | 1,2 | 1,1     | 3,9E-01 |
| P73937 | Sir1812 protein OS=Synecocystis sp. (strain PCC 6803 / Kazusa) GN=sir1Z          | 12,03 | 0,9  | 0,9 | 1,2 | 0,8     | 9,8E-03 |
| P73698 | Sir1813 protein OS=Synecocystis sp. (strain PCC 6803 / Kazusa) GN=sir1Z          | 9,15  |      |     | 1,9 | 1,6     | 2,0E+00 |
| P73699 | Sir1814 protein OS=Synecocystis sp. (strain PCC 6803 / Kazusa) GN=sir1Z          | 12,34 | 1,2  |     | 1,3 | 2,0E+00 |         |
| P73706 | Sir1818 protein OS=Synecocystis sp. (strain PCC 6803 / Kazusa) GN=sir1Z          | 8,46  |      | 0,8 | 0,8 | 0,8     | 2,0E+00 |
| P73389 | Sir1829 protein OS=Synecocystis sp. (strain PCC 6803 / Kazusa) GN=sir1Z          | 5,76  |      |     | 1,0 | 1,0     | 2,0E+00 |
| P73409 | Sir1841 protein OS=Synecocystis sp. (strain PCC 6803 / Kazusa) GN=sir1Z          | 17,78 | 0,5  | 0,3 | 1,2 | 0,7     | 2,0E-01 |
| P73603 | Sir1852 protein OS=Synecocystis sp. (strain PCC 6803 / Kazusa) GN=sir1Z          | 52,66 | 0,9  | 0,5 | 0,5 | 0,7     | 2,3E-02 |
| P73604 | Sir1853 protein OS=Synecocystis sp. (strain PCC 6803 / Kazusa) GN=sir1Z          | 20,35 | 0,4  | 0,3 | 0,2 | 0,3     | 1,8E-10 |
| P73605 | Sir1854 protein OS=Synecocystis sp. (strain PCC 6803 / Kazusa) GN=sir1Z          | 51,52 | 0,6  | 0,3 | 0,3 | 0,4     | 1,6E-06 |
| P73606 | Sir1855 protein OS=Synecocystis sp. (strain PCC 6803 / Kazusa) GN=sir1Z          | 48,93 | 1,0  | 0,7 | 0,6 | 0,7     | 6,3E-01 |
| P73328 | Sir1900 protein OS=Synecocystis sp. (strain PCC 6803 / Kazusa) GN=sir1Z          | 22,67 | 2,0  | 1,4 | 0,9 | 1,9     | 1,4E-01 |
| P73103 | Sir1908 protein OS=Synecocystis sp. (strain PCC 6803 / Kazusa) GN=sir1Z          | 19,12 | 0,9  | 0,5 | 0,9 | 0,8     | 1,4E-01 |
| P74473 | Sir1923 protein OS=Synecocystis sp. (strain PCC 6803 / Kazusa) GN=sir1Z          | 4,02  |      |     | 1,8 | 2,0E+00 |         |
| P74478 | Sir1926 protein OS=Synecocystis sp. (strain PCC 6803 / Kazusa) GN=sir1Z          | 14,35 | 0,8  | 0,8 | 0,5 | 0,7     | 1,3E-12 |
| P74500 | Sir1940 protein OS=Synecocystis sp. (strain PCC 6803 / Kazusa) GN=sir1Z          | 14,73 |      |     | 1,3 | 1,3     | 2,0E+00 |
| P74506 | Sir1944 protein OS=Synecocystis sp. (strain PCC 6803 / Kazusa) GN=sir1Z          | 6,69  | 0,5  | 0,4 | 0,3 | 0,4     | 0,0E+00 |
| P74094 | Sir1958 protein OS=Synecocystis sp. (strain PCC 6803 / Kazusa) GN=sir1Z          | 17    |      | 0,7 | 0,9 | 0,8     | 4,6E-03 |
| P74100 | Sir1962 protein OS=Synecocystis sp. (strain PCC 6803 / Kazusa) GN=sir1Z          | 5,14  |      | 1,2 | 0,7 | 1,0     | 7,5E-01 |
| P71113 | Sir1978 protein OS=Synecocystis sp. (strain PCC 6803 / Kazusa) GN=sir1Z          | 22,23 | 0,9  | 1,1 | 1,2 | 1,1     | 3,9E-01 |
| P73222 | Sir2005 protein OS=Synecocystis sp. (strain PCC 6803 / Kazusa) GN=sir2Z          | 13,03 | 1,1  | 0,5 | 0,6 | 0,5     | 0,0E+00 |
| P73244 | Sir2025 protein OS=Synecocystis sp. (strain PCC 6803 / Kazusa) GN=sir2Z          | 25,49 | 1,5  | 1,5 | 1,3 | 1,5     | 3,5E-10 |
| P73812 | Sir2060 protein OS=Synecocystis sp. (strain PCC 6803 / Kazusa) GN=sir2Z          | 4,09  | 0,8  | 0,9 | 1,4 | 1,0     | 9,4E-01 |
| P73370 | Sir2070 protein OS=Synecocystis sp. (strain PCC 6803 / Kazusa) GN=sir2Z          | 15,14 | 0,8  | 0,8 | 1,1 | 0,9     | 3,0E-01 |
| P73934 | Sir2106 protein OS=Synecocystis sp. (strain PCC 6803 / Kazusa) GN=sir2Z          | 3,97  | 1,0  | 1,9 | 1,9 | 2,0E+00 |         |
| P73681 | Sir2144 protein OS=Synecocystis sp. (strain PCC 6803 / Kazusa) GN=sir2Z          | 9,63  | 0,9  | 0,9 | 1,0 | 1,0     | 2,4E-01 |
| Q6ZEP2 | Sir5088 protein OS=Synecocystis sp. (strain PCC 6803 / Kazusa) GN=sir5C          | 16,81 | 10,4 |     |     | 10,4    | 2,0E+00 |
| Q6YRQ8 | Sir6096 protein OS=Synecocystis sp. (strain PCC 6803 / Kazusa) GN=sir6C          | 5,36  |      |     | 0,9 | 1,0     | 2,0E+00 |
| Q6ZEE6 | Sir7012 protein OS=Synecocystis sp. (strain PCC 6803 / Kazusa) GN=sir7Z          | 23,1  | 3,4  | 3,7 | 1,7 | 4,9     | 9,1E-05 |
| Q6ZEE5 | Sir7073 protein OS=Synecocystis sp. (strain PCC 6803 / Kazusa) GN=sir7Z          | 19,3  |      | 1,4 | 1,0 | 1,3     | 2,0E+00 |
| P74281 | Soluble hydrogenase 42 kD subunit OS=Synecocystis sp. (strain PCC 6803 / Kazusa) | 44,79 | 2,2  | 2,2 | 1,0 | 2,2     | 3,7E-02 |
| P73722 | SOS function regulatory protein OS=Synecocystis sp. (strain PCC 6803 / Kazusa)   | 50,25 | 0,1  | 0,4 | 0,4 | 0,5     | 0,0E+00 |
| P73914 | Squalene-hopene cyclase OS=Synecocystis sp. (strain PCC 6803 / Kazusa)           | 10,36 | 3,9  | 4,1 | 1,5 | 3,6     | 1,1E-03 |
| P74735 | Ss0352 protein OS=Synecocystis sp. (strain PCC 6803 / Kazusa) GN=ss0             | 36,21 |      |     | 1,2 | 1,3     | 2,0E+00 |
| P73875 | Ss0467 protein OS=Synecocystis sp. (strain PCC 6803 / Kazusa) GN=ss0             | 30,99 |      |     | 0,5 | 0,5     | 2,0E+00 |
| P74067 | Ss1498 protein OS=Synecocystis sp. (strain PCC 6803 / Kazusa) GN=ss1             | 24,59 |      |     | 0,7 | 0,7     | 2,0E+00 |
| P73031 | Ss1918 protein OS=Synecocystis sp. (strain PCC 6803 / Kazusa) GN=ss1             | 18,56 |      | 1,1 |     | 1,1     | 2       |

|        |                                                                            |       |     |  |      |  |     |     |         |
|--------|----------------------------------------------------------------------------|-------|-----|--|------|--|-----|-----|---------|
| Q59992 | Tryptophan synthase beta chain OS=Synechocystis sp. (strain PCC 6803 / K   | 17.48 | 1.3 |  | 1.8  |  | 1.7 | 1.5 | 1.3E-07 |
| P73655 | Tryptophan-tRNA ligase OS=Synechocystis sp. (strain PCC 6803 / Kazusa)     | 6.53  | 0.8 |  |      |  |     | 0.7 | 2.0E+00 |
| P74463 | Twitching motility protein OS=Synechocystis sp. (strain PCC 6803 / Kazusa) | 21.95 | 0.5 |  |      |  | 0.8 | 0.8 | 7.7E-02 |
| Q55673 | UDP-N-acetylglucosamine 1-carboxyvinyltransferase OS=Synechocystis sp.     | 5.94  | 1.6 |  | 0.4  |  | 0.6 | 0.9 | 4.8E-01 |
| Q55469 | UDP-N-acetylmuramoyl-L-alanyl-D-glutamate-2,6-diaminopimelate ligase O     | 10.3  | 0.5 |  | 0.3  |  |     | 0.4 | 6.1E-11 |
| P45450 | UDP-N-acetylmuramoyl-tripeptide-D-alanyl-D-alanine ligase OS=Synechoc      | 7.93  | 1.4 |  |      |  |     | 1.4 | 2.0E+00 |
| P73668 | UDP-N-acetylmuramoylalanine-D-glutamate ligase OS=Synechocystis sp. (      | 6.19  | 0.4 |  | 0.5  |  | 1.1 | 0.8 | 1.2E-01 |
| P22040 | Uncharacterized ABC transporter ATP-binding protein sll0415 OS=Synechoc    | 6.78  | 1.0 |  |      |  | 1.2 | 1.2 | 2.0E+00 |
| P73335 | Uncharacterized deoxyribonuclease sll1786 OS=Synechocystis sp. (strain P   | 24.9  | 2.6 |  | 2.0  |  | 1.3 | 1.9 | 2.4E-03 |
| Q6ZES9 | Uncharacterized protein OS=Synechocystis sp. (strain PCC 6803 / Kazusa)    | 21.54 | 1.5 |  |      |  | 0.7 | 0.7 | 2.0E+00 |
| Q6ZED7 | Uncharacterized protein OS=Synechocystis sp. (strain PCC 6803 / Kazusa)    | 4.27  | 1.5 |  |      |  |     | 1.6 | 2.0E+00 |
| Q55707 | Uncharacterized protein sll0517 OS=Synechocystis sp. (strain PCC 6803 / K  | 34.46 | 0.6 |  | 0.5  |  | 0.3 | 0.4 | 2.5E-05 |
| P72861 | Uncharacterized protein sll0936 OS=Synechocystis sp. (strain PCC 6803 / K  | 4.59  | 1.0 |  |      |  | 2.0 | 1.2 | 2.7E-01 |
| P72929 | Uncharacterized protein sll1021 OS=Synechocystis sp. (strain PCC 6803 / K  | 12.33 | 0.9 |  | 0.8  |  | 0.7 | 0.7 | 1.9E-03 |
| P74178 | Uncharacterized protein sll1178 OS=Synechocystis sp. (strain PCC 6803 / K  | 5.2   | 2.1 |  |      |  | 0.9 | 1.0 | 2.0E+00 |
| P73599 | Uncharacterized protein sll1304 OS=Synechocystis sp. (strain PCC 6803 / K  | 11.15 | 1.3 |  | 1.3  |  | 0.6 | 1.4 | 6.0E-01 |
| P74360 | Uncharacterized protein sll1526 OS=Synechocystis sp. (strain PCC 6803 / K  | 14.03 | 0.5 |  | 0.6  |  | 1.0 | 0.7 | 6.4E-02 |
| P73392 | Uncharacterized protein sll1735 OS=Synechocystis sp. (strain PCC 6803 / K  | 27.07 | 6.6 |  |      |  | 2.0 | 4.2 | 3.7E-02 |
| P73602 | Uncharacterized protein sll1783 OS=Synechocystis sp. (strain PCC 6803 / K  | 23.13 | 0.8 |  |      |  |     | 0.8 | 2.0E+00 |
| Q55458 | Uncharacterized protein sll0039 OS=Synechocystis sp. (strain PCC 6803 / K  | 11.2  | 1.1 |  | 1.3  |  | 1.5 | 1.3 | 4.6E-04 |
| Q55629 | Uncharacterized protein sll0782 OS=Synechocystis sp. (strain PCC 6803 / K  | 9.98  | 1.0 |  |      |  | 1.0 | 1.0 | 2.0E+00 |
| P72655 | Uncharacterized protein sll1128 OS=Synechocystis sp. (strain PCC 6803 / K  | 27.1  | 0.8 |  | 1.4  |  | 1.8 | 1.3 | 2.5E-01 |
| P74002 | Uncharacterized protein sll1322 OS=Synechocystis sp. (strain PCC 6803 / K  | 26.58 | 2.0 |  | 2.4  |  | 1.5 | 3.1 | 2.5E-06 |
| P73042 | Uncharacterized protein sll1764 OS=Synechocystis sp. (strain PCC 6803 / K  | 23.46 | 1.5 |  | 12.4 |  |     | 8.0 | 2.0E+00 |
| P73321 | Uncharacterized protein sll1894 OS=Synechocystis sp. (strain PCC 6803 / K  | 49.36 | 1.5 |  | 1.8  |  | 1.5 | 1.8 | 1.4E-09 |
| P73152 | Uncharacterized thylakoid-associated protein sll0962 OS=Synechocystis sp.  | 17.97 | 1.1 |  |      |  |     | 1.1 | 2.0E+00 |
| P73545 | Uncharacterized thylakoid-associated protein sll2501 OS=Synechocystis sp.  | 37.08 | 1.1 |  | 1.6  |  | 1.2 | 1.5 | 3.2E-02 |
| P74328 | Uncharacterized tRNA/rRNA methyltransferase sll0955 OS=Synechocystis s     | 14.32 | 0.7 |  | 1.2  |  | 1.1 | 1.0 | 9.5E-01 |
| Q55563 | Uncharacterized WD repeat-containing protein sll0163 OS=Synechocystis sp.  | 0.95  | 0.9 |  | 1.3  |  | 1.3 | 1.2 | 2.0E+00 |
| P74598 | Uncharacterized WD repeat-containing protein sll1491 OS=Synechocystis sp.  | 16.67 | 1.0 |  | 1.0  |  | 0.6 | 0.8 | 1.2E-01 |
| P72817 | Universal stress protein Sll1654 OS=Synechocystis sp. (strain PCC 6803 / K | 45.86 | 0.9 |  | 0.9  |  | 0.8 | 0.8 | 1.3E-05 |
| P72699 | UPF0045 protein sll0230 OS=Synechocystis sp. (strain PCC 6803 / Kazusa)    | 51.24 | 1.6 |  | 1.3  |  | 1.2 | 1.6 | 1.5E-03 |
| P74607 | UPF0296 protein sll2874 OS=Synechocystis sp. (strain PCC 6803 / Kazusa)    | 40.45 | 0.9 |  | 0.7  |  | 0.7 | 0.7 | 6.0E-04 |
| P72753 | Uracil phosphoribosyltransferase OS=Synechocystis sp. (strain PCC 6803 / I | 17.59 | 0.9 |  |      |  |     | 0.9 | 2.0E+00 |
| P73061 | Urease subunit alpha OS=Synechocystis sp. (strain PCC 6803 / Kazusa) GN    | 16.34 | 2.0 |  | 1.3  |  | 0.9 | 1.2 | 1.7E-01 |
| P73796 | Urease subunit gamma OS=Synechocystis sp. (strain PCC 6803 / Kazusa) C     | 31    | 0.7 |  |      |  | 0.8 | 0.6 | 4.7E-06 |
| P74457 | Uridylate kinase OS=Synechocystis sp. (strain PCC 6803 / Kazusa) GN=pyrI   | 6.15  | 0.7 |  |      |  |     | 0.7 | 2.0E+00 |
| P64224 | Uroporphyrinogen decarboxylase OS=Synechocystis sp. (strain PCC 6803 /     | 22.86 | 0.5 |  | 0.6  |  | 0.7 | 0.4 | 1.1E-08 |
| Q55622 | Valine-tRNA ligase OS=Synechocystis sp. (strain PCC 6803 / Kazusa) GN=     | 11.54 | 0.6 |  | 0.9  |  | 1.2 | 0.8 | 3.9E-01 |
| Q55557 | Virginiamycin B hydrolase Vqb OS=Synechocystis sp. (strain PCC 6803 / Ka   | 34.38 | 1.2 |  | 0.7  |  | 0.5 | 0.8 | 2.4E-01 |
| P73066 | Ycf23 protein OS=Synechocystis sp. (strain PCC 6803 / Kazusa) GN=ycf23     | 12.9  | 1.2 |  | 0.7  |  | 0.6 | 0.8 | 2.7E-01 |
| P74429 | Ycf39 gene product OS=Synechocystis sp. (strain PCC 6803 / Kazusa) GN=     | 3.99  | 1.1 |  |      |  | 1.3 | 1.3 | 2.0E+00 |
| P73069 | Ycf46-like protein OS=Synechocystis sp. (strain PCC 6803 / Kazusa) GN=sir  | 7.02  | 1.1 |  | 0.9  |  | 0.7 | 0.9 | 4.5E-01 |
| P72777 | Ycf54-like protein OS=Synechocystis sp. (strain PCC 6803 / Kazusa) GN=sit  | 27.62 | 1.1 |  |      |  | 0.9 | 1.0 | 5.6E-01 |
| Q55823 | Ycf66-like protein OS=Synechocystis sp. (strain PCC 6803 / Kazusa) GN=sir  | 8.01  |     |  |      |  | 0.8 | 0.8 | 2.0E+00 |
| P74306 | Zeta-carotene desaturase OS=Synechocystis sp. (strain PCC 6803 / Kazusa)   | 7.36  |     |  |      |  | 1.0 | 1.0 | 2.0E+00 |
| P74721 | Zinc-containing alcohol dehydrogenase family OS=Synechocystis sp. (strain  | 5.65  | 1.6 |  | 1.2  |  | 0.7 | 1.2 | 7.0E-01 |

Supplementary Table S7

[NiFe]-hydrogenase is essential for cyanobacterium *Synechocystis* sp. PCC 6803 aerobic growth in the dark  
Edith De Rosa, Vanessa Checchetto, Cinzia Franchin, Elisabetta Bergantino, Paola Berto, Ildiko Szabó, Giorgio M. Giacometti, Giorgio Arrigoni, and Paola Costantini

| Accession | Description                                                               | ZCoverage | Mutant Light/WT Light Replicate 1 (11/5/117) | Mutant Light/WT Light Replicate 2 (11/5/114) | Mutant Light/WT Light Replicate 3 (11/7/115) | Average | Two-Tailed Z Test |
|-----------|---------------------------------------------------------------------------|-----------|----------------------------------------------|----------------------------------------------|----------------------------------------------|---------|-------------------|
|           | >sp[CAS1_BOVIN]                                                           | 17.29     |                                              | 0.1                                          | 0.2                                          | 0.2     | 6.4E-13           |
|           | >sp[K1C10_HUMAN]                                                          | 23.1      | 0.9                                          | 1.2                                          | 1.2                                          | 1.1     | 4.9E-01           |
|           | >sp[K1C9_HUMAN]                                                           | 14.29     | 1.0                                          | 1.1                                          | 1.0                                          | 1.1     | 3.8E-02           |
|           | >sp[K2E_HUMAN]                                                            | 19.38     | 0.7                                          | 1.2                                          | 1.0                                          | 1.0     | 8.2E-01           |
|           | >sp[K2C1_HUMAN]                                                           | 34.06     | 0.8                                          | 1.6                                          | 1.3                                          | 1.2     | 4.0E-01           |
|           | >sp[TRYP_PIG]                                                             | 28.57     | 0.6                                          | 1.5                                          | 1.3                                          | 1.1     | 9.5E-01           |
| P74561    | 1-(5-phosphoribosyl)-5-(5-phosphoribosylamino)methylideneamino] imic      | 13.28     | 1.9                                          | 0.7                                          | 0.9                                          | 1.4     | 4.8E-01           |
| Q55063    | 1-deoxy-D-xylulose 5-phosphate reductoisomerase OS=Synchocystis s         | 6.63      | 1.3                                          | 0.7                                          | 0.7                                          | 1.0     | 8.2E-01           |
| P7397     | 1-deoxy-D-xylulose 5-phosphate synthase OS=Synchocystis sp. (strain       | 10.34     | 1.8                                          | 0.8                                          | 0.7                                          | 1.0     | 6.0E-01           |
| P52981    | 1,4-alpha-glucan branching enzyme GlgB OS=Synchocystis sp. (strain        | 17.53     | 0.7                                          | 0.6                                          | 0.7                                          | 1.0     | 7.7E-01           |
| Q05971    | 10 kDa chaperonin OS=Synchocystis sp. (strain PCC 6803 / Kazusa) C        | 72.82     | 0.5                                          | 0.7                                          | 0.6                                          | 0.6     | 2.6E-09           |
| P72977    | 16.6 kDa small heat shock protein, molecular chaperon OS=Synchocystis     | 33.56     | 0.8                                          | 0.6                                          | 2.0                                          | 0.7     | 3.4E-02           |
| P73426    | 2-C-methyl-D-erythritol 2,4-cyclodiphosphate synthase OS=Synchocyst       | 13.04     | 0.5                                          | 2.7                                          | 1.9                                          | 1.6     | 6.5E-01           |
| P48576    | 2-isopropylmalate synthase OS=Synchocystis sp. (strain PCC 6803 / K       | 4.5       | 1.5                                          | 2.3                                          | 0.6                                          | 1.5     | 2.0E+00           |
| P74507    | 2,3-bisphosphoglycerate-independent phosphoglycerate mutase OS=Sy         | 13.72     | 0.6                                          | 0.8                                          | 1.2                                          | 0.9     | 3.9E-01           |
| P73264    | 3-amino-5-hydroxybenzoate synthase OS=Synchocystis sp. (strain I          | 42.06     | 0.7                                          | 2.3                                          | 0.9                                          | 1.6     | 2.9E-01           |
| P73997    | 3-dehydroquinate synthase OS=Synchocystis sp. (strain PCC 6803 / K        | 15.24     | 0.9                                          | 0.9                                          | 1.9                                          | 0.9     | 0.0E+00           |
| P73846    | 3-hydroxyacyl [acyl-carrier-protein] dehydratase FatzZ OS=Synchocystis    | 24.39     | 1.1                                          | 1.9                                          | 1.9                                          | 1.9     | 2.3E-02           |
| P54384    | 3-isopropylmalate dehydratase large subunit OS=Synchocystis sp. (str      | 4.06      | 1.3                                          | 4.4                                          | 2.3                                          | 2.7     | 1.3E-02           |
| P74207    | 3-isopropylmalate dehydratase small subunit OS=Synchocystis sp. (str      | 10        | 1.1                                          | 2.6                                          | 2.6                                          | 2.6     | 2.0E+00           |
| P73960    | 3-isopropylmalate dehydrogenase OS=Synchocystis sp. (strain PCC B6        | 10.77     |                                              |                                              | 0.7                                          | 0.9     | 6.1E-01           |
| Q55596    | 3-ketooacyl carrier protein reductase OS=Synchocystis sp. (strain F       | 21.24     | 3.9                                          |                                              |                                              | 3.9     | 2.0E+00           |
| P73574    | 3-oxoacyl [acyl-carrier-protein] reductase 1 OS=Synchocystis sp. (strain  | 18.62     |                                              | 0.8                                          | 0.8                                          | 0.7     | 3.7E-04           |
| P73826    | 3-oxoacyl [acyl-carrier-protein] reductase 2 OS=Synchocystis sp. (strain  | 34.58     |                                              | 0.5                                          | 0.4                                          | 0.5     | 0.0E+00           |
| P73283    | 3-oxoacyl [acyl-carrier-protein] synthase 2 OS=Synchocystis sp. (strain   | 5.53      | 2.0                                          | 0.8                                          | 0.4                                          | 1.0     | 7.1E-01           |
| P73530    | 30S ribosomal protein S1 homolog A OS=Synchocystis sp. (strain PCC        | 33.54     | 1.2                                          | 1.5                                          | 1.3                                          | 1.3     | 1.1E-07           |
| P74142    | 30S ribosomal protein S10 OS=Synchocystis sp. (strain PCC 6803 / K        | 18.72     | 1.0                                          | 1.7                                          | 1.0                                          | 1.1     | 6.1E-01           |
| P74226    | 30S ribosomal protein S10 OS=Synchocystis sp. (strain PCC 6803 / K        | 45.71     | 1.6                                          | 1.4                                          | 1.0                                          | 1.3     | 3.9E-02           |
| P73298    | 30S ribosomal protein S11 OS=Synchocystis sp. (strain PCC 6803 / K        | 32.31     | 2.4                                          | 1.5                                          | 1.4                                          | 1.8     | 1.1E-03           |
| P74230    | 30S ribosomal protein S12 OS=Synchocystis sp. (strain PCC 6803 / Ka       | 30.16     | 3.0                                          | 1.2                                          | 2.1                                          | 2.1     | 8.5E-03           |
| P73299    | 30S ribosomal protein S13 OS=Synchocystis sp. (strain PCC 6803 / Ka       | 54.33     | 1.6                                          | 1.6                                          | 1.6                                          | 1.6     | 1.6E-38           |
| P48944    | 30S ribosomal protein S14 OS=Synchocystis sp. (strain PCC 6803 / Ka       | 44        | 1.3                                          | 1.0                                          | 1.2                                          | 1.2     | 3.8E-02           |
| P72866    | 30S ribosomal protein S15 OS=Synchocystis sp. (strain PCC 6803 / Ka       | 33.71     | 1.8                                          | 3.4                                          | 2.4                                          | 2.5     | 1.5E-06           |
| P74410    | 30S ribosomal protein S16 OS=Synchocystis sp. (strain PCC 6803 / K        | 70.73     | 1.3                                          | 1.5                                          | 1.0                                          | 1.6     | 1.1E-05           |
| P73311    | 30S ribosomal protein S17 OS=Synchocystis sp. (strain PCC 6803 / Ka       | 66.67     | 2.0                                          | 1.3                                          | 2.5                                          | 1.9     | 5.9E-04           |
| P48944    | 30S ribosomal protein S18 OS=Synchocystis sp. (strain PCC 6803 / K        | 64.79     | 1.6                                          | 2.0                                          | 1.5                                          | 1.7     | 4.6E-19           |
| P73316    | 30S ribosomal protein S19 OS=Synchocystis sp. (strain PCC 6803 / Ka       | 36.96     | 2.8                                          | 1.7                                          | 2.0                                          | 2.0     | 2.7E-04           |
| P74071    | 30S ribosomal protein S2 OS=Synchocystis sp. (strain PCC 6803 / Kaz       | 35.32     | 2.5                                          | 2.0                                          | 1.5                                          | 2.1     | 1.5E-12           |
| P73336    | 30S ribosomal protein S20 OS=Synchocystis sp. (strain PCC 6803 / K        | 16.49     | 1.0                                          | 1.2                                          |                                              |         | 8.7E-02           |
| P48944    | 30S ribosomal protein S21 OS=Synchocystis sp. (strain PCC 6803 / Ka       | 31.67     |                                              |                                              | 0.9                                          | 0.9     | 2.0E+00           |
| P73314    | 30S ribosomal protein S3 OS=Synchocystis sp. (strain PCC 6803 / Kaz       | 36.67     | 3.5                                          | 1.6                                          | 2.4                                          | 2.2     | 1.6E-02           |
| P48939    | 30S ribosomal protein S4 OS=Synchocystis sp. (strain PCC 6803 / Kaz       | 28.22     | 1.8                                          | 1.5                                          | 2.6                                          | 2.0     | 1.1E-04           |
| P73304    | 30S ribosomal protein S5 OS=Synchocystis sp. (strain PCC 6803 / Kaz       | 61.27     | 2.5                                          | 1.4                                          | 1.7                                          | 1.9     | 8.7E-04           |
| P73636    | 30S ribosomal protein S6 OS=Synchocystis sp. (strain PCC 6803 / Kaz       | 44.25     | 1.5                                          | 1.9                                          | 1.8                                          | 1.7     | 1.8E-12           |
| P74229    | 30S ribosomal protein S7 OS=Synchocystis sp. (strain PCC 6803 / Kaz       | 53.83     | 2.0                                          | 1.6                                          | 2.0                                          | 2.0     | 0.0E+00           |
| P73307    | 30S ribosomal protein S8 OS=Synchocystis sp. (strain PCC 6803 / Kaz       | 51.88     | 2.1                                          | 1.3                                          | 2.0                                          | 1.8     | 3.8E-04           |
| P73293    | 30S ribosomal protein S9 OS=Synchocystis sp. (strain PCC 6803 / Kaz       | 37.23     | 2.8                                          | 1.6                                          | 1.9                                          | 2.1     | 1.3E-05           |
| P72785    | 4-alpha-glucanotransferase OS=Synchocystis sp. (strain PCC 6803 / K       | 8.51      | 0.9                                          | 1.0                                          | 1.6                                          | 1.2     | 4.5E-01           |
| P73672    | 4-hydroxy-3-methylcrotonyl-y-lipo synthase OS=Synchocystis                | 25.56     | 0.5                                          | 0.5                                          | 0.5                                          | 0.5     | 0.0E+00           |
| P72842    | 4-hydroxy-tetrahydrodipicolinate reductase OS=Synchocystis sp. (strain    | 7.27      |                                              |                                              | 0.9                                          | 0.9     | 2.0E+00           |
| Q55513    | 4-hydroxy-tetrahydrodipicolinate synthase OS=Synchocystis sp. (strain     | 8.31      | 0.6                                          | 0.7                                          | 0.7                                          | 0.7     | 8.5E-12           |
| P74756    | 47 kD protein OS=Synchocystis sp. (strain PCC 6803 / Kazusa) GN=stir      | 16.71     | 2.4                                          | 1.1                                          | 1.4                                          | 1.6     | 5.3E-02           |
| P73637    | 5-oxo-1,2,5-tricarboxylic-pentene acid decarboxylase/isomerase OS=Synch   | 14.13     | 0.8                                          | 0.8                                          | 1.7                                          | 1.2     | 7.1E-01           |
| P36236    | 50S ribosomal protein L1 OS=Synchocystis sp. (strain PCC 6803 / Kaz       | 43.29     | 1.9                                          | 2.0                                          | 1.8                                          | 2.0     | 0.0E+00           |
| P23350    | 50S ribosomal protein L10 OS=Synchocystis sp. (strain PCC 6803 / Ka       | 22.54     | 1.5                                          | 2.0                                          | 2.1                                          | 1.9     | 6.8E-11           |
| P36237    | 50S ribosomal protein L11 OS=Synchocystis sp. (strain PCC 6803 / Ka       | 45.39     | 1.7                                          | 2.1                                          | 1.6                                          | 1.8     | 3.5E-13           |
| P73294    | 50S ribosomal protein L13 OS=Synchocystis sp. (strain PCC 6803 / Ka       | 78.81     | 3.3                                          | 8.1                                          | 6.2                                          | 5.9     | 2.1E-10           |
| P73310    | 50S ribosomal protein L14 OS=Synchocystis sp. (strain PCC 6803 / Ka       | 27.87     | 1.4                                          | 2.0                                          | 1.7                                          | 1.9     | 5.5E-02           |
| P73303    | 50S ribosomal protein L15 OS=Synchocystis sp. (strain PCC 6803 / Ka       | 67.35     | 5.1                                          | 6.5                                          | 6.7                                          | 6.1     | 2.1E-93           |
| P73313    | 50S ribosomal protein L16 OS=Synchocystis sp. (strain PCC 6803 / Ka       | 35.25     | 2.6                                          | 9.0                                          | 7.9                                          | 5.8     | 1.1E-02           |
| P73296    | 50S ribosomal protein L17 OS=Synchocystis sp. (strain PCC 6803 / Ka       | 52.59     | 4.6                                          | 14.5                                         | 6.9                                          | 9.0     | 2.6E-10           |
| P73305    | 50S ribosomal protein L18 OS=Synchocystis sp. (strain PCC 6803 / Ka       | 20        | 2.6                                          | 5.2                                          | 4.7                                          | 4.2     | 6.7E-11           |
| P36239    | 50S ribosomal protein L19 OS=Synchocystis sp. (strain PCC 6803 / Kaz      | 44.28     | 4.1                                          | 4.6                                          | 4.4                                          | 4.4     | 5.6E-49           |
| P73317    | 50S ribosomal protein L2 OS=Synchocystis sp. (strain PCC 6803 / Kaz       | 61.89     | 7.0                                          | 11.9                                         | 7.1                                          | 8.7     | 6.9E-34           |
| P48957    | 50S ribosomal protein L20 OS=Synchocystis sp. (strain PCC 6803 / Ka       | 57.26     | 2.2                                          | 5.5                                          | 4.1                                          | 3.9     | 1.1E-06           |
| P74286    | 50S ribosomal protein L21 OS=Synchocystis sp. (strain PCC 6803 / Ka       | 69.35     | 2.8                                          | 4.3                                          | 3.5                                          | 3.5     | 6.6E-22           |
| P73315    | 50S ribosomal protein L22 OS=Synchocystis sp. (strain PCC 6803 / Ka       | 43.38     | 3.2                                          | 4.3                                          | 5.1                                          | 4.1     | 4.1E-04           |
| P73318    | 50S ribosomal protein L23 OS=Synchocystis sp. (strain PCC 6803 / Ka       | 78.22     | 3.8                                          | 11.7                                         | 5.4                                          | 7.0     | 3.3E-08           |
| P73309    | 50S ribosomal protein L24 OS=Synchocystis sp. (strain PCC 6803 / Ka       | 68.7      | 2.2                                          | 11.2                                         | 11.3                                         | 8.2     | 6.5E-04           |
| P73289    | 50S ribosomal protein L25 OS=Synchocystis sp. (strain PCC 6803 / Ka       | 66.31     | 3.2                                          | 12.7                                         | 3.7                                          | 6.3     | 1.3E-04           |
| P74287    | 50S ribosomal protein L27 OS=Synchocystis sp. (strain PCC 6803 / Ka       | 59.77     | 4.7                                          | 12.2                                         | 8.1                                          | 8.5     | 2.0E-13           |
| P72851    | 50S ribosomal protein L28 OS=Synchocystis sp. (strain PCC 6803 / Ka       | 61.54     | 3.2                                          | 6.4                                          | 4.3                                          | 4.3     | 0.0E+00           |
| P73312    | 50S ribosomal protein L29 OS=Synchocystis sp. (strain PCC 6803 / Ka       | 73.97     | 0.9                                          | 3.4                                          | 2.8                                          | 2.4     | 6.7E-02           |
| P73320    | 50S ribosomal protein L3 OS=Synchocystis sp. (strain PCC 6803 / Kaz       | 52.58     | 7.4                                          | 35.6                                         | 4.3                                          | 15.8    | 2.2E-04           |
| P48958    | 50S ribosomal protein L33 OS=Synchocystis sp. (strain PCC 6803 / Ka       | 26.15     |                                              |                                              | 4.3                                          | 4.3     | 2.0E+00           |
| P48959    | 50S ribosomal protein L35 OS=Synchocystis sp. (strain PCC 6803 / Ka       | 32.28     | 2.2                                          | 6.0                                          | 3.8                                          | 4.4     | 1.0E-35           |
| P73319    | 50S ribosomal protein L4 OS=Synchocystis sp. (strain PCC 6803 / Kaz       | 55.71     | 4.5                                          | 19.4                                         | 4.0                                          | 9.3     | 1.2E-04           |
| P73308    | 50S ribosomal protein L5 OS=Synchocystis sp. (strain PCC 6803 / Kaz       | 65.56     | 2.4                                          | 1.7                                          | 1.3                                          | 1.8     | 9.5E-04           |
| P73306    | 50S ribosomal protein L6 OS=Synchocystis sp. (strain PCC 6803 / Kaz       | 77.65     | 5.4                                          | 8.4                                          | 9.5                                          | 7.8     | 6.2E-33           |
| P23349    | 50S ribosomal protein L7/L12 OS=Synchocystis sp. (strain PCC 6803 /       | 52.34     | 0.9                                          | 2.5                                          | 2.7                                          | 1.7     | 1.6E-01           |
| P42352    | 50S ribosomal protein L9 OS=Synchocystis sp. (strain PCC 6803 / Kaz       | 61.18     | 4.9                                          | 10.3                                         | 6.6                                          | 7.3     | 3.9E-20           |
| Q55798    | 6-carboxy-5,6,7,8-tetrahydropterin synthase OS=Synchocystis sp. (stra     | 23.26     | 0.7                                          | 2.5                                          | 2.3                                          | 1.8     | 2.2E-01           |
| Q55988    | 6-phosphofructokinase 2 OS=Synchocystis sp. (strain PCC 6803 / Kaz        | 5.99      | 0.7                                          | 0.7                                          | 0.5                                          | 0.7     | 2.0E+00           |
| Q52208    | 6-phosphogluconate dehydrogenase, decarboxylating OS=Synchocystis         | 24.9      | 1.1                                          | 0.5                                          | 0.3                                          | 0.6     | 8.8E-02           |
| P74618    | 6-phosphogluconate dehydrogenase OS=Synchocystis sp. (strain PCC 6803 / K | 15.42     | 0.5                                          | 0.5                                          | 0.1                                          | 0.5     | 0.0E+00           |
| P73527    | 6,7-dimethyl-8-ribityllumazine synthase OS=Synchocystis sp. (strain PC    | 23.27     | 0.9                                          | 2.2                                          | 2.2                                          | 2.3     | 1.5E-01           |
| Q05972    | 60 kDa chaperonin 1 OS=Synchocystis sp. (strain PCC 6803 / Kazusa)        | 58.96     | 0.8                                          | 0.9                                          | 0.8                                          | 0.8     | 2.6E-04           |
| P22034    | 60 kDa chaperonin 2 OS=Synchocystis sp. (strain PCC 6803 / Kazusa)        | 62.5      | 1.0                                          | 1.0                                          | 1.0                                          | 1.0     | 5.4E-02           |
| Q46363    | Acetazolamide conferring resistance protein zam OS=Synchocystis sp.       | 6.65      |                                              |                                              | 0.8                                          | 0.8     | 4.4E-01           |
| P73913    | Acetylglucosyl acid synthase OS=Synchocystis sp. (strain PCC 6803 / K     | 7.54      | 2.2                                          | 3.5                                          | 0.9                                          | 1.9     | 6.1E-01           |
| P73918    | Acetolactate synthase OS=Synchocystis sp. (strain PCC 6803 / Kazusa)      | 13.09     | 1.0                                          | 1.0                                          | 1.0                                          | 1.0     | 8.7E-05           |
| Q55141    | Acetolactate synthase small subunit OS=Synchocystis sp. (strain PCC       | 49.42     | 0.9                                          | 1.6                                          | 1.3                                          | 1.3     | 2.3E-01           |
| P73825    | Acetyl coenzyme A acetyltransferase (Thiolase) OS=Synchocystis sp. (      | 7.33      |                                              |                                              | 0.4                                          | 0.4     | 2.0E+00           |
| Q55404    | Acetyl coenzyme A synthetase OS=Synchocystis sp. (strain PCC 6803 /       | 10.41     | 3.2                                          | 2.1                                          | 1.2                                          | 1.2     | 2.1E-01           |
| P73326    | Acetylglutamate kinase OS=Synchocystis sp. (strain PCC 6803 / Kazusa      | 8.75      | 1.0                                          | 1.0                                          | 1.0                                          | 1.0     | 2.0E+00           |
| P73133    | Acetylmethionine aminotransferase OS=Synchocystis sp. (strain PCC 68      | 41.03     | 0.4                                          | 0.7                                          | 0.6                                          | 0.5     | 2.4E-05           |
| P74582    | Aconitate hydratase 2 OS=Synchocystis sp. (strain PCC 6803 / Kazusa)      | 11.29     | 0.7                                          | 1.1                                          | 1.0                                          | 0.8     | 1.7E-01           |
| P20804    | AcyI carrier protein OS=Synchocystis sp. (strain PCC 6803 / Kazusa) G     | 20.78     | 0.7                                          | 1.5                                          | 1.4                                          | 1.2     | 7.0E-01           |
| Q57446    | AcyI carrier protein-LTP-N-acetylglycosamine O-acetyltransferase          | 8.9       |                                              |                                              | 0.8                                          | 0.8     | 2.0E-02           |
| P74008    | Adenosylhomocysteinase OS=Synchocystis sp. (strain PCC 6803 / Kaz         | 57.65     | 0.6                                          | 0.5                                          | 0.3                                          | 0.5     | 3.0E-04           |
| P73302    | Adenylylate kinase 1 OS=Synchocystis sp. (strain PCC 6803 / Kazusa) C     | 44.32     | 0.8                                          | 1.8                                          | 1.4                                          | 1.4     | 3.2E-01           |
| P74394    | Adenylylsuccinate lyase OS=Synchocystis sp. (strain PCC 6803 / Kazuz      | 32.02     | 1.3                                          | 2.1                                          | 1.7                                          | 1.7     | 8.7E-04           |
| P73290    | Adenylylsuccinate lyase OS=Synchocystis sp. (strain PCC 6803 / Kaz        | 12.16     | 1.6                                          | 1.6                                          | 1.6                                          | 2.1     | 7.5E-04           |
| P72703    | Agmatinase 1 OS=Synchocystis sp. (strain PCC 6803 / Kazusa) GN=ag         | 15.36     | 0.8                                          | 3.0                                          | 1.9                                          | 1.9     | 1.9E-01           |
| P73288    | Aklaviketone reductase OS=Synchocystis sp. (strain PCC 6803 / Kazuz       | 8.57      | 1.0                                          | 0.8                                          | 0.9                                          | 0.9     | 4.5E-01           |
| P74423    | Alanine-tRNA ligase OS=Synchocystis sp. (strain PCC 6803 / Kazusa)        | 4.56      | 0.6                                          | 1.1                                          | 0.8                                          | 0.8     | 4.0E-01           |
| Q55688    | Aldehyde decarboxylase OS=Synchocystis sp. (strain PCC 6803 / Kazuz       | 12.55     |                                              |                                              | 1.8                                          | 1.8     | 2.0E+00           |
| Q55811    | Aldehyde dehydrogenase OS=Synchocystis sp. (strain PCC 6803 / Kaz         | 6.29      | 1.7                                          | 1.7                                          | 1.7                                          | 1.7     | 2.0E+00           |
| P74308    | Aldehyde reductase OS=Synchocystis sp. (strain PCC 6803 / Kazusa) I       | 18.35     |                                              | 1.4                                          | 0.9                                          | 1.3     | 2.4E-01           |
| P72939    | Alkaline phosphatase OS=Synchocystis sp. (strain PCC 6803 / Kazusa        | 11.36     | 0.1                                          | 0.2                                          | 0.3                                          | 0.2     | 6.1E-06           |
| Q01951    | Allophycocyanin alpha chain OS=Synchocystis sp. (strain PCC 6803 /        | 77.02     | 0.5                                          | 0.9                                          | 1.0                                          | 0.8     | 2.0E-01           |
| Q01952    | Allophycocyanin beta chain OS=Synchocystis sp. (strain PCC 6803 / K       | 99.76     | 0.6                                          | 0.9                                          | 0.8                                          | 0.8     | 6.6E-02           |
| P72870    | Allophycocyanin subunit alpha-B OS=Synchocystis sp. (strain PCC 68        | 73.81     | 0.6                                          | 1.0                                          | 1.0                                          | 0.8     | 2.7E-01           |
| P74551    | Allophycocyanin subunit beta-18 OS=Synchocystis sp. (strain PCC 680       | 68.05     | 0.6                                          | 1.0                                          | 1.1                                          | 0.9     | 5.3E-01           |
| Q55621    | Amidophosphoribosyltransferase OS=Synchocystis sp. (strain PCC 68         | 12.12     | 2.0                                          | 1.4                                          | 1.4                                          | 1.7     | 7.5E-03           |
| P74527    | Aminopeptidase OS=Synchocystis sp. (strain PCC 6803 / Kazusa) GN=         | 3.34      | 3.1                                          |                                              | 0.6                                          | 0.9     | 6.9E-01           |
| P74468    | Aminopeptidase F OS=Synchocystis sp. (strain PCC 6803 / Kazusa) G         | 18.82     | 0.8                                          | 2.1                                          | 1.5                                          | 1.5     | 2.9E-01           |
| P73607    | Anti-sigma factor antagonist OS=Synchocystis sp. (strain PCC 6803 / K     | 19.27     | 0.3                                          | 0.8                                          | 0.8                                          | 0.6     | 6.8E-02           |
| P73609    | Anti-sigma factor antagonist OS=Synchocystis sp. (strain PCC 6803 / K     | 45.37     | 0.3                                          | 0.6                                          | 0.5                                          | 0.5     | 1.3E-04           |
| P26287    | Apocytochrome f OS=Synchocystis sp. (strain PCC 6803 / Kazusa) GN         | 44.21     | 0.7                                          | 1.7                                          | 1.5                                          | 1.3     | 5.5E-01           |
| Q55841    | Arabinoxylan oxidase OS=Synchocystis sp. (strain PCC 6803 / Kazusa)       | 10.73     |                                              |                                              | 0.9                                          | 0.9     | 2.0E+00           |
| P74122    | Arginine biosynthesis bifunctional protein ArgI                           |           |                                              |                                              |                                              |         |                   |

|        |                                                                          |       |     |     |     |     |          |
|--------|--------------------------------------------------------------------------|-------|-----|-----|-----|-----|----------|
| P73437 | ATP-dependent zinc metalloprotease Fish4 OS=Synecocystis sp. (stra       | 17.83 | 2.2 | 1.1 | 1.2 | 1.5 | 9.1E-02  |
| P72719 | Bacterioferritin comigratory protein OS=Synecocystis sp. (strain PCC 6   | 15.22 | 1.1 | 1.1 |     | 1.1 | 1.8E-177 |
| P24602 | Bacterioferritin OS=Synecocystis sp. (strain PCC 6803 / Kazusa) GN=H     | 65.38 | 3.5 | 2.1 | 2.1 | 2.2 | 1.1E-01  |
| P73267 | Bacterioferritin OS=Synecocystis sp. (strain PCC 6803 / Kazusa) GN=H     | 36.36 | 0.7 | 3.2 | 2.6 | 2.1 | 2.6E-01  |
| Q55460 | Bicarbonate-binding protein CmpA OS=Synecocystis sp. (strain PCC 6       | 49.34 | 1.7 | 6.5 | 2.2 | 3.5 | 7.2E-03  |
| Q55074 | Bifunctional pantote ligase/cytidylyl kinase OS=Synecocystis sp. (str    | 4.48  | 1.3 |     |     | 1.3 | 2.0E+00  |
| Q55526 | Bifunctional protein FliA OS=Synecocystis sp. (strain PCC 6803 / Kazu    | 17.01 | 1.1 |     |     | 1.5 | 4.7E-01  |
| Q55758 | Bifunctional protein P9R OS=Synecocystis sp. (strain PCC 6803 / Kazu     | 28.21 | 0.7 | 0.7 | 0.6 | 0.7 | 1.8E-03  |
| P74741 | Bifunctional purine biosynthesis protein PurH OS=Synecocystis sp. (str   | 11.15 | 1.8 |     | 0.7 | 1.1 | 8.4E-01  |
| P74576 | Biosynthetic arginine decarboxylase 1 OS=Synecocystis sp. (strain PCC    | 4.03  | 1.9 |     | 0.4 | 1.1 | 8.3E-01  |
| P72567 | Biosynthetic arginine decarboxylase 2 OS=Synecocystis sp. (strain PCC    | 2.43  | 3.2 |     |     | 3.2 | 2.0E+00  |
| Q55120 | Biotin carrier protein of acetyl-CoA carboxylase OS=Synecocystis sp. (   | 14.29 | 1.1 |     |     | 1.4 | 3.5E-01  |
| Q55160 | Biotin carboxylase OS=Synecocystis sp. (strain PCC 6803 / Kazusa) G      | 6.47  | 3.0 |     |     | 0.9 | 2.9E-01  |
| Q54715 | C-phycocyanin alpha chain OS=Synecocystis sp. (strain PCC 6803 / Ka      | 79.01 | 0.5 |     | 0.9 | 0.8 | 1.6E-01  |
| Q54714 | C-phycocyanin beta chain OS=Synecocystis sp. (strain PCC 6803 / Ka       | 96.51 | 0.8 |     | 0.8 | 0.7 | 8.4E-02  |
| P73589 | C4-dicarboxylase binding protein OS=Synecocystis sp. (strain PCC 680     | 9.76  | 0.6 |     | 0.3 | 0.5 | 1.7E-02  |
| Q55756 | Carbamoyl-phosphate lyase small chain OS=Synecocystis sp. (strain P      | 10.67 | 1.6 |     |     | 0.5 | 5.6E-01  |
| P74587 | Carbamoyl-phosphate synthase small chain OS=Synecocystis sp. (stra       | 4.17  | 1.0 |     |     | 1.0 | 2.0E+00  |
| P72759 | Carbon dioxide concentrating mechanism protein CcmL OS=Synecocyst        | 18    | 1.9 |     | 1.9 | 1.9 | 2.0E+00  |
| P72758 | Carbon dioxide concentrating mechanism protein CcmM OS=Synecocyst        | 26.35 | 2.0 |     | 1.1 | 1.5 | 4.2E-02  |
| P72760 | Carbon dioxide concentrating mechanism protein CcmK homolog 1 OS=        | 73.87 | 1.0 |     | 3.6 | 3.5 | 6.6E-02  |
| P72761 | Carbon dioxide concentrating mechanism protein CcmK homolog 2 OS=        | 75.73 | 1.0 |     | 5.7 | 3.3 | 6.0E-02  |
| P73407 | Carbon dioxide concentrating mechanism protein CcmK homolog 4 OS=        | 23.21 | 0.6 |     | 1.6 | 1.1 | 9.8E-01  |
| Q54735 | Carbonic anhydrase OS=Synecocystis sp. (strain PCC 6803 / Kazusa)        | 16.06 | 1.8 |     | 1.4 | 2.1 | 2.1E-04  |
| P73458 | Carboxyl-terminal protease OS=Synecocystis sp. (strain PCC 6803 / Kaz    | 22.7  | 0.7 |     | 2.3 | 1.7 | 3.0E-01  |
| P72896 | Carotene formation protein OS=Synecocystis sp. (strain PCC 6803 / Kaz    | 37.02 | 0.7 |     | 0.9 | 1.7 | 7.5E-02  |
| P73911 | Catalase-peroxidase OS=Synecocystis sp. (strain PCC 6803 / Kazusa)       | 25.6  | 0.6 |     | 1.7 | 2.5 | 4.3E-01  |
| Q55584 | Cation or drug efflux system protein OS=Synecocystis sp. (strain PCC t   | 3.79  | 1.9 |     | 0.6 | 0.7 | 1.1E-01  |
| Q55589 | Cell division cycle protein OS=Synecocystis sp. (strain PCC 6803 / Kaz   | 7.19  | 2.0 |     | 1.0 | 1.3 | 5.2E-01  |
| P73456 | Cell division protein FtsZ OS=Synecocystis sp. (strain PCC 6803 / Kaz    | 7.67  | 0.9 |     |     | 0.9 | 4.5E-01  |
| P74459 | Chaperone protein ClpB 1 OS=Synecocystis sp. (strain PCC 6803 / Kaz      | 4.68  | 1.5 |     |     | 1.5 | 2.0E+00  |
| P74361 | Chaperone protein ClpB 2 OS=Synecocystis sp. (strain PCC 6803 / Kaz      | 14.68 | 1.7 |     |     | 0.7 | 8.2E-01  |
| Q55505 | Chaperone protein DnaJ 1 OS=Synecocystis sp. (strain PCC 6803 / Kaz      | 5.84  |     |     | 0.9 | 1.2 | 2.0E+00  |
| P72358 | Chaperone protein dnaK2 OS=Synecocystis sp. (strain PCC 6803 / Kaz       | 41.04 | 1.2 |     | 1.0 | 1.0 | 8.3E-01  |
| P73096 | Chaperone protein dnaK3 OS=Synecocystis sp. (strain PCC 6803 / Kaz       | 9.24  | 0.5 |     | 0.5 | 0.7 | 7.0E-01  |
| P73243 | CheY subfamily OS=Synecocystis sp. (strain PCC 6803 / Kazusa) GN=        | 69.44 | 0.8 |     | 0.8 | 0.8 | 0.0E+00  |
| P23353 | Chromatase synthase OS=Synecocystis sp. (strain PCC 6803 / Kazusa)       | 12.71 | 0.8 |     | 0.8 | 1.0 | 7.0E-01  |
| P73092 | Chromophore lyase Cpcps/CpeS 2 OS=Synecocystis sp. (strain PCC 68        | 8.33  | 1.2 |     |     | 1.2 | 2.0E+00  |
| P74371 | Chromophore lyase CpcTC/CpeT OS=Synecocystis sp. (strain PCC 680         | 21.98 | 1.6 |     | 1.3 | 1.3 | 1.8E-01  |
| P74645 | Circadian clock protein KaiB OS=Synecocystis sp. (strain PCC 6803 / K    | 21.9  | 0.7 |     | 0.5 | 0.6 | 8.4E-04  |
| Q59977 | Citrulline synthase OS=Synecocystis sp. (strain PCC 6803 / Kazusa) GN=   | 10.33 | 0.8 |     |     | 0.8 | 2.0E+00  |
| Q55822 | CobW protein OS=Synecocystis sp. (strain PCC 6803 / Kazusa) GN=α         | 6.53  |     |     | 1.3 | 1.4 | 2.0E+00  |
| Q55367 | Cyanate hydratase OS=Synecocystis sp. (strain PCC 6803 / Kazusa) C       | 36.91 | 0.6 |     | 1.6 | 1.2 | 7.8E-01  |
| P73833 | Cyanidin synthase OS=Synecocystis sp. (strain PCC 6803 / Kazusa) G       | 10.70 | 2.0 |     | 0.9 | 1.0 | 4.6E-01  |
| P73832 | Cyanophycinase OS=Synecocystis sp. (strain PCC 6803 / Kazusa) GN         | 8.49  | 1.6 |     | 1.5 | 1.5 | 2.4E-09  |
| P73410 | Cysteine synthase OS=Synecocystis sp. (strain PCC 6803 / Kazusa) G       | 16.03 | 0.7 |     | 1.6 | 1.2 | 7.8E-01  |
| P72662 | Cysteine synthase OS=Synecocystis sp. (strain PCC 6803 / Kazusa) G       | 24.62 | 0.9 |     | 1.3 | 0.4 | 4.3E-01  |
| P09190 | Cytochrome b559 subunit OS=Synecocystis sp. (strain PCC 6803 / Kaz       | 32.1  | 0.7 |     | 1.1 | 0.9 | 4.4E-01  |
| Q57038 | Cytochrome b6 OS=Synecocystis sp. (strain PCC 6803 / Kazusa) GN=         | 18.92 | 1.7 |     | 0.8 | 0.9 | 8.5E-01  |
| P26290 | Cytochrome b6-f complex iron-sulfur subunit 2 OS=Synecocystis sp. (s     | 28.89 | 0.6 |     | 0.8 | 0.7 | 3.4E-01  |
| P27589 | Cytochrome b6-f complex subunit 4 OS=Synecocystis sp. (strain PCC t      | 17.5  | 1.6 |     | 0.9 | 1.3 | 4.9E-01  |
| Q55013 | Cytochrome c-550 OS=Synecocystis sp. (strain PCC 6803 / Kazusa) G        | 46.25 | 0.7 |     | 1.7 | 1.6 | 5.2E-01  |
| P73468 | Cytoskeletal membrane protein for maltose uptake OS=Synecocystis sp      | 7.41  | 0.7 |     | 0.6 | 1.7 | 2.0E+00  |
| P73821 | D-3-phosphoglycerate dehydrogenase OS=Synecocystis sp. (strain PC        | 20.04 | 2.1 |     | 1.6 | 1.1 | 9.5E-01  |
| P73632 | D-alanine-D-alanine ligase OS=Synecocystis sp. (strain PCC 6803 / K      | 9.32  | 1.9 |     | 1.5 | 1.5 | 2.0E+00  |
| P74474 | D-alanyl-D-alanine carboxypeptidase OS=Synecocystis sp. (strain PCC      | 14.25 | 0.4 |     | 0.7 | 0.7 | 5.2E-02  |
| P73922 | D-1,6-bisphosphogluconate lyase 1.7 subunit OS=Synecocystis sp. (str     | 43.7  | 0.8 |     | 1.2 | 0.9 | 1.2E-01  |
| P74275 | Delta-1-pyrroline-5-carboxylate dehydrogenase OS=Synecocystis sp. (i     | 7.37  | 3.4 |     | 0.6 | 0.7 | 1.6E-01  |
| P77969 | Delta-aminolevulinic acid dehydratase OS=Synecocystis sp. (strain PC     | 48.62 | 0.7 |     | 1.8 | 1.4 | 5.8E-01  |
| P73618 | Deoxyribose-phosphate aldolase OS=Synecocystis sp. (strain PCC 680       | 10.22 | 1.0 |     | 2.7 | 1.9 | 3.1E-01  |
| Q55484 | Diaminopimelate decarboxylase OS=Synecocystis sp. (strain PCC 680        | 22.39 | 2.1 |     | 1.2 | 1.6 | 6.9E-03  |
| P74607 | Diaminopimelate epimerase OS=Synecocystis sp. (strain PCC 6803 / K       | 17.7  | 0.7 |     | 1.2 | 1.7 | 6.5E-02  |
| Q55393 | Diflavon flavoprotein A 1 OS=Synecocystis sp. (strain PCC 6803 / Kazu    | 12.57 | 0.9 |     | 0.4 | 0.6 | 2.5E-02  |
| P74510 | Dihydroipoamide acetyltransferase component (E2) of pyruvate dehydrc     | 33.95 | 1.2 |     | 0.8 | 0.7 | 3.4E-01  |
| P72740 | Dihydrolipoyl dehydrogenase OS=Synecocystis sp. (strain PCC 6803 /       | 64.35 | 1.2 |     | 4.3 | 3.5 | 3.0E-02  |
| P74438 | Dihydroxy-acid dehydrogenase OS=Synecocystis sp. (strain PCC 6803 / K    | 15.25 | 1.5 |     | 1.5 | 1.3 | 7.4E-01  |
| P74689 | Dihydroxy-acid dehydratase OS=Synecocystis sp. (strain PCC 6803 / K      | 32.44 | 0.9 |     | 3.9 | 2.1 | 2.3E-01  |
| Q55738 | DNA gyrase subunit A OS=Synecocystis sp. (strain PCC 6803 / Kazusa)      | 15    | 1.3 |     | 1.4 | 1.2 | 2.6E-03  |
| P77966 | DNA gyrase subunit B OS=Synecocystis sp. (strain PCC 6803 / Kazusa)      | 6.68  | 2.8 |     | 0.8 | 0.9 | 5.4E-01  |
| P73196 | DNA ligase OS=Synecocystis sp. (strain PCC 6803 / Kazusa) GN=Hij P       | 26.33 | 1.6 |     | 1.5 | 2.2 | 1.5E-05  |
| P72856 | DNA polymerase II subunit beta OS=Synecocystis sp. (strain PCC 680       | 8.95  | 0.8 |     | 0.8 | 0.8 | 2.0E+00  |
| P73810 | DNA topoisomerase 1 OS=Synecocystis sp. (strain PCC 6803 / Kazusa)       | 10.36 | 1.5 |     | 1.0 | 1.1 | 7.6E-01  |
| P73418 | DNA-binding protein HU OS=Synecocystis sp. (strain PCC 6803 / Kazu       | 60    | 0.6 |     | 1.1 | 1.2 | 7.9E-01  |
| P73297 | DNA-directed RNA polymerase subunit alpha OS=Synecocystis sp. (str       | 24.52 | 1.0 |     | 1.0 | 1.0 | 8.4E-01  |
| P77965 | DNA-directed RNA polymerase subunit beta OS=Synecocystis sp. (stra       | 10.51 | 1.4 |     | 0.9 | 1.4 | 5.5E-01  |
| P73334 | DNA-directed RNA polymerase subunit beta' OS=Synecocystis sp. (str       | 10.17 | 2.0 |     | 0.9 | 0.8 | 6.3E-01  |
| P74177 | DNA-directed RNA polymerase subunit gamma OS=Synecocystis sp. (i         | 14.38 | 2.3 |     | 0.9 | 1.1 | 3.4E-01  |
| P74352 | DNA-directed RNA polymerase subunit omega OS=Synecocystis sp. (s         | 22.37 |     |     | 1.3 | 1.3 | 2.0E+00  |
| P74036 | DTDP-glucose 4-6-dehydratase OS=Synecocystis sp. (strain PCC 680         | 7.93  |     |     | 0.5 | 0.6 | 0.0E+00  |
| P74751 | Elongation factor 1 OS=Synecocystis sp. (strain PCC 6803 / Kazusa)       | 11.07 | 3.0 |     | 1.0 | 1.0 | 0.6E-01  |
| P28371 | Elongation factor G 1 OS=Synecocystis sp. (strain PCC 6803 / Kazusa)     | 24.32 | 1.0 |     | 0.6 | 0.5 | 1.0E-01  |
| P74228 | Elongation factor G 2 OS=Synecocystis sp. (strain PCC 6803 / Kazusa)     | 10.56 | 2.7 |     | 1.0 | 1.1 | 2.6E-01  |
| Q55421 | Elongation factor G-like protein OS=Synecocystis sp. (strain PCC 6803    | 3.29  | 2.3 |     | 0.7 | 1.1 | 5.8E-01  |
| Q55119 | Elongation factor P OS=Synecocystis sp. (strain PCC 6803 / Kazusa) G     | 37.97 | 0.5 |     | 1.6 | 1.6 | 1.1E-01  |
| P74070 | Elongation factor Tc OS=Synecocystis sp. (strain PCC 6803 / Kazusa) t    | 59.63 | 1.6 |     | 1.6 | 1.5 | 2.5E-28  |
| P74227 | Elongation factor Tu OS=Synecocystis sp. (strain PCC 6803 / Kazusa)      | 77.44 | 1.7 |     | 1.2 | 1.4 | 1.8E-04  |
| P77972 | Enolase OS=Synecocystis sp. (strain PCC 6803 / Kazusa) GN=eno PE         | 41.67 | 0.5 |     | 2.0 | 1.3 | 8.3E-01  |
| P73016 | Enoyl-acyl-carrier-protein reductase [NADH] FabI OS=Synecocystis sp      | 13.95 | 3.4 |     | 1.3 | 1.8 | 3.0E-01  |
| P73114 | Enterobactin synthase OS=Synecocystis sp. (strain PCC 6803 / Kazusa) GN= | 4.95  | 0.8 |     | 0.5 | 0.5 | 2.9E+00  |
| P72938 | Extracellular nuclease OS=Synecocystis sp. (strain PCC 6803 / Kazusa)    | 6.55  | 0.0 |     | 0.1 | 0.1 | 4.8E-11  |
| P73732 | Extracellular solute-binding protein OS=Synecocystis sp. (strain PCC 6   | 10.48 | 0.5 |     | 1.1 | 1.1 | 0.9E-01  |
| P73355 | Ferredoxin component OS=Synecocystis sp. (strain PCC 6803 / Kazusa)      | 31.1  | 0.9 |     | 1.0 | 1.4 | 7.1E-01  |
| P74447 | Ferredoxin OS=Synecocystis sp. (strain PCC 6803 / Kazusa) GN=FdD1        | 10.75 | 1.4 |     | 1.0 | 1.2 | 4.1E-01  |
| Q55318 | Ferredoxin-NADP reductase OS=Synecocystis sp. (strain PCC 6803 /         | 43.34 | 1.1 |     | 1.2 | 1.5 | 7.6E-03  |
| Q55366 | Ferredoxin-nitrite reductase OS=Synecocystis sp. (strain PCC 6803 / K    | 14.14 | 2.3 |     | 0.7 | 0.8 | 7.5E-01  |
| P72730 | Ferredoxin-1 OS=Synecocystis sp. (strain PCC 6803 / Kazusa) GN=pe        | 17.53 | 0.6 |     | 1.4 | 1.1 | 9.7E-01  |
| P55037 | Ferredoxin-dependent glutamate synthase 1 OS=Synecocystis sp. (str       | 7.29  | 0.7 |     | 0.7 | 0.7 | 0.0E+00  |
| P55038 | Ferredoxin-dependent glutamate synthase 2 OS=Synecocystis sp. (str       | 19.73 | 1.6 |     | 0.6 | 1.0 | 7.7E-01  |
| Q55389 | Ferredoxin-thioredoxin reductase, catalytic chain OS=Synecocystis sp.    | 19.49 |     |     | 1.4 |     | 2.0E+00  |
| P73050 | Ferripyochelin binding protein OS=Synecocystis sp. (strain PCC 6803 /    | 13.16 |     |     |     | 0.7 | 2.0E+00  |
| P73719 | Flavodoxin OS=Synecocystis sp. (strain PCC 6803 / Kazusa) GN=FlbI 1      | 11.18 | 0.2 |     | 0.4 | 0.2 | 8.9E-05  |
| P74324 | Fructose-6-phosphate aldolase OS=Synecocystis sp. (strain PCC 6803 / Kaz | 6.76  |     |     | 0.9 | 1.0 | 2.0E+00  |
| P74309 | Fructose-bisphosphate aldolase class 1 OS=Synecocystis sp. (strain PC    | 7.33  |     |     | 0.1 | 0.9 | 8.5E-01  |
| Q55684 | Fructose-bisphosphate aldolase class 2 OS=Synecocystis sp. (strain P     | 38.44 | 0.4 |     | 0.5 | 0.6 | 2.3E-04  |
| P72585 | GDP-L-fucose synthase OS=Synecocystis sp. (strain PCC 6803 / Kazu        | 15.71 | 1.5 |     | 1.0 | 0.9 | 1.1E-01  |
| P72596 | GDP-mannose 4,6-dehydratase OS=Synecocystis sp. (strain PCC 680          | 29.56 | 1.5 |     | 1.1 | 1.1 | 4.4E-01  |
| P74189 | General secretion pathway protein D OS=Synecocystis sp. (strain PCC      | 4.3   | 0.4 |     | 0.9 | 0.9 | 2.0E+00  |
| Q55155 | General secretion pathway protein E OS=Synecocystis sp. (strain PCC      | 4.76  |     |     |     | 0.9 | 2.0E+00  |
| Q55799 | General secretion pathway protein E OS=Synecocystis sp. (strain PCC      | 4.43  | 3.3 |     | 1.1 | 0.8 | 3.4E-01  |
| P73704 | General secretion pathway protein G OS=Synecocystis sp. (strain PCC      | 25.6  | 0.6 |     | 0.5 | 0.7 | 2.7E-08  |
| Q55087 | Geranylgeranyl diphosphate reductase OS=Synecocystis sp. (strain PCC     | 27.03 | 1.7 |     | 1.6 | 0.9 | 1.1E-01  |
| P72683 | Geranylgeranyl pyrophosphate synthase OS=Synecocystis sp. (strain F      | 7.62  |     |     | 0.6 | 1.1 | 4.8E-01  |
| P33779 | Global nitrogen regulator OS=Synecocystis sp. (strain PCC 6803 / Kaz     | 24.44 | 0.6 |     | 0.4 | 0.8 | 3.1E-01  |
| P52415 | Glucose-1-phosphate adenylyltransferase OS=Synecocystis sp. (strain P    | 29.84 | 1.9 |     | 0.5 | 0.5 | 6.2E-01  |
| P73411 | Glucose-6-phosphate 1,6-dehydrogenase OS=Synecocystis sp. (strain P      | 22    | 1.7 |     | 0.5 | 0.6 | 5.1E-01  |
| P52983 | Glucose-6-phosphate isomerase OS=Synecocystis sp. (strain PCC 680        | 47.27 | 0.8 |     | 2.7 | 2.0 | 1.5E-01  |
| P73043 | Glutamate decarboxylase OS=Synecocystis sp. (strain PCC 6803 / Kaz       | 8.35  | 2.8 |     | 0.9 | 0.9 | 5.0E-01  |
| P77970 | Glutamate--ammonia ligase OS=Synecocystis sp. (strain PCC 6803 / K       | 9.94  | 3.2 |     | 0.8 | 0.8 | 5.4E-01  |
| Q55778 | Glutamate--tRNA ligase OS=Synecocystis sp. (strain PCC 6803 / Kazu       | 10.14 | 0.8 |     | 0.9 | 0.9 | 6.6E-02  |
| Q55685 | Glutamate-1-semialdehyde 2,1-aminomutase OS=Synecocystis sp. (str        | 33.72 | 1.7 |     | 2.2 | 2.9 | 2.6E-03  |
| P77961 | Glutamine synthetase OS=Synecocystis sp. (strain PCC 6803 / Kazusa       | 51.8  | 0.9 |     | 3.9 | 2.3 | 1.1E-01  |
| P72720 | Glutamine--fructose-6-phosphate aminotransferase [isomerizing] OS=Sy     | 11.89 | 0.7 |     | 0.7 | 1.4 | 8.9E-01  |
| P28463 | Glutamyl-tRNA reductase OS=Synecocystis sp. (strain PCC 6803 / Kaz       | 4.92  | 2.5 |     | 0.4 | 0.6 | 6.6E-01  |
| Q55139 | Glutathione S-transferase OS=Synecocystis sp. (strain PCC 6803 / Kaz     | 19.02 | 1.0 |     | 0.6 | 0.7 | 7.4E-02  |
| P73493 | Glycerate-3-phosphate dehydrogenase OS=Synecocystis sp. (strain PC       | 9.69  | 1.3 |     | 0.8 | 0.8 | 2.0E+00  |
| P49433 | Glycerate-3-phosphate dehydrogenase 1 OS=Synecocystis sp. (i             | 19.76 | 0.8 |     | 0.7 | 0.7 | 2.2E-06  |
| P80055 | Glycerate-3-phosphate dehydrogenase 2 OS=Synecocystis sp. (i             | 64.99 | 2.5 |     | 1.7 | 1.8 | 5.6E-08  |
| P74416 | Glycine dehydrogenase (decarboxylating) OS=Synecocystis sp. (strain      | 6.51  | 0.4 |     | 0.5 | 0.5 | 5.4E-04  |
| Q55716 | Glycine tRNA ligase subunit OS=Synecocystis sp. (strain PCC 6            | 10.37 | 1.0 |     | 0.8 | 0.8 | 0.0E+00  |
| Q55690 | Glycine--tRNA ligase beta subunit OS=Synecocystis sp. (strain PCC 68     | 10.39 | 2.1 |     | 0.6 | 0.6 | 1.1E-01  |
| P72691 | Glycogen operon protein GlgX OS=Synecocystis sp. (strain PCC 6803        | 25.34 | 1.6 |     |     |     |          |

|        |                                                                                                                        |       |     |     |     |         |         |
|--------|------------------------------------------------------------------------------------------------------------------------|-------|-----|-----|-----|---------|---------|
| P74250 | Hydroperoxy fatty acid reductase gpX1 OS=Synecocystis sp. (strain PCC 6803 / Kazusa)                                   | 16,57 | 0,3 | 0,5 | 0,5 | 0,4     | 5,5E-05 |
| P73824 | Hydroperoxy fatty acid reductase gpX2 OS=Synecocystis sp. (strain PCC 6803 / Kazusa)                                   | 31,82 | 0,4 | 1,3 | 1,0 | 0,9     | 5,0E-01 |
| Q55552 | IMP dehydrogenase OS=Synecocystis sp. (strain PCC 6803 / Kazusa)                                                       | 20,65 | 0,2 | 0,7 | 1,0 | 0,8     | 2,1E-02 |
| P73853 | IMP dehydrogenase subunit OS=Synecocystis sp. (strain PCC 6803 / Kazusa)                                               | 40,31 | 1,2 | 0,8 | 1,0 | 1,0     | 6,2E-01 |
| Q55508 | Indole-3-glycerol phosphate synthase OS=Synecocystis sp. (strain PCC 6803 / Kazusa)                                    | 9,49  | 0,8 | 0,8 | 1,0 | 0,9     | 1,3E-01 |
| P80507 | Inorganic pyrophosphatase OS=Synecocystis sp. (strain PCC 6803 / Kazusa)                                               | 55,03 | 0,5 | 1,8 | 1,5 | 1,3     | 7,9E-01 |
| Q55274 | Iron stress-inducible hcp1-binding protein OS=Synecocystis sp. (strain PCC 6803 / Kazusa)                              | 2,34  | 0,2 | 0,1 | 0,1 | 0,1     | 2,0E-02 |
| P72827 | Iron uptake protein A1 OS=Synecocystis sp. (strain PCC 6803 / Kazusa)                                                  | 39,44 | 0,2 | 0,3 | 0,3 | 0,3     | 0,0E+00 |
| Q55835 | Iron uptake protein A2 OS=Synecocystis sp. (strain PCC 6803 / Kazusa)                                                  | 31,5  | 0,2 | 1,1 | 1,3 | 0,9     | 4,8E-01 |
| P80046 | Isocitrate dehydrogenase [NADP+] OS=Synecocystis sp. (strain PCC 6803 / Kazusa)                                        | 27,58 | 0,3 | 1,0 | 1,3 | 0,9     | 4,7E-01 |
| P73679 | Isopenicillin N epimerase OS=Synecocystis sp. (strain PCC 6803 / Kazusa)                                               | 34,91 | 0,6 | 2,2 | 1,6 | 1,4     | 5,8E-01 |
| P74287 | Isopectinate dehydrogenase OS=Synecocystis sp. (strain PCC 6803 / Kazusa)                                              | 4,58  | 0,2 | 0,2 | 0,2 | 0,2     | 2,0E-00 |
| P29107 | Ketol-acid reductoisomerase OS=Synecocystis sp. (strain PCC 6803 / Kazusa)                                             | 34,74 | 1,5 | 0,8 | 0,8 | 1,1     | 9,5E-01 |
| P73553 | Large-conductance mechanosensitive channel OS=Synecocystis sp. (strain PCC 6803 / Kazusa)                              | 14,48 | 1,2 | 0,8 | 1,0 | 1,0     | 9,5E-01 |
| P73274 | Leucine-tRNA ligase OS=Synecocystis sp. (strain PCC 6803 / Kazusa)                                                     | 4,03  | 2,7 | 0,7 | 0,7 | 1,4     | 8,2E-01 |
| Q55967 | Light-dependent prochlorophyllide reductase OS=Synecocystis sp. (strain PCC 6803 / Kazusa)                             | 30,12 | 2,1 | 0,6 | 0,6 | 1,1     | 8,7E-01 |
| P74518 | Light-stress-induced protein A homolog OS=Synecocystis sp. (strain PCC 6803 / Kazusa)                                  | 55,5  | 1,3 | 2,0 | 1,7 | 2,0     | 4,0E-00 |
| Q57310 | Lipid-A-disaccharide synthase OS=Synecocystis sp. (strain PCC 6803 / Kazusa)                                           | 8,63  | 1,9 | 0,5 | 0,6 | 0,9     | 2,0E+00 |
| Q55828 | LL-diaminopimelate aminotransferase OS=Synecocystis sp. (strain PCC 6803 / Kazusa)                                     | 24,03 | 1,5 | 0,5 | 0,6 | 0,9     | 4,1E-01 |
| Q55687 | Long-chain acyl-l-acyl-carrier-protein [reductase] OS=Synecocystis sp. (strain PCC 6803 / Kazusa)                      | 7,06  | 1,2 | 1,2 | 1,2 | 1,2     | 2,0E+00 |
| P73004 | Long-chain fatty-acid CoA ligase OS=Synecocystis sp. (strain PCC 6803 / Kazusa)                                        | 5,89  | 0,7 | 0,6 | 0,6 | 0,6     | 1,9E-04 |
| P73443 | Lysine-tRNA ligase OS=Synecocystis sp. (strain PCC 6803 / Kazusa)                                                      | 4,9   | 2,2 | 2,2 | 2,2 | 2,2     | 2,0E+00 |
| P72772 | Magnesium-chelate subunit ChlD OS=Synecocystis sp. (strain PCC 6803 / Kazusa)                                          | 3,25  | 2,4 | 2,4 | 2,4 | 2,4     | 2,0E+00 |
| P51634 | Magnesium-chelate subunit ChlI OS=Synecocystis sp. (strain PCC 6803 / Kazusa)                                          | 15,41 | 1,7 | 1,2 | 1,4 | 1,4     | 1,4E-03 |
| P72584 | Magnesium-protoporphyrin IX monomethyl ester [oxidative] cyclase 1 OS=Synecocystis sp. (strain PCC 6803 / Kazusa)      | 18,99 | 1,6 | 0,8 | 1,1 | 1,1     | 9,0E-01 |
| Q55833 | Maltose dehydrogenase OS=Synecocystis sp. (strain PCC 6803 / Kazusa)                                                   | 5,56  | 0,3 | 0,5 | 0,5 | 0,8     | 0,1E-01 |
| P73377 | Mannose-6-phosphate isomerase OS=Synecocystis sp. (strain PCC 6803 / Kazusa)                                           | 18,6  | 0,7 | 0,7 | 0,7 | 0,7     | 2,0E+00 |
| P74155 | Membrane protein insertase YidC OS=Synecocystis sp. (strain PCC 6803 / Kazusa)                                         | 5,21  | 1,7 | 0,6 | 0,6 | 1,1     | 9,5E-01 |
| P74186 | Membrane protein OS=Synecocystis sp. (strain PCC 6803 / Kazusa)                                                        | 19,07 | 0,7 | 0,7 | 0,8 | 0,7     | 3,2E-09 |
| P73954 | Membrane-associated protein sirt1513 OS=Synecocystis sp. (strain PCC 6803 / Kazusa)                                    | 48,18 | 2,0 | 3,4 | 4,4 | 3,3     | 3,7E-07 |
| Q55729 | Methionine-tRNA ligase OS=Synecocystis sp. (strain PCC 6803 / Kazusa)                                                  | 3,2   | 0,3 | 0,3 | 0,3 | 0,3     | 2,0E+00 |
| Q55444 | Methyl-accepting chemotaxis protein II OS=Synecocystis sp. (strain PCC 6803 / Kazusa)                                  | 11,04 | 0,9 | 1,7 | 1,7 | 1,3     | 5,4E-01 |
| P73008 | Methyl-accepting chemotaxis protein OS=Synecocystis sp. (strain PCC 6803 / Kazusa)                                     | 8,52  | 1,5 | 0,6 | 0,7 | 0,9     | 5,7E-01 |
| P72802 | Mitochondrial outer membrane F2K protein OS=Synecocystis sp. (strain PCC 6803 / Kazusa)                                | 10,15 | 0,7 | 1,5 | 1,7 | 1,2     | 8,6E-01 |
| P74344 | Molybdopterin biosynthesis MoxB protein OS=Synecocystis sp. (strain PCC 6803 / Kazusa)                                 | 29,32 | 1,4 | 1,5 | 1,2 | 1,6     | 1,3E-02 |
| P74395 | N utilization substrate protein B homolog OS=Synecocystis sp. (strain PCC 6803 / Kazusa)                               | 24,89 | 1,3 | 1,5 | 1,0 | 1,2     | 8,6E-02 |
| P54899 | N-acetyl-gamma-glutamyl-phosphate reductase OS=Synecocystis sp. (strain PCC 6803 / Kazusa)                             | 14,81 | 1,1 | 0,4 | 0,6 | 0,7     | 1,2E-01 |
| P73736 | N-acetylmuramoyl-L-alanine amidase OS=Synecocystis sp. (strain PCC 6803 / Kazusa)                                      | 5,86  | 0,7 | 1,3 | 1,9 | 1,3     | 4,4E-01 |
| Q55498 | NS-carboxyaminoacyl-tRNA synthetase OS=Synecocystis sp. (strain PCC 6803 / Kazusa)                                     | 17,61 | 8,3 | 1,0 | 0,7 | 0,7     | 2,0E+00 |
| P26522 | NAD(P)H-quinone oxidoreductase subunit 1 OS=Synecocystis sp. (strain PCC 6803 / Kazusa)                                | 10,75 | 2,3 | 0,8 | 0,8 | 1,3     | 6,7E-01 |
| P27724 | NAD(P)H-quinone oxidoreductase subunit H OS=Synecocystis sp. (strain PCC 6803 / Kazusa)                                | 23,1  | 2,5 | 1,2 | 1,2 | 1,5     | 3,8E-01 |
| P26525 | NAD(P)H-quinone oxidoreductase subunit I OS=Synecocystis sp. (strain PCC 6803 / Kazusa)                                | 50,78 | 1,4 | 1,4 | 1,0 | 1,2     | 5,3E-02 |
| P71925 | NAD(P)H-quinone oxidoreductase subunit J OS=Synecocystis sp. (strain PCC 6803 / Kazusa)                                | 23,46 | 0,9 | 1,4 | 1,4 | 1,0     | 5,7E-01 |
| P19050 | NAD(P)H-quinone oxidoreductase subunit K1 OS=Synecocystis sp. (strain PCC 6803 / Kazusa)                               | 23,73 | 1,1 | 0,9 | 1,0 | 1,0     | 4,6E-01 |
| P74338 | NAD(P)H-quinone oxidoreductase subunit M OS=Synecocystis sp. (strain PCC 6803 / Kazusa)                                | 23,97 | 1,4 | 1,1 | 1,4 | 1,0     | 6,1E-01 |
| P74771 | NAD(P)H-quinone oxidoreductase subunit O OS=Synecocystis sp. (strain PCC 6803 / Kazusa)                                | 40,28 | 0,8 | 1,0 | 0,8 | 0,8     | 6,7E-03 |
| P73735 | NADH dehydrogenase OS=Synecocystis sp. (strain PCC 6803 / Kazusa)                                                      | 4,95  | 0,6 | 1,1 | 1,1 | 0,7     | 2,0E+00 |
| P72762 | NADH-glutamate lyase subunit OS=Synecocystis sp. (strain PCC 6803 / Kazusa)                                            | 8,3   | 1,0 | 0,7 | 0,7 | 1,1     | 1,1E-01 |
| P54386 | NADP-specific glutamate dehydrogenase OS=Synecocystis sp. (strain PCC 6803 / Kazusa)                                   | 11,21 | 1,2 | 0,6 | 0,6 | 0,9     | 6,3E-01 |
| P72781 | NarL subfamily OS=Synecocystis sp. (strain PCC 6803 / Kazusa)                                                          | 13,48 | 2,2 | 2,2 | 1,3 | 1,8     | 4,0E-02 |
| P73104 | NarL subfamily OS=Synecocystis sp. (strain PCC 6803 / Kazusa)                                                          | 17,84 | 1,0 | 1,0 | 1,3 | 1,1     | 3,4E-01 |
| P74390 | Negative aliphatic amidase regulator OS=Synecocystis sp. (strain PCC 6803 / Kazusa)                                    | 41,48 | 4,3 | 2,6 | 2,7 | 2,1     | 2,1E-02 |
| P73757 | Negatively charged protein OS=Synecocystis sp. (strain PCC 6803 / Kazusa)                                              | 14,4  | 0,4 | 1,4 | 1,4 | 1,0     | 6,8E-01 |
| Q55602 | NiFS protein OS=Synecocystis sp. (strain PCC 6803 / Kazusa)                                                            | 26,68 | 1,0 | 1,5 | 1,3 | 1,2     | 7,6E-02 |
| P73448 | Nitrate reductase OS=Synecocystis sp. (strain PCC 6803 / Kazusa)                                                       | 4,76  | 1,0 | 1,1 | 1,4 | 1,4     | 3,6E-01 |
| P73450 | Nitrate transport ATP-binding protein NtrC OS=Synecocystis sp. (strain PCC 6803 / Kazusa)                              | 2,69  | 1,9 | 1,1 | 1,1 | 2,0E+00 |         |
| P73452 | Nitrate transport protein NtrA OS=Synecocystis sp. (strain PCC 6803 / Kazusa)                                          | 38,1  | 0,7 | 1,5 | 1,4 | 1,2     | 6,2E-01 |
| P73449 | Nitrate transport protein NtrD OS=Synecocystis sp. (strain PCC 6803 / Kazusa)                                          | 11,45 | 0,7 | 0,7 | 0,7 | 0,7     | 0,0E+00 |
| Q55247 | Nitrogen regulatory protein P-II OS=Synecocystis sp. (strain PCC 6803 / Kazusa)                                        | 70,54 | 0,5 | 0,8 | 0,8 | 0,7     | 2,0E-02 |
| Q6ZEQ0 | Non-heme chloroperoxidase OS=Synecocystis sp. (strain PCC 6803 / Kazusa)                                               | 31,02 | 0,7 | 1,9 | 1,5 | 1,4     | 5,1E-01 |
| P73057 | Nucleoid-associated protein sirt1847 OS=Synecocystis sp. (strain PCC 6803 / Kazusa)                                    | 23,68 | 0,7 | 1,7 | 1,4 | 1,3     | 4,7E-01 |
| P74494 | Nucleoside diphosphate kinase OS=Synecocystis sp. (strain PCC 6803 / Kazusa)                                           | 34,26 | 0,6 | 0,6 | 0,5 | 0,6     | 3,6E-02 |
| P74571 | Oligopeptidase A OS=Synecocystis sp. (strain PCC 6803 / Kazusa)                                                        | 6,45  | 1,2 | 0,7 | 2,3 | 1,4     | 5,6E-01 |
| P74314 | OmpR subfamily OS=Synecocystis sp. (strain PCC 6803 / Kazusa)                                                          | 18,8  | 0,9 | 0,9 | 0,9 | 0,9     | 2,0E+00 |
| P74102 | Orange carotenoid-binding protein OS=Synecocystis sp. (strain PCC 6803 / Kazusa)                                       | 51,74 | 1,5 | 0,7 | 0,5 | 0,9     | 5,0E-01 |
| Q55497 | Oxidoreductase OS=Synecocystis sp. (strain PCC 6803 / Kazusa)                                                          | 8,77  | 0,7 | 0,7 | 0,7 | 0,7     | 7,6E-01 |
| P72848 | Oxygen-dependent coproporphyrinogen-III oxidase OS=Synecocystis sp. (strain PCC 6803 / Kazusa)                         | 40,88 | 0,6 | 2,6 | 2,0 | 1,8     | 4,0E-01 |
| P74707 | Peptide chain release factor 1 OS=Synecocystis sp. (strain PCC 6803 / Kazusa)                                          | 8,22  | 0,9 | 1,0 | 1,1 | 1,0     | 7,7E-01 |
| P72622 | Peptide methionine sulfoxide reductase MsrA 1 OS=Synecocystis sp. (strain PCC 6803 / Kazusa)                           | 9,46  | 1,4 | 1,4 | 2,1 | 1,7     | 1,3E-02 |
| P73037 | Peptidyl-prolyl cis-trans isomerase OS=Synecocystis sp. (strain PCC 6803 / Kazusa)                                     | 17,91 | 0,6 | 1,9 | 1,8 | 1,4     | 5,4E-01 |
| P73789 | Peptidyl-prolyl cis-trans isomerase sirt1251 OS=Synecocystis sp. (strain PCC 6803 / Kazusa)                            | 9,7   | 0,6 | 0,7 | 1,0 | 1,0     | 2,0E+00 |
| Q55387 | Periplasmic binding protein of ABC transporter for natural amino acids OS=Synecocystis sp. (strain PCC 6803 / Kazusa)  | 19,38 | 0,8 | 1,3 | 1,3 | 1,1     | 6,0E-01 |
| Q55187 | Phenylalanine-tRNA ligase alpha subunit OS=Synecocystis sp. (strain PCC 6803 / Kazusa)                                 | 13,29 | 2,6 | 1,1 | 0,7 | 1,5     | 5,4E-01 |
| P74296 | Phenylalanine-tRNA ligase beta subunit OS=Synecocystis sp. (strain PCC 6803 / Kazusa)                                  | 8,4   | 2,0 | 1,1 | 0,7 | 1,1     | 9,9E-01 |
| Q55196 | Phosphate import ATP-binding protein PstB 1 OS=Synecocystis sp. (strain PCC 6803 / Kazusa)                             | 26,6  | 0,7 | 0,5 | 0,4 | 0,5     | 4,2E-03 |
| Q55198 | Phosphate transport system permease protein PstC OS=Synecocystis sp. (strain PCC 6803 / Kazusa)                        | 5,05  | 0,3 | 0,3 | 0,4 | 0,3     | 0,0E+00 |
| P73785 | Phosphate-binding protein OS=Synecocystis sp. (strain PCC 6803 / Kazusa)                                               | 54,35 | 0,4 | 0,1 | 0,2 | 0,2     | 2,9E-04 |
| Q55199 | Phosphate-binding protein OS=Synecocystis sp. (strain PCC 6803 / Kazusa)                                               | 31,33 | 0,5 | 0,5 | 0,8 | 0,6     | 1,2E-03 |
| P74259 | Phosphoenolpyruvate carboxylase OS=Synecocystis sp. (strain PCC 6803 / Kazusa)                                         | 9,96  | 1,0 | 1,0 | 0,8 | 1,0     | 9,7E-01 |
| Q55905 | Phosphoglycerate kinase OS=Synecocystis sp. (strain PCC 6803 / Kazusa)                                                 | 9,42  | 1,2 | 0,8 | 1,0 | 2,1     | 2,0E+00 |
| P74643 | Phosphoglucuronate kinase OS=Synecocystis sp. (strain PCC 6803 / Kazusa)                                               | 9,52  | 1,0 | 0,4 | 0,3 | 0,6     | 6,5E-02 |
| P74421 | Phosphoglycerate kinase OS=Synecocystis sp. (strain PCC 6803 / Kazusa)                                                 | 40,65 | 0,9 | 0,6 | 0,4 | 0,7     | 3,6E-02 |
| Q55894 | Phosphoglyoxalase OS=Synecocystis sp. (strain PCC 6803 / Kazusa)                                                       | 12,85 | 1,0 | 1,1 | 1,1 | 1,1     | 3,9E-07 |
| P74232 | Phosphoglutamate decarboxylase OS=Synecocystis sp. (strain PCC 6803 / Kazusa)                                          | 4,3   | 0,3 | 1,1 | 1,1 | 1,1     | 2,0E+00 |
| P73471 | Phosphoribosylaminimidazole-succinocarboxamide synthase OS=Synecocystis sp. (strain PCC 6803 / Kazusa)                 | 9,47  | 2,3 | 2,3 | 1,2 | 1,1     | 5,2E-03 |
| Q55843 | Phosphoribosylformylglycinamide synthase 1 OS=Synecocystis sp. (strain PCC 6803 / Kazusa)                              | 15,18 | 1,0 | 1,0 | 1,0 | 1,0     | 2,0E+00 |
| P72644 | Phosphoribosylformylglycinamide synthase 2 OS=Synecocystis sp. (strain PCC 6803 / Kazusa)                              | 4,3   | 0,3 | 1,0 | 1,0 | 1,0     | 2,0E+00 |
| P37101 | Phosphoribulokinase OS=Synecocystis sp. (strain PCC 6803 / Kazusa)                                                     | 43,98 | 1,2 | 0,7 | 0,7 | 0,8     | 2,6E-01 |
| P73546 | Phosphatase OS=Synecocystis sp. (strain PCC 6803 / Kazusa)                                                             | 12,10 | 1,7 | 0,4 | 0,7 | 0,4     | 5,9E-01 |
| P74063 | Photosystem I assembly protein Ycf3 OS=Synecocystis sp. (strain PCC 6803 / Kazusa)                                     | 14,45 | 1,0 | 1,0 | 1,0 | 1,0     | 2,0E+00 |
| P72705 | Photosystem I assembly protein Ycf4 OS=Synecocystis sp. (strain PCC 6803 / Kazusa)                                     | 10,64 | 0,6 | 0,8 | 0,8 | 0,8     | 2,0E+00 |
| P72966 | Photosystem I biogenesis protein BtpA OS=Synecocystis sp. (strain PCC 6803 / Kazusa)                                   | 16,38 | 0,8 | 0,9 | 1,3 | 1,3     | 2,0E+00 |
| P32422 | Photosystem I iron-sulfur center OS=Synecocystis sp. (strain PCC 6803 / Kazusa)                                        | 65,43 | 0,8 | 1,5 | 1,0 | 0,9     | 1,6E-01 |
| P29254 | Photosystem I P700 chlorophyll a apoprotein A1 OS=Synecocystis sp. (strain PCC 6803 / Kazusa)                          | 13,72 | 2,0 | 0,8 | 0,7 | 1,2     | 8,7E-01 |
| P29255 | Photosystem I P700 chlorophyll a apoprotein A2 OS=Synecocystis sp. (strain PCC 6803 / Kazusa)                          | 17,65 | 2,1 | 0,8 | 0,8 | 1,2     | 8,3E-01 |
| P19569 | Photosystem I reaction center subunit II OS=Synecocystis sp. (strain PCC 6803 / Kazusa)                                | 52,48 | 1,0 | 0,9 | 0,9 | 0,9     | 4,0E-02 |
| P29256 | Photosystem I reaction center subunit III OS=Synecocystis sp. (strain PCC 6803 / Kazusa)                               | 56,36 | 0,9 | 1,2 | 0,9 | 1,0     | 8,7E-01 |
| P12975 | Photosystem I reaction center subunit IV OS=Synecocystis sp. (strain PCC 6803 / Kazusa)                                | 41,89 | 0,9 | 0,9 | 0,9 | 0,9     | 2,0E-02 |
| P37277 | Photosystem I reaction center subunit XI OS=Synecocystis sp. (strain PCC 6803 / Kazusa)                                | 26,11 | 1,1 | 0,9 | 1,0 | 1,0     | 7,5E-01 |
| Q55332 | Photosystem II 12 kDa extrinsic protein OS=Synecocystis sp. (strain PCC 6803 / Kazusa)                                 | 25,19 | 0,5 | 0,5 | 0,5 | 0,5     | 2,0E+00 |
| P09193 | Photosystem II 44 kDa reaction center protein OS=Synecocystis sp. (strain PCC 6803 / Kazusa)                           | 17,17 | 2,0 | 0,7 | 0,7 | 1,1     | 8,8E-01 |
| P05429 | Photosystem II CP47 chlorophyll a apoprotein OS=Synecocystis sp. (strain PCC 6803 / Kazusa)                            | 22,05 | 0,8 | 0,8 | 0,8 | 1,0     | 8,2E-01 |
| P09192 | Photosystem II D2 protein OS=Synecocystis sp. (strain PCC 6803 / Kazusa)                                               | 10,8  | 1,4 | 0,5 | 0,5 | 0,7     | 4,4E-01 |
| P74367 | Photosystem II lipoprotein Psb27 OS=Synecocystis sp. (strain PCC 6803 / Kazusa)                                        | 35,82 | 0,7 | 1,1 | 1,1 | 1,0     | 6,5E-01 |
| P10549 | Photosystem II manganese-stabilizing polypeptide OS=Synecocystis sp. (strain PCC 6803 / Kazusa)                        | 27,01 | 0,5 | 0,5 | 1,2 | 1,2     | 0,8E-01 |
| Q55354 | Photosystem II reaction center protein L OS=Synecocystis sp. (strain PCC 6803 / Kazusa)                                | 33,33 | 0,8 | 1,2 | 1,2 | 1,2     | 2,0E+00 |
| Q55328 | Photosystem II reaction center Psb28 protein OS=Synecocystis sp. (strain PCC 6803 / Kazusa)                            | 16,01 | 0,7 | 1,4 | 1,4 | 1,4     | 2,0E+00 |
| P16033 | Photosystem (Q) protein 2 OS=Synecocystis sp. (strain PCC 6803 / Kazusa)                                               | 16,67 | 1,4 | 0,6 | 0,7 | 0,9     | 4,8E-01 |
| Q55544 | Phycobiliprotein ApcC OS=Synecocystis sp. (strain PCC 6803 / Kazusa)                                                   | 48,21 | 0,6 | 0,6 | 0,6 | 1,1     | 8,4E-01 |
| P73203 | Phycobilisome 32 kDa linker polypeptide, phycocyanin-associated, rod OS=Synecocystis sp. (strain PCC 6803 / Kazusa)    | 66,32 | 1,4 | 0,5 | 0,6 | 0,8     | 3,2E-01 |
| P73204 | Phycobilisome 32 kDa linker polypeptide, phycocyanin-associated, rod OS=Synecocystis sp. (strain PCC 6803 / Kazusa)    | 59,97 | 1,0 | 0,4 | 0,4 | 0,6     | 5,8E-02 |
| Q01950 | Phycobilisome 7.8 kDa linker polypeptide, allophycocyanin-associated, c OS=Synecocystis sp. (strain PCC 6803 / Kazusa) | 50,75 | 1,3 | 0,6 | 0,6 | 0,8     | 2,8E-01 |
| P73202 | Phycobilisome 8.9 kDa linker polypeptide, phycocyanin-associated, rod OS=Synecocystis sp. (strain PCC 6803 / Kazusa)   | 81,93 | 0,6 | 0,2 | 0,4 | 0,4     | 1,8E-04 |
| P73093 | Phycobilisome rod-core linker polypeptide CpcG OS=Synecocystis sp. (strain PCC 6803 / Kazusa)                          | 59,57 | 1,7 | 0,6 | 0,7 | 1,0     | 7,4E-01 |
| P74625 | Phycobilisome rod-core linker polypeptide CpcG OS=Synecocystis sp. (strain PCC 6803 / Kazusa)                          | 24,1  | 0,9 | 0,4 | 0,4 | 0,6     | 1,8E-02 |
| Q55891 | Phycocyanobilin ferredoxin oxidoreductase OS=Synecocystis sp. (strain PCC 6803 / Kazusa)                               | 8,06  | 1,0 | 0,7 | 0,7 | 0,7     | 2,0E+00 |
| Q55168 | Phytochrome-like protein cph1 OS=Synecocystis sp. (strain PCC 6803 / Kazusa)                                           | 4,81  | 2,5 | 0,5 | 0,5 | 0,8     | 1,3E-01 |
| P73173 | PII protein OS=Synecocystis sp. (strain PCC 6803 / Kazusa)                                                             | 9,55  | 1,0 | 0,5 | 0,6 | 0,7     | 9,9E-02 |
| P21697 | Plastocyanin OS=Synecocystis sp. (strain PCC 6803 / Kazusa)                                                            | 44,44 | 0,7 | 1,3 | 1,4 | 1,1     | 7,0E-01 |
| P73390 | Poly(3-hydroxyalkanoate) synthase OS=Synecocystis                                                                      |       |     |     |     |         |         |



|        |                                                                                      |       |     |     |     |     |         |
|--------|--------------------------------------------------------------------------------------|-------|-----|-----|-----|-----|---------|
| Q55660 | Sir0001 protein OS=Synecocystis sp. (strain PCC 6803 / Kazusa) GN=                   | 39,38 | 0,8 | 3,3 | 2,1 | 2,1 | 1,9E-01 |
| Q55667 | Sir0006 protein OS=Synecocystis sp. (strain PCC 6803 / Kazusa) GN=                   | 8,76  |     |     | 2,8 | 2,8 | 2,0E+00 |
| Q55449 | Sir0031 protein OS=Synecocystis sp. (strain PCC 6803 / Kazusa) GN=                   | 9,34  | 0,9 | 3,6 | 2,3 | 2,3 | 1,1E-01 |
| Q55131 | Sir0049 protein OS=Synecocystis sp. (strain PCC 6803 / Kazusa) GN=                   | 11,06 | 0,8 | 0,3 | 0,3 | 0,5 | 9,8E-03 |
| P74445 | Sir1046 protein OS=Synecocystis sp. (strain PCC 6803 / Kazusa) GN=                   | 12,94 | 1,2 |     |     | 1,2 | 2,0E+00 |
| P74446 | Sir1047 protein OS=Synecocystis sp. (strain PCC 6803 / Kazusa) GN=                   | 13,01 | 1,0 | 0,7 | 0,7 | 0,8 | 7,5E-02 |
| P74448 | Sir1048 protein OS=Synecocystis sp. (strain PCC 6803 / Kazusa) GN=                   | 30,51 | 0,8 | 1,1 | 1,1 | 1,1 | 3,8E-01 |
| P74450 | Sir1051 protein OS=Synecocystis sp. (strain PCC 6803 / Kazusa) GN=                   | 25,62 | 0,9 | 1,1 | 0,9 | 1,0 | 4,9E-01 |
| Q55573 | Sir1084 protein OS=Synecocystis sp. (strain PCC 6803 / Kazusa) GN=                   | 9,71  |     |     | 0,8 | 0,8 | 2,0E+00 |
| Q55780 | Sir1208 protein OS=Synecocystis sp. (strain PCC 6803 / Kazusa) GN=                   | 8,49  | 0,5 | 0,6 | 0,6 | 0,7 | 2,0E-02 |
| Q55782 | Sir1209 protein OS=Synecocystis sp. (strain PCC 6803 / Kazusa) GN=                   | 7,18  | 1,8 | 0,9 | 0,8 | 1,2 | 7,4E-01 |
| Q55698 | Sir1246 protein OS=Synecocystis sp. (strain PCC 6803 / Kazusa) GN=                   | 2,9   | 0,4 | 0,9 | 0,7 | 0,7 | 1,4E-01 |
| P72690 | Sir1236 protein OS=Synecocystis sp. (strain PCC 6803 / Kazusa) GN=                   | 7,21  |     |     | 1,4 | 1,4 | 2,0E+00 |
| P72700 | Sir1244 protein OS=Synecocystis sp. (strain PCC 6803 / Kazusa) GN=                   | 33,45 | 2,0 | 1,1 | 0,9 | 1,3 | 2,7E-01 |
| P72709 | Sir1250 protein OS=Synecocystis sp. (strain PCC 6803 / Kazusa) GN=                   | 14,61 | 0,4 |     |     | 0,4 | 2,0E+00 |
| P74396 | Sir1280 protein OS=Synecocystis sp. (strain PCC 6803 / Kazusa) GN=                   | 7,87  | 0,7 |     |     | 0,8 | 2,0E+00 |
| Q55922 | Sir1315 protein OS=Synecocystis sp. (strain PCC 6803 / Kazusa) GN=                   | 14,38 |     |     |     | 1,6 | 1,6E+00 |
| Q55541 | Sir1333 protein OS=Synecocystis sp. (strain PCC 6803 / Kazusa) GN=                   | 37,74 | 0,7 | 0,8 | 2,0 | 1,2 | 9,4E-01 |
| Q55542 | Sir1334 protein OS=Synecocystis sp. (strain PCC 6803 / Kazusa) GN=                   | 13,64 | 0,4 | 2,2 | 5,5 | 2,7 | 4,7E-01 |
| Q55650 | Sir1355 protein OS=Synecocystis sp. (strain PCC 6803 / Kazusa) GN=                   | 9,67  |     |     | 3,4 | 3,4 | 2,0E+00 |
| Q55737 | Sir1361 protein OS=Synecocystis sp. (strain PCC 6803 / Kazusa) GN=                   | 14,38 | 0,5 | 1,6 |     | 1,0 | 7,8E-01 |
| Q55113 | Sir1431 protein OS=Synecocystis sp. (strain PCC 6803 / Kazusa) GN=                   | 20,8  | 0,3 | 0,8 | 0,8 | 0,6 | 1,0E-01 |
| P74375 | Sir1442 protein OS=Synecocystis sp. (strain PCC 6803 / Kazusa) GN=                   | 12,77 | 0,8 | 0,8 | 1,1 | 0,9 | 3,6E-01 |
| P74379 | Sir1443 protein OS=Synecocystis sp. (strain PCC 6803 / Kazusa) GN=                   | 21,6  | 0,2 | 0,6 | 2,5 | 2,5 | 2,5E-03 |
| P74694 | Sir1455 protein OS=Synecocystis sp. (strain PCC 6803 / Kazusa) GN=                   | 19,15 | 0,2 |     | 0,0 | 0,0 | 2,0E+00 |
| Q55171 | Sir1476 protein OS=Synecocystis sp. (strain PCC 6803 / Kazusa) GN=                   | 27,98 | 0,5 | 0,4 | 0,2 | 0,7 | 1,3E-01 |
| Q55176 | Sir1483 protein OS=Synecocystis sp. (strain PCC 6803 / Kazusa) GN=                   | 25,5  | 0,8 | 0,8 | 0,9 | 0,8 | 3,8E-03 |
| Q55514 | Sir1552 protein OS=Synecocystis sp. (strain PCC 6803 / Kazusa) GN=                   | 27,87 | 1,0 | 0,7 | 0,6 | 0,7 | 2,9E-02 |
| Q55392 | Sir1565 protein OS=Synecocystis sp. (strain PCC 6803 / Kazusa) GN=                   | 3,69  |     |     | 1,0 | 1,0 | 2,0E+00 |
| P74746 | Sir1600 protein OS=Synecocystis sp. (strain PCC 6803 / Kazusa) GN=                   | 10,12 | 0,4 |     | 0,7 | 0,8 | 3,5E-01 |
| P74752 | Sir1605 protein OS=Synecocystis sp. (strain PCC 6803 / Kazusa) GN=                   | 10,03 | 2,3 | 0,6 | 1,5 | 1,5 | 7,5E-01 |
| P74753 | Sir1606 protein OS=Synecocystis sp. (strain PCC 6803 / Kazusa) GN=                   | 6,62  |     |     | 0,4 | 0,4 | 2,0E+00 |
| Q55727 | Sir1645 protein OS=Synecocystis sp. (strain PCC 6803 / Kazusa) GN=                   | 57,77 | 0,5 | 1,4 | 1,2 | 1,0 | 8,6E-01 |
| P74584 | Sir1667 protein OS=Synecocystis sp. (strain PCC 6803 / Kazusa) GN=                   | 7,51  |     |     | 0,5 | 0,5 | 2,0E+00 |
| P72937 | Sir1670 protein OS=Synecocystis sp. (strain PCC 6803 / Kazusa) GN=                   | 31,23 | 2,2 | 0,6 | 1,3 | 1,1 | 9,0E-01 |
| P72967 | Sir1695 protein OS=Synecocystis sp. (strain PCC 6803 / Kazusa) GN=                   | 21,97 | 1,0 |     | 1,1 | 1,0 | 4,7E-01 |
| Q55972 | Sir1708 protein OS=Synecocystis sp. (strain PCC 6803 / Kazusa) GN=                   | 10,2  |     | 0,4 | 0,4 | 0,4 | 0,0E+00 |
| P72675 | Sir1731 protein OS=Synecocystis sp. (strain PCC 6803 / Kazusa) GN=                   | 12,19 | 1,0 |     | 1,1 | 1,0 | 5,7E-01 |
| Q54206 | Sir1841 protein OS=Synecocystis sp. (strain PCC 6803 / Kazusa) GN=                   | 14,43 | 1,9 | 3,3 | 2,1 | 2,2 | 1,8E-02 |
| Q5436  | Sir1848 protein OS=Synecocystis sp. (strain PCC 6803 / Kazusa) GN=                   | 24,55 | 0,9 | 1,0 | 1,1 | 1,0 | 6,6E-01 |
| P73556 | Sir1876 protein OS=Synecocystis sp. (strain PCC 6803 / Kazusa) GN=                   | 7,58  | 0,6 | 0,6 | 1,1 | 0,6 | 2,0E+00 |
| Q55374 | Sir1907 protein OS=Synecocystis sp. (strain PCC 6803 / Kazusa) GN=                   | 4,93  | 3,6 | 0,7 | 0,7 | 1,6 | 7,9E-01 |
| Q55375 | Sir1908 protein OS=Synecocystis sp. (strain PCC 6803 / Kazusa) GN=                   | 5,33  |     |     | 0,5 | 0,5 | 2,0E+00 |
| Q55376 | Sir1912 protein OS=Synecocystis sp. (strain PCC 6803 / Kazusa) GN=                   | 8,14  | 1,6 | 1,6 | 0,8 | 1,7 | 8,0E-02 |
| Q55386 | Sir1924 protein OS=Synecocystis sp. (strain PCC 6803 / Kazusa) GN=                   | 14,34 | 0,9 | 2,0 | 1,4 | 1,4 | 2,5E-01 |
| Q55501 | Sir1929 protein OS=Synecocystis sp. (strain PCC 6803 / Kazusa) GN=                   | 15,9  | 1,7 | 0,7 | 1,0 | 1,0 | 8,7E-01 |
| P74302 | Sir1937 protein OS=Synecocystis sp. (strain PCC 6803 / Kazusa) GN=                   | 11,99 | 0,8 |     | 1,3 | 1,1 | 9,0E-01 |
| P72952 | Sir1941 protein OS=Synecocystis sp. (strain PCC 6803 / Kazusa) GN=                   | 5,66  | 0,9 |     |     | 1,1 | 2,0E+00 |
| P73007 | Sir1943 protein OS=Synecocystis sp. (strain PCC 6803 / Kazusa) GN=                   | 14,44 | 0,6 |     |     | 0,6 | 2,0E+00 |
| P72741 | Sir1997 protein OS=Synecocystis sp. (strain PCC 6803 / Kazusa) GN=                   | 26,38 | 0,9 | 0,9 | 1,0 | 0,9 | 1,0E-03 |
| P72747 | Sir1103 protein OS=Synecocystis sp. (strain PCC 6803 / Kazusa) GN=                   | 3,97  | 1,0 |     | 0,9 | 1,0 | 7,1E-01 |
| P74233 | Sir1160 protein OS=Synecocystis sp. (strain PCC 6803 / Kazusa) GN=                   | 40,2  | 0,3 | 1,7 | 1,5 | 1,2 | 8,7E-01 |
| P74236 | Sir1161 protein OS=Synecocystis sp. (strain PCC 6803 / Kazusa) GN=                   | 4,1   | 1,0 |     | 0,7 | 0,8 | 3,7E-01 |
| P74718 | Sir1189 protein OS=Synecocystis sp. (strain PCC 6803 / Kazusa) GN=                   | 8,55  |     |     | 0,9 | 0,9 | 2,0E+00 |
| P73342 | Sir1194 protein OS=Synecocystis sp. (strain PCC 6803 / Kazusa) GN=                   | 9,46  |     | 2,7 | 2,7 | 2,7 | 2,0E+00 |
| P73344 | Sir1196 protein OS=Synecocystis sp. (strain PCC 6803 / Kazusa) GN=                   | 3,96  | 0,3 |     |     | 0,3 | 2,0E+00 |
| P73463 | Sir1235 protein OS=Synecocystis sp. (strain PCC 6803 / Kazusa) GN=                   | 16,33 | 0,6 | 2,2 | 1,6 | 1,5 | 4,5E-01 |
| P73497 | Sir1240 protein OS=Synecocystis sp. (strain PCC 6803 / Kazusa) GN=                   | 14,53 |     |     | 1,5 | 1,5 | 2,0E+00 |
| P73803 | Sir1263 protein OS=Synecocystis sp. (strain PCC 6803 / Kazusa) GN=                   | 8,94  | 0,7 | 1,0 | 1,0 | 1,1 | 7,8E-01 |
| P74188 | Sir1276 protein OS=Synecocystis sp. (strain PCC 6803 / Kazusa) GN=                   | 13,45 | 0,8 | 1,6 | 1,6 | 1,3 | 3,6E-01 |
| P72839 | Sir1301 protein OS=Synecocystis sp. (strain PCC 6803 / Kazusa) GN=                   | 19,63 | 0,5 | 1,2 | 1,1 | 0,9 | 6,1E-01 |
| P74074 | Sir1338 protein OS=Synecocystis sp. (strain PCC 6803 / Kazusa) GN=                   | 12,12 | 1,4 | 1,4 | 1,5 | 1,3 | 5,8E-02 |
| P74079 | Sir1342 protein OS=Synecocystis sp. (strain PCC 6803 / Kazusa) GN=                   | 18,43 | 1,9 |     | 1,1 | 1,5 | 1,6E-01 |
| P73592 | Sir1406 protein OS=Synecocystis sp. (strain PCC 6803 / Kazusa) GN=                   | 13,26 | 0,4 |     | 1,1 | 0,4 | 2,0E+00 |
| P73503 | Sir1437 protein OS=Synecocystis sp. (strain PCC 6803 / Kazusa) GN=                   | 32,14 | 0,9 |     | 1,3 | 1,0 | 5,1E-01 |
| P73508 | Sir1440 protein OS=Synecocystis sp. (strain PCC 6803 / Kazusa) GN=                   | 16,78 | 1,2 |     | 1,5 | 1,5 | 2,0E+00 |
| P74154 | Sir1470 protein OS=Synecocystis sp. (strain PCC 6803 / Kazusa) GN=                   | 12,21 |     |     | 0,7 | 0,7 | 2,0E+00 |
| P73946 | Sir1506 protein OS=Synecocystis sp. (strain PCC 6803 / Kazusa) GN=                   | 13,02 | 0,9 | 0,5 | 0,9 | 0,8 | 9,5E-02 |
| P73953 | Sir1512 protein OS=Synecocystis sp. (strain PCC 6803 / Kazusa) GN=                   | 7,22  |     |     | 0,7 | 0,7 | 2,0E+00 |
| P74219 | Sir1533 protein OS=Synecocystis sp. (strain PCC 6803 / Kazusa) GN=                   | 25,57 | 1,1 | 1,3 | 1,3 | 1,2 | 8,6E-03 |
| P7424  | Sir1540 protein OS=Synecocystis sp. (strain PCC 6803 / Kazusa) GN=                   | 28,3  | 0,6 | 2,5 | 0,6 | 1,2 | 3,6E-01 |
| P74588 | Sir1557 protein OS=Synecocystis sp. (strain PCC 6803 / Kazusa) GN=                   | 7,59  | 1,5 | 2,2 | 1,0 | 1,5 | 1,2E-01 |
| P72968 | Sir1590 protein OS=Synecocystis sp. (strain PCC 6803 / Kazusa) GN=                   | 10,51 | 2,1 |     | 0,8 | 1,5 | 6,2E-01 |
| P72985 | Sir1600 protein OS=Synecocystis sp. (strain PCC 6803 / Kazusa) GN=                   | 24,83 |     | 0,5 | 0,8 | 0,7 | 6,5E-02 |
| P72991 | Sir1601 protein OS=Synecocystis sp. (strain PCC 6803 / Kazusa) GN=                   | 12,75 | 0,6 |     | 1,5 | 1,0 | 8,7E-01 |
| P72895 | Sir1617 protein OS=Synecocystis sp. (strain PCC 6803 / Kazusa) GN=                   | 8,52  | 2,4 |     | 1,7 | 1,6 | 6,7E-01 |
| P72897 | Sir1619 protein OS=Synecocystis sp. (strain PCC 6803 / Kazusa) GN=                   | 7,23  | 1,2 |     | 1,1 | 1,2 | 7,8E-02 |
| P74673 | Sir1668 protein OS=Synecocystis sp. (strain PCC 6803 / Kazusa) GN=                   | 9,29  |     |     | 1,2 | 1,2 | 2,0E+00 |
| P73716 | Sir1732 protein OS=Synecocystis sp. (strain PCC 6803 / Kazusa) GN=                   | 12,75 |     |     | 1,2 | 1,2 | 2,0E+00 |
| P73949 | Sir1768 protein OS=Synecocystis sp. (strain PCC 6803 / Kazusa) GN=                   | 4,7   | 1,0 | 1,0 | 1,0 | 1,0 | 2,0E+00 |
| P72765 | Sir1772 protein OS=Synecocystis sp. (strain PCC 6803 / Kazusa) GN=                   | 7,16  |     | 1,7 | 1,7 | 1,7 | 2,0E+00 |
| P72799 | Sir1794 protein OS=Synecocystis sp. (strain PCC 6803 / Kazusa) GN=                   | 11,6  | 1,7 | 0,7 | 0,6 | 1,0 | 8,2E-01 |
| P72814 | Sir1800 protein OS=Synecocystis sp. (strain PCC 6803 / Kazusa) GN=                   | 8,17  | 0,6 | 1,5 | 1,8 | 1,0 | 6,4E-01 |
| P73697 | Sir1801 protein OS=Synecocystis sp. (strain PCC 6803 / Kazusa) GN=                   | 12,03 | 0,8 |     | 1,3 | 1,1 | 8,5E-01 |
| P73698 | Sir1813 protein OS=Synecocystis sp. (strain PCC 6803 / Kazusa) GN=                   | 9,15  |     |     | 0,8 | 1,3 | 2,0E+00 |
| P73699 | Sir1814 protein OS=Synecocystis sp. (strain PCC 6803 / Kazusa) GN=                   | 12,34 | 0,7 |     |     | 0,7 | 2,0E+00 |
| P73706 | Sir1818 protein OS=Synecocystis sp. (strain PCC 6803 / Kazusa) GN=                   | 8,46  |     | 0,9 |     | 0,9 | 2,0E+00 |
| P73389 | Sir1829 protein OS=Synecocystis sp. (strain PCC 6803 / Kazusa) GN=                   | 5,76  |     |     | 0,3 | 0,3 | 2,0E+00 |
| P73409 | Sir1841 protein OS=Synecocystis sp. (strain PCC 6803 / Kazusa) GN=                   | 17,78 | 1,4 | 0,4 | 1,7 | 1,0 | 8,3E-01 |
| P73603 | Sir1852 protein OS=Synecocystis sp. (strain PCC 6803 / Kazusa) GN=                   | 52,66 | 0,2 | 0,8 | 0,7 | 0,6 | 1,1E-01 |
| P73604 | Sir1853 protein OS=Synecocystis sp. (strain PCC 6803 / Kazusa) GN=                   | 20,35 | 0,2 | 0,4 | 0,5 | 0,4 | 2,3E-03 |
| P73605 | Sir1854 protein OS=Synecocystis sp. (strain PCC 6803 / Kazusa) GN=                   | 51,52 | 0,2 | 0,5 | 0,4 | 0,4 | 2,3E-03 |
| P73606 | Sir1855 protein OS=Synecocystis sp. (strain PCC 6803 / Kazusa) GN=                   | 48,93 | 0,2 | 0,9 | 1,6 | 0,6 | 1,6E-01 |
| P73328 | Sir1900 protein OS=Synecocystis sp. (strain PCC 6803 / Kazusa) GN=                   | 22,67 | 0,8 | 2,0 | 2,0 | 1,8 | 1,8E-01 |
| P73103 | Sir1908 protein OS=Synecocystis sp. (strain PCC 6803 / Kazusa) GN=                   | 19,12 | 1,0 | 0,2 | 0,6 | 0,6 | 1,2E-01 |
| P74473 | Sir1923 protein OS=Synecocystis sp. (strain PCC 6803 / Kazusa) GN=                   | 4,02  | 0,9 |     | 0,9 | 0,9 | 2,0E+00 |
| P74478 | Sir1926 protein OS=Synecocystis sp. (strain PCC 6803 / Kazusa) GN=                   | 14,35 | 0,7 |     | 0,8 | 0,8 | 1,8E-04 |
| P74500 | Sir1940 protein OS=Synecocystis sp. (strain PCC 6803 / Kazusa) GN=                   | 19,23 | 1,6 |     | 1,5 | 1,8 | 5,9E-01 |
| P74506 | Sir1944 protein OS=Synecocystis sp. (strain PCC 6803 / Kazusa) GN=                   | 6,69  | 0,4 | 0,2 | 0,6 | 0,4 | 6,3E-04 |
| P74094 | Sir1958 protein OS=Synecocystis sp. (strain PCC 6803 / Kazusa) GN=                   | 17    |     | 1,4 | 1,1 | 1,3 | 2,8E-02 |
| P74100 | Sir1962 protein OS=Synecocystis sp. (strain PCC 6803 / Kazusa) GN=                   | 5,14  |     | 1,2 | 1,4 | 1,3 | 3,4E-04 |
| P74113 | Sir1971 protein OS=Synecocystis sp. (strain PCC 6803 / Kazusa) GN=                   | 20,23 | 0,6 |     | 1,5 | 1,0 | 8,7E-01 |
| P73222 | Sir2005 protein OS=Synecocystis sp. (strain PCC 6803 / Kazusa) GN=                   | 13,03 | 0,5 | 0,7 | 0,6 | 0,6 | 5,3E-04 |
| P73244 | Sir2025 protein OS=Synecocystis sp. (strain PCC 6803 / Kazusa) GN=                   | 25,49 | 0,5 | 2,0 | 2,2 | 1,6 | 5,3E-01 |
| P73812 | Sir2060 protein OS=Synecocystis sp. (strain PCC 6803 / Kazusa) GN=                   | 4,09  | 2,7 | 0,5 | 0,5 | 1,3 | 8,7E-01 |
| P73370 | Sir2070 protein OS=Synecocystis sp. (strain PCC 6803 / Kazusa) GN=                   | 15,14 | 1,4 | 0,7 | 0,6 | 0,9 | 4,7E-01 |
| P73934 | Sir2106 protein OS=Synecocystis sp. (strain PCC 6803 / Kazusa) GN=                   | 9,31  | 0,7 |     | 1,1 | 1,1 | 2,0E+00 |
| P73681 | Sir2144 protein OS=Synecocystis sp. (strain PCC 6803 / Kazusa) GN=                   | 9,63  | 0,6 | 1,9 | 1,9 | 1,3 | 8,6E-01 |
| Q6ZEP2 | Sir5088 protein OS=Synecocystis sp. (strain PCC 6803 / Kazusa) GN=                   | 16,81 | 0,5 |     |     | 0,5 | 2,0E+00 |
| Q6YRQB | Sir1696 protein OS=Synecocystis sp. (strain PCC 6803 / Kazusa) GN=                   | 5,36  |     |     | 1,1 | 1,1 | 2,0E+00 |
| Q6ZEB6 | Sir1702 protein OS=Synecocystis sp. (strain PCC 6803 / Kazusa) GN=                   | 23,1  | 0,8 | 2,1 | 1,8 | 1,5 | 2,6E-01 |
| Q6ZEC5 | Sir1703 protein OS=Synecocystis sp. (strain PCC 6803 / Kazusa) GN=                   | 19,3  |     | 0,7 | 0,7 | 0,7 | 2,0E+00 |
| P74281 | Soluble hydrogenase 42 kD subunit OS=Synecocystis sp. (strain PCC 6803 / Kazusa) GN= | 44,79 | 3,9 |     | 1,6 | 2,2 | 1,6E-01 |
| P73722 | SOS function regulatory protein OS=Synecocystis sp. (strain PCC 6803 / Kazusa) GN=   | 50,25 | 0,4 |     | 1,0 | 0,4 | 0,0E+00 |
| P73914 | Squalene-hopene-cyclase OS=Synecocystis sp. (strain PCC 6803 / Kazusa) GN=           | 10,36 | 0,5 | 0,5 | 0,4 | 0,6 | 2,8E-02 |
| P74735 | Ssl0352 protein OS=Synecocystis sp. (strain PCC 6803 / Kazusa) GN=                   | 39,21 |     |     | 1,6 | 1,6 | 2,0E+00 |
| P73875 | Ssl0467 protein OS=Synecocystis sp. (strain PCC 6803 / Kazusa) GN=                   | 30,99 |     |     | 0,7 | 0,7 | 2,0E+00 |
| P74067 | Ssl1498 protein OS=Synecocystis sp. (strain PCC 6803 / Kazusa) GN=                   | 24,59 |     |     | 2,4 | 2,4 | 2,0E+00 |
| P73031 | Ssl1918 protein OS=Synecocystis sp. (strain PCC 6803 / Kazusa) GN=                   | 18,56 | 0,5 |     |     | 0,5 | 2,0E+00 |
| P74239 | Ssl2148 protein OS=Synecocystis sp. (strain PCC 6803 / Kazusa) GN=                   | 16,33 |     | 1,5 | 1,4 | 1,5 | 1,1E-20 |
| P73489 | Ssl2245 protein OS=Synecocystis sp. (strain PCC 6803 / Kazusa) GN=                   | 15,91 | 0,3 | 0,6 | 0,4 | 0,4 | 2,8E-06 |
| P73654 | Ssl3364 protein OS=Synecocystis sp. (strain PCC 6803 / Kazusa) GN=                   | 27,03 | 0,3 | 0,8 | 0,9 | 0,7 | 1,3E-01 |
| P73286 | Ssl3451 protein OS=Synecocystis sp. (strain PCC 6803 / Kazusa) GN=                   | 22,22 | 1,3 |     | 2,1 | 1,3 | 2,0E+00 |
| P74769 | Ssr1528 protein OS=Synecocystis sp. (strain PCC 6803 / Kazusa) GN=                   | 47,87 | 1,0 | 1,9 | 1,1 | 1,7 | 4,7E-0  |



|        |                                                                        |       |     |  |     |     |     |         |
|--------|------------------------------------------------------------------------|-------|-----|--|-----|-----|-----|---------|
| Q59992 | Tryptophan synthase beta chain OS=Synecocystis sp. (strain PCC 680     | 17.48 | 1.4 |  | 1.2 | 1.0 | 1.2 | 1.3E-01 |
| P73655 | Tryptophan-tRNA ligase OS=Synecocystis sp. (strain PCC 6803 / Kazu     | 6.53  | 0.6 |  |     |     | 0.6 | 2.0E+00 |
| P74463 | Twitching motility protein OS=Synecocystis sp. (strain PCC 6803 / Kazu | 21.95 | 1.3 |  |     | 0.7 | 1.0 | 9.4E-01 |
| Q55673 | UDP-N-acetylglucosamine 1-carboxyvinyltransferase OS=Synecocystis      | 5.94  | 0.6 |  | 1.9 | 1.2 | 1.2 | 7.4E-01 |
| Q55469 | UDP-N-acetylmuramoyl-L-alanyl-D-glutamate-2,6-diaminopimelate ligas    | 10.3  | 1.1 |  | 0.6 |     | 0.8 | 4.4E-01 |
| P45450 | UDP-N-acetylmuramoyl-tripeptide-D-alanyl-D-alanine ligase OS=Synec     | 7.93  | 2.5 |  |     |     | 2.5 | 2.0E+00 |
| P73668 | UDP-N-acetylmuramoylalanine-D-glutamate ligase OS=Synecocystis s       | 6.19  | 2.3 |  | 0.5 | 0.8 | 1.2 | 9.6E-01 |
| P22040 | Uncharacterized ABC transporter ATP-binding protein sll0415 OS=Synec   | 6.78  |     |  |     |     | 0.8 | 2.0E+00 |
| P73335 | Uncharacterized deoxyribonuclease sll1786 OS=Synecocystis sp. (stra    | 24.9  | 1.0 |  | 3.9 | 2.3 | 2.4 | 5.1E-02 |
| Q6ZES9 | Uncharacterized protein OS=Synecocystis sp. (strain PCC 6803 / Kazu    | 21.54 |     |  |     | 0.9 | 0.9 | 2.0E+00 |
| Q6ZED7 | Uncharacterized protein OS=Synecocystis sp. (strain PCC 6803 / Kazu    | 4.27  | 2.6 |  |     |     | 2.6 | 2.0E+00 |
| Q55707 | Uncharacterized protein sll0517 OS=Synecocystis sp. (strain PCC 680    | 34.46 | 0.5 |  | 0.8 | 0.9 | 0.6 | 7.7E-02 |
| P72861 | Uncharacterized protein sll0936 OS=Synecocystis sp. (strain PCC 680    | 4.59  | 1.4 |  |     | 0.8 | 1.1 | 9.6E-01 |
| P72929 | Uncharacterized protein sll1021 OS=Synecocystis sp. (strain PCC 680    | 12.33 | 1.0 |  | 0.4 | 0.6 | 0.7 | 8.4E-02 |
| P74178 | Uncharacterized protein sll1178 OS=Synecocystis sp. (strain PCC 680    | 5.2   |     |  |     | 0.8 | 0.8 | 2.0E+00 |
| P73599 | Uncharacterized protein sll1304 OS=Synecocystis sp. (strain PCC 680    | 11.15 | 0.4 |  | 0.3 | 0.5 | 0.4 | 2.7E-14 |
| P74360 | Uncharacterized protein sll1526 OS=Synecocystis sp. (strain PCC 680    | 14.03 | 1.3 |  | 0.5 | 0.5 | 0.8 | 2.3E-01 |
| P73392 | Uncharacterized protein sll1735 OS=Synecocystis sp. (strain PCC 680    | 27.07 | 1.0 |  |     | 1.7 | 1.3 | 3.2E-01 |
| P73602 | Uncharacterized protein sll1783 OS=Synecocystis sp. (strain PCC 680    | 23.13 | 0.5 |  |     |     | 0.5 | 2.0E+00 |
| Q55458 | Uncharacterized protein sll0039 OS=Synecocystis sp. (strain PCC 680    | 11.2  | 1.4 |  | 0.9 | 0.9 | 1.1 | 7.5E-01 |
| Q55629 | Uncharacterized protein sll0782 OS=Synecocystis sp. (strain PCC 680    | 9.96  |     |  |     | 0.5 | 0.5 | 2.0E+00 |
| P72655 | Uncharacterized protein sll1128 OS=Synecocystis sp. (strain PCC 680    | 27.1  | 1.8 |  | 0.5 | 0.4 | 0.9 | 4.8E-01 |
| P74002 | Uncharacterized protein sll1322 OS=Synecocystis sp. (strain PCC 680    | 26.58 | 0.8 |  | 2.0 | 2.0 | 1.3 | 4.2E-01 |
| P73042 | Uncharacterized protein sll1764 OS=Synecocystis sp. (strain PCC 680    | 23.46 |     |  | 4.1 |     | 4.1 | 2.0E+00 |
| P73321 | Uncharacterized protein sll1894 OS=Synecocystis sp. (strain PCC 680    | 49.36 | 0.8 |  | 2.0 | 1.8 | 1.5 | 2.7E-01 |
| P73152 | Uncharacterized thylakoid-associated protein sll0962 OS=Synecocystis   | 17.97 | 0.5 |  |     |     | 0.5 | 2.0E+00 |
| P73545 | Uncharacterized thylakoid-associated protein sll2501 OS=Synecocystis   | 37.08 | 0.4 |  | 0.1 | 0.3 | 0.3 | 3.2E-05 |
| P74328 | Uncharacterized tRNA/rRNA methyltransferase sll0955 OS=Synecocyst      | 14.32 | 1.0 |  | 1.2 | 1.1 | 1.1 | 2.1E-03 |
| Q55563 | Uncharacterized WD repeat-containing protein sll0163 OS=Synecocyst     | 0.95  |     |  |     |     | 0.7 | 2.0E+00 |
| P74556 | Uncharacterized WD repeat-containing protein sll1491 OS=Synecocyst     | 16.67 | 0.6 |  | 2.0 | 1.8 | 1.5 | 4.6E-01 |
| P72817 | Universal stress protein Sll1654 OS=Synecocystis sp. (strain PCC 680   | 45.86 | 0.9 |  | 1.2 | 1.0 | 1.1 | 5.6E-01 |
| P72699 | UPF0045 protein sll0230 OS=Synecocystis sp. (strain PCC 6803 / Kazu    | 51.24 | 0.6 |  | 1.5 | 1.6 | 1.2 | 7.4E-01 |
| P74607 | UPF0296 protein sll2874 OS=Synecocystis sp. (strain PCC 6803 / Kaz     | 40.45 | 0.7 |  | 0.9 | 0.5 | 0.7 | 3.0E-02 |
| P72753 | Uracil phosphoribosyltransferase OS=Synecocystis sp. (strain PCC 68    | 17.59 | 1.1 |  |     |     | 1.1 | 2.0E+00 |
| P73061 | Urease subunit alpha OS=Synecocystis sp. (strain PCC 6803 / Kazusa     | 16.34 | 0.8 |  | 1.8 | 1.4 | 1.3 | 3.3E-01 |
| P73796 | Urease subunit gamma OS=Synecocystis sp. (strain PCC 6803 / Kazusa     | 31    | 0.4 |  |     | 1.1 | 0.7 | 3.7E-01 |
| P74457 | Uridylate kinase OS=Synecocystis sp. (strain PCC 6803 / Kazusa) GN+    | 6.15  |     |  |     |     | 1.1 | 2.0E+00 |
| P64224 | Uroporphyrinogen decarboxylase OS=Synecocystis sp. (strain PCC 68      | 22.86 | 0.7 |  | 0.9 | 0.8 | 0.8 | 7.9E-03 |
| Q55622 | Valine-tRNA ligase OS=Synecocystis sp. (strain PCC 6803 / Kazusa) C    | 11.54 | 2.5 |  | 0.7 | 0.8 | 1.3 | 7.6E-01 |
| Q55557 | Virginiamycin B hydrolase Vqb OS=Synecocystis sp. (strain PCC 6803     | 34.38 | 0.3 |  | 1.2 | 1.1 | 0.9 | 4.8E-01 |
| P73066 | Ycf23 protein OS=Synecocystis sp. (strain PCC 6803 / Kazusa) GN=yc     | 12.9  | 0.8 |  | 0.4 | 0.4 | 0.5 | 1.5E-03 |
| P74429 | Ycf39 gene product OS=Synecocystis sp. (strain PCC 6803 / Kazusa) C    | 3.99  |     |  |     | 0.8 | 0.8 | 2.0E+00 |
| P73069 | Ycf46-like protein OS=Synecocystis sp. (strain PCC 6803 / Kazusa) GN   | 7.02  | 1.4 |  |     | 0.7 | 1.1 | 9.7E-01 |
| P72777 | Ycf54-like protein OS=Synecocystis sp. (strain PCC 6803 / Kazusa) GN   | 27.62 | 0.7 |  | 1.8 | 1.8 | 1.4 | 3.7E-01 |
| Q55823 | Ycf66-like protein OS=Synecocystis sp. (strain PCC 6803 / Kazusa) GN   | 8.01  |     |  |     | 1.1 | 1.1 | 2.0E+00 |
| P74306 | Zeta-carotene desaturase OS=Synecocystis sp. (strain PCC 6803 / Kaz    | 7.36  |     |  |     | 1.2 | 1.2 | 2.0E+00 |
| P74721 | Zinc-containing alcohol dehydrogenase family OS=Synecocystis sp. (st   | 5.65  | 0.6 |  | 1.6 | 1.1 | 1.1 | 1.0E+00 |
